# Supplementary material for: Polyenolate-mediated reaction cascade initiated by higher-order-cycloaddition for the construction of polycarbocyclic scaffolds
Source: Royal Society of Chemistry journal article supplement (doi:10.1039/d3qo02040a), 2024-01-01
Supplement: d3qo02040a1.pdf [file d3qo02040a1.pdf]

# Polyenolate-mediated reaction cascade initiated by the higher-order-cycloaddition for the construction of polycarbocyclic scaffold

Adam Cieśliński,<sup>a</sup> Anna Skrzyńska,<sup>a</sup> Artur Przydacz<sup>a</sup> and Łukasz Albrecht<sup>a\*</sup>

<sup>a</sup>Institute of Organic Chemistry

Faculty of Chemistry

Lodz University of Technology

Żeromskiego 116, 90-924 Łódź, Poland

e-mail: lukasz.albrecht@p.lodz.pl

## Contents

|    |                                                                                                                                                                                                                                                                       |     |
|----|-----------------------------------------------------------------------------------------------------------------------------------------------------------------------------------------------------------------------------------------------------------------------|-----|
| 1. | General methods                                                                                                                                                                                                                                                       | S3  |
| 2. | Synthesis of 2-((1 <i>H</i> -inden-2-yl)methylene)malononitriles <b>1</b> - general procedure                                                                                                                                                                         | S4  |
| 3. | Polyenolate-mediated reaction cascade initiated by the higher-order-cycloaddition – general procedure                                                                                                                                                                 | S8  |
| 4. | Enantioselective synthesis of (3 <i>S</i> ,4 <i>aS</i> ,9 <i>bR</i> ,10 <i>R</i> ,10 <i>aR</i> )-2-formyl-3,5,10-triphenyl-4 <i>a</i> ,9 <i>b</i> ,10,10 <i>a</i> -tetrahydroindeno[2,1- <i>a</i> ]indene-4,4(3 <i>H</i> )-dicarbonitrile <b>3a</b> on a 1 mmol scale | S19 |
| 5. | Selective transformations of products <b>3</b>                                                                                                                                                                                                                        | S20 |
| 6. | Crystal and X-ray data for (3 <i>S</i> ,4 <i>aS</i> ,9 <i>bS</i> ,10 <i>R</i> ,10 <i>aR</i> )-9-bromo-2-formyl-3,5,10-triphenyl-4 <i>a</i> ,9 <i>b</i> ,10,10 <i>a</i> -tetrahydroindeno[2,1- <i>a</i> ]indene-4,4(3 <i>H</i> )-dicarbonitrile <b>3m</b>              | S22 |
| 7. | NMR Spectra                                                                                                                                                                                                                                                           | S24 |
| 8. | UPC <sup>2</sup> Traces                                                                                                                                                                                                                                               | S58 |

## 1. General methods

NMR spectra were acquired on a Bruker Ultra Shield 700 instrument, running at 700 MHz for  $^1\text{H}$  and 176 MHz for  $^{13}\text{C}$ , respectively or on a Jeol 400YH instrument, running at 376 MHz for  $^{19}\text{F}$ . Chemical shifts ( $\delta$ ) are reported in ppm relative to residual solvent signals ( $\text{CDCl}_3$ : 7.26 ppm for  $^1\text{H}$  NMR, 77.16 ppm for  $^{13}\text{C}$  NMR). Chemical shifts ( $\delta$ ) for  $^{19}\text{F}$  NMR are reported in ppm relative to  $\text{C}_6\text{H}_5\text{CF}_3$  (trifluorotoluene) as external reference. High-resolution mass spectra (HRMS) were obtained on Bruker ESI-Q-TOF Impact II spectrometer using electrospray (ESI+) ionization. Analytical thin layer chromatography (TLC) was performed using pre-coated aluminum-backed plates (Merck Kieselgel 60 F254) and visualized by ultraviolet irradiation or Hanessian's stain. Unless otherwise noted, analytical grade solvents and commercially available reagents were used without further purification. For flash chromatography (FC) silica gel (Silica gel 60, 230-400 mesh, Fluka). The enantiomeric ratio (er) of the products were determined by Ultra Performance Convergence Chromatography (UPC<sup>2</sup>) using Daicel Chiralpak IA,IB,IC,IG columns as chiral stationary phases. Indene-2-carbaldehydes used for the synthesis of the corresponding malononitriles **1** were synthesized according to the literature procedure<sup>1</sup>. Aldehydes **2** were prepared from the corresponding starting materials following the literature procedure.<sup>2</sup>

---

<sup>1</sup> B. S. Donslund, N. I. Jessen, G. Bertuzzi, M. Giardinetti, T. A. Palazzo, M. Louise Christensen, K. A. Jørgensen, *Angew. Chem., Int. Ed.* 2018, **57**, 13182–13186.

<sup>2</sup> N. Daubresse, C. Francesch, C. Rolando, *Tetrahedron* 1998, **54**, 10761-10770.

## 2. Synthesis of 2-((1*H*-inden-2-yl)methylene)malononitriles **1** - general procedure

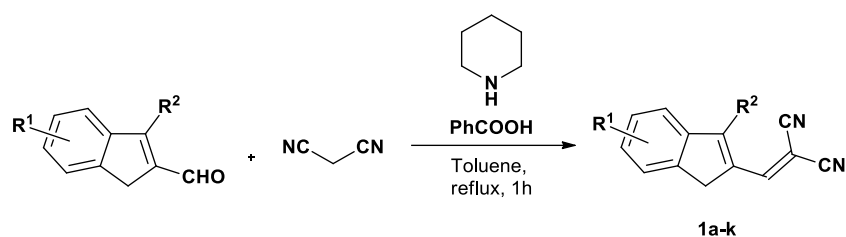

In a flame-dried round-bottom flask equipped with a magnetic stirring bar the corresponding indene-2-carbaldehyde (3 mmol, 1.0 equiv.), malononitrile (3.6 mmol, 1.2 equiv.) and benzoic acid (0.6 mmol, 0.2 equiv.) were dissolved in toluene (18 ml, 0.16 M) and piperidine (0.6 mmol, 0.2 equiv.) was added. The reaction mixture was refluxed for 1 hour. After full conversion of the starting indene-2-carbaldehyde (as confirmed by TLC analysis), mixture was cooled to rt and diluted with Et<sub>2</sub>O (20 mL) and washed with water (2×15 mL), dried over anhydrous sodium sulfate, filtered and concentrated under reduced pressure. The resulting solid was subjected to column chromatography on silica gel (eluent: petroleum ether: dichloromethane 40:60) to afford pure product **1**.

### 2-((3-phenyl-1*H*-inden-2-yl)methylene)malononitrile **1a**

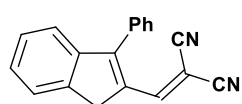

Following the general procedure product **1a** was isolated in 82% yield (660.2 mg) as light-orange solid; mp = 180 °C. <sup>1</sup>H NMR (700 MHz, CDCl<sub>3</sub>) δ 7.67 (s, 1H), 7.66 (d, *J* = 7.6 Hz, 1H), 7.61 – 7.56 (m, 3H), 7.53 – 7.48 (m, 2H), 7.43 – 7.39 (m, 3H), 4.19 (s, 2H). <sup>13</sup>C NMR (176 MHz, CDCl<sub>3</sub>) δ 161.6, 153.0, 145.1, 142.6, 135.6, 132.1, 130.5, 130.2, 129.6 (2C), 129.3 (2C), 127.8, 124.9, 124.1, 115.1, 114.1, 78.8, 38.0. HRMS (ESI) *m/z* [M+H]<sup>+</sup> Calcd. for C<sub>19</sub>H<sub>13</sub>N<sub>2</sub><sup>+</sup>: 269.1073; found: 269.1070.

### 2-((5-methoxy-3-phenyl-1*H*-inden-2-yl)methylene)malononitrile **1b**

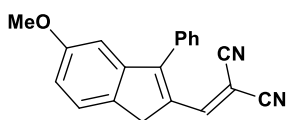

Following the general procedure product **1b** was isolated in 80% yield (715.0 mg) as brown solid; mp = 188 °C. <sup>1</sup>H NMR (700 MHz, CDCl<sub>3</sub>) δ 7.63 (s, 1H), 7.61 – 7.56 (m, 3H), 7.53 (d, *J* = 8.3 Hz, 1H), 7.40 – 7.37 (m, 2H), 7.08 (dd, *J* = 8.3, 2.4 Hz, 1H), 6.95 (d, *J* = 2.4 Hz, 1H), 4.11 (s, 2H), 3.80 (s, 3H). <sup>13</sup>C NMR (176 MHz, CDCl<sub>3</sub>) δ 161.4, 159.8, 152.9, 143.9, 137.5, 136.8, 132.1, 130.1, 129.6 (2C), 129.4 (2C), 125.5, 117.8, 115.1, 114.1, 108.1, 78.7, 55.8, 37.3. HRMS (ESI) *m/z* [M+H]<sup>+</sup> Calcd. for C<sub>20</sub>H<sub>15</sub>N<sub>2</sub>O<sup>+</sup>: 299.1179; found: 299.1172.

### 2-((6-methoxy-3-phenyl-1*H*-inden-2-yl)methylene)malononitrile **1c**

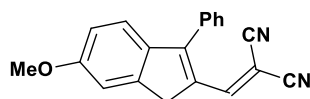

Following the general procedure product **1c** was isolated in 88% yield (786.7 mg) as brown solid; mp = 192 °C. <sup>1</sup>H NMR (700 MHz, CDCl<sub>3</sub>) δ 7.61 – 7.54 (m, 4H), 7.41 – 7.36 (m, 3H), 7.18 (d, *J* = 2.0 Hz, 1H), 6.95 (dd, *J* = 8.6, 2.3 Hz, 1H), 4.14 (s, 2H), 3.91 (s, 3H). <sup>13</sup>C NMR (176 MHz, CDCl<sub>3</sub>) δ 162.7, 161.9, 152.6, 148.1, 135.9, 133.8, 132.3, 130.1, 129.6 (2C), 129.3 (2C), 125.4, 115.6, 115.0, 114.7, 109.9, 76.3, 55.9, 37.9. HRMS (ESI) *m/z* [M+H]<sup>+</sup> Calcd. for C<sub>20</sub>H<sub>15</sub>N<sub>2</sub>O<sup>+</sup>: 299.1179; found: 299.1169.

### 2-((5-methyl-3-phenyl-1*H*-inden-2-yl)methylene)malononitrile **1d**

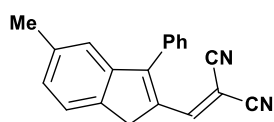

Following the general procedure product **1d** was isolated in 97% yield (820.1 mg) as light-yellow solid; mp = 196 °C. <sup>1</sup>H NMR (700 MHz, CDCl<sub>3</sub>) δ 7.65 (s, 1H), 7.63 – 7.56 (m, 3H), 7.53 (d, *J* = 7.7 Hz, 1H), 7.40 (dt, *J* = 4.2, 2.3 Hz, 2H), 7.33 (dd, *J* = 7.7, 0.7 Hz, 1H), 7.28 (d, *J* = 0.6 Hz, 1H), 4.13 (s, 2H), 2.41 (s, 3H). <sup>13</sup>C NMR (176 MHz, CDCl<sub>3</sub>) δ 161.7, 153.0, 142.9, 142.4, 137.7, 135.9, 132.2, 131.7, 130.1, 129.6 (2C), 129.3 (2C), 124.6, 124.4, 115.2, 114.2, 78.4, 37.6, 21.5. HRMS (ESI) *m/z* [M+H]<sup>+</sup> Calcd. for C<sub>20</sub>H<sub>15</sub>N<sub>2</sub><sup>+</sup>: 283.1230; found: 283.1224.

### 2-((6-bromo-3-phenyl-1*H*-inden-2-yl)methylene)malononitrile **1e**

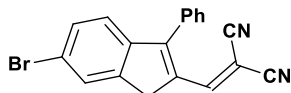

Following the general procedure product **1e** was isolated in 78% yield (812.0 mg) as dark yellow solid; mp = 198 °C. <sup>1</sup>H NMR (700 MHz, CDCl<sub>3</sub>) δ 7.79 (d, *J* = 1.0 Hz, 1H), 7.64 (s, 1H), 7.62 – 7.56 (m, 3H), 7.54 (dd, *J* = 8.3, 1.7 Hz, 1H), 7.39 – 7.35 (m, 2H), 7.33 (d, *J* = 8.2 Hz, 1H), 4.15 (s, 2H). <sup>13</sup>C NMR (176 MHz, CDCl<sub>3</sub>) δ 160.5, 152.7, 146.5, 141.6, 135.5, 131.6, 131.2, 130.4, 129.6 (2C), 129.5 (2C), 128.2, 125.3, 125.0, 114.9, 114.0, 79.6, 37.8. HRMS (ESI) *m/z* [M-H]<sup>-</sup> Calcd. for C<sub>19</sub>H<sub>10</sub>BrN<sub>2</sub><sup>-</sup>: 345.0033; found: 345.0036.

### 2-((7-bromo-3-phenyl-1*H*-inden-2-yl)methylene)malononitrile **1f**

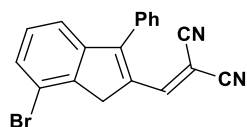

Following the general procedure product **1f** was isolated in 64 % yield (666.2 mg) as dark yellow solid; mp = 204 °C. <sup>1</sup>H NMR (700 MHz, CDCl<sub>3</sub>) δ 7.66 (s, 1H), 7.63 (dd, *J* = 7.9, 0.7 Hz, 1H), 7.62 – 7.57 (m, 3H), 7.44 (dd, *J* = 7.7, 0.7 Hz, 1H), 7.40 – 7.37 (m, 2H), 7.30 (t, *J* = 7.8 Hz, 1H), 4.14 (s, 2H). <sup>13</sup>C NMR (176 MHz, CDCl<sub>3</sub>) δ 160.7, 152.6, 144.9, 144.0, 135.6, 133.2, 131.8, 130.4, 129.6 (2C), 129.5, 129.4 (2C),

123.0, 119.8, 114.8, 113.6, 80.3, 39.5. HRMS (ESI)  $m/z$   $[M+H]^+$  Calcd. for  $C_{19}H_{12}BrN_2^+$ : 347.0179; found: 347.0176.

### 2-((3-(4-methoxyphenyl)-1*H*-inden-2-yl)methylene)malononitrile **1g**

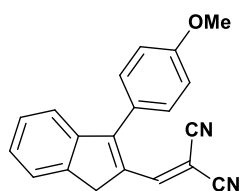

Following the general procedure product **1g** was isolated in 80% yield (715.2 mg) as red solid; mp = 158 °C.  $^1H$  NMR (700 MHz,  $CDCl_3$ )  $\delta$  7.68 (s, 1H), 7.64 (d,  $J$  = 7.5 Hz, 1H), 7.53 (d,  $J$  = 7.7 Hz, 1H), 7.51 – 7.48 (m, 1H), 7.41 (t,  $J$  = 7.5 Hz, 1H), 7.38 – 7.34 (m, 2H), 7.14 – 7.09 (m, 2H), 4.16 (s, 2H), 3.92 (s, 3H).  $^{13}C$  NMR (176 MHz,  $CDCl_3$ )  $\delta$  161.5, 161.3, 153.2, 145.2, 142.7, 135.0, 131.3 (2C), 130.4, 127.7, 124.9, 124.4, 124.1, 115.3, 114.9 (2C), 114.3, 78.1, 55.6, 37.9. HRMS (ESI)  $m/z$   $[M+H]^+$  Calcd. for  $C_{20}H_{15}N_2O^+$ : 299.1179; found: 299.1170.

### 2-((3-(4-fluorophenyl)-1*H*-inden-2-yl)methylene)malononitrile **1h**

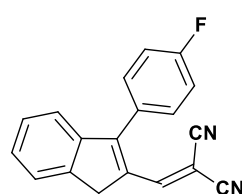

Following the general procedure product **1h** was isolated in 81% yield (696 mg) as light-yellow solid; mp = 184°C.  $^1H$  NMR (700 MHz,  $CDCl_3$ )  $\delta$  7.66 (d,  $J$  = 7.6 Hz, 1H), 7.62 (s, 1H), 7.52 (td,  $J$  = 7.4, 1.2 Hz, 1H), 7.46 (d,  $J$  = 7.6 Hz, 1H), 7.42 (d,  $J$  = 7.6 Hz, 1H), 7.41 – 7.39 (m, 2H), 7.32 – 7.28 (m, 2H), 4.18 (s,  $J$  = 46.5 Hz, 2H).  $^{13}C$  NMR (176 MHz,  $CDCl_3$ )  $\delta$  163.8 (d,  $J$  = 251.5 Hz), 160.3, 152.6, 145.0, 142.5, 135.8, 131.6 (d,  $J$  = 8.5 Hz) (2C), 130.7, 128.1 (d,  $J$  = 3.5 Hz), 127.9, 125.0, 123.8, 116.67 (d,  $J$  = 21.8 Hz) (2C), 115.0, 114.0, 79.2, 38.0.  $^{19}F$  NMR (376 MHz,  $CDCl_3$ )  $\delta$  -109.6. HRMS (ESI)  $m/z$   $[M+H]^+$  Calcd. for  $C_{19}H_{12}FN_2^+$ : 287.0979; found: 287.0974.

### 2-((3-([1,1'-biphenyl]-4-yl)-1*H*-inden-2-yl)methylene)malononitrile **1i**

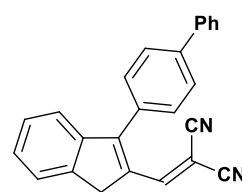

Following the general procedure product **1i** was isolated in 78% yield (804.9 mg) as light-yellow solid; mp = 240 °C.  $^1H$  NMR (700 MHz,  $CDCl_3$ )  $\delta$  7.83 – 7.80 (m, 2H), 7.74 (s, 1H), 7.71 – 7.66 (m, 3H), 7.57 (d,  $J$  = 7.7 Hz, 1H), 7.54 – 7.51 (m, 3H), 7.50 – 7.48 (m, 2H), 7.44 (t,  $J$  = 7.4 Hz, 2H), 4.21 (s, 2H).  $^{13}C$  NMR (176 MHz,  $CDCl_3$ )  $\delta$  161.1, 152.9, 145.1, 143.1, 142.5, 139.9, 135.5, 130.8, 130.5, 130.1 (2C), 129.1 (2C), 128.1, 127.9 (2C), 127.7, 127.2 (2C), 124.9, 124.0, 115.0, 114.1, 78.7, 38.0. HRMS (ESI)  $m/z$   $[M+Na]^+$  Calcd. for  $C_{25}H_{16}N_2Na^+$ : 367.1206; found: 367.1199.

### 2-((3-(5-methylthiophen-2-yl)-1H-inden-2-yl)methylene)malononitrile **1j**

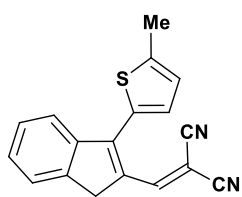

Following the general procedure product **1j** was isolated in 87% yield (751.7 mg) as orange solid; mp = 191 °C. <sup>1</sup>H NMR (700 MHz, CDCl<sub>3</sub>) δ 7.96 (s, 1H), 7.83 (d, *J* = 7.8 Hz, 1H), 7.62 (d, *J* = 7.5 Hz, 1H), 7.50 (td, *J* = 7.4, 1.1 Hz, 1H), 7.44 (t, *J* = 7.5 Hz, 1H), 7.14 (d, *J* = 3.5 Hz, 1H), 7.00 – 6.95 (m, 1H), 4.14 (s, 2H), 2.64 (d, *J* = 0.6 Hz, 3H). <sup>13</sup>C NMR (176 MHz, CDCl<sub>3</sub>) δ 153.2, 152.8, 145.8, 145.0, 141.8, 135.2, 131.4, 130.5, 130.5, 127.8, 127.1, 124.9, 124.2, 115.4, 114.3, 78.4, 38.0, 15.7. HRMS (ESI) *m/z* [M+Na]<sup>+</sup> Calcd. for C<sub>18</sub>H<sub>12</sub>N<sub>2</sub>Na<sup>+</sup>: 311.0614; found: 311.0619.

### 2-((1H-inden-2-yl)methylene)malononitrile **1k**

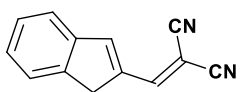

Following the general procedure product **1k** was isolated in 46% yield (265.0 mg) as orange solid; mp = 175 °C. <sup>1</sup>H NMR (700 MHz, CDCl<sub>3</sub>) δ 7.75 (s, 1H), 7.65 (s, 1H), 7.60 (d, *J* = 7.6 Hz, 1H), 7.58 (d, *J* = 7.5 Hz, 1H), 7.46 (td, *J* = 7.5, 1.1 Hz, 1H), 7.41 (t, *J* = 7.4 Hz, 1H), 4.00 (s, 2H). <sup>13</sup>C NMR (176 MHz, CDCl<sub>3</sub>) δ 153.9, 150.0, 145.9, 141.7, 140.7, 130.2, 127.9, 124.8, 124.5, 114.5, 113.6, 79.7, 37.9. HRMS (ESI) *m/z* [M+H]<sup>+</sup> Calcd. for C<sub>13</sub>H<sub>9</sub>N<sub>2</sub><sup>+</sup>: 193.0760; found: 193.0762.

### 3. Polyenolate-mediated reaction cascade initiated by the higher-order-cycloaddition - general procedure

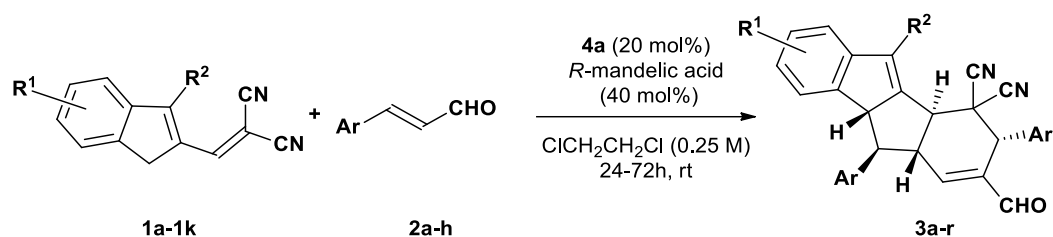

In an ordinary 4 mL glass vial equipped with a magnetic stirring, corresponding malononitrile **1** (0.2 mmol),  $\alpha,\beta$ -unsaturated aldehyde **2** (0.2 mmol) and *R*-mandelic acid (0.04 mmol) were dissolved in DCE (0.4 mL) and catalyst **4a** (6.6 mg, 0.02 mmol) was added. The reaction mixture was stirred in room temperature for the indicated time. The progress of the reaction was controlled by  $^1\text{H}$  NMR spectroscopy. After full conversion of the starting material **1**, the reaction mixture was directly subjected to column chromatography on silica gel (hexanes: ethyl acetate 80:20) to afford pure product **3**.

#### (3*S*,4*aS*,9*bR*,10*R*,10*aR*)-2-formyl-3,5,10-triphenyl-4*a*,9*b*,10,10*a*-tetrahydroindeno[2,1-*a*]indene-4,4(3*H*)-dicarbonitrile **3a**

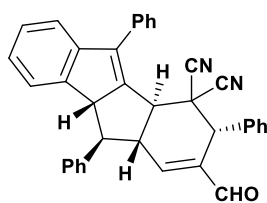

Following the general procedure product **3a** (>20:1 dr in a crude reaction mixture) was isolated as a single diastereoisomer in 65% yield (33.4 mg) as yellow solid; mp = 226 °C.  $^1\text{H}$  NMR (700 MHz,  $\text{CDCl}_3$ )  $\delta$  9.35 (s, 1H), 7.57 (d,  $J = 4.8$  Hz, 4H), 7.51 – 7.46 (m, 2H), 7.44 (t,  $J = 7.3$  Hz, 2H), 7.28 (d,  $J = 7.3$  Hz, 2H), 7.25 (d,  $J = 7.3$  Hz, 1H), 7.21 (t,  $J = 8.2$  Hz, 2H), 7.16 (d,  $J = 0.9$  Hz, 1H), 7.13 – 7.07 (m, 3H), 7.03 – 7.00 (m, 3H), 4.62 (s, 1H), 4.35 (dd,  $J = 10.6, 1.9$  Hz, 1H), 4.07 – 3.99 (m, 1H), 3.88 (dd,  $J = 11.9, 2.1$  Hz, 1H), 2.81 (t,  $J = 11.1$  Hz, 1H).  $^{13}\text{C}$  NMR (176 MHz,  $\text{CDCl}_3$ )  $\delta$  190.5, 148.2, 148.2, 143.5, 142.8, 141.4, 138.9, 137.7, 134.9, 133.9, 130.0 (2C), 129.7 (2C), 129.5, 129.0 (2C), 128.6 (2C), 128.4, 128.2, 127.9 (2C), 127.8 (2C), 127.7, 125.6, 123.7, 121.5, 114.9, 112.0, 64.7, 53.8, 49.8, 49.7, 41.1, 39.8. The er was determined by UPC<sup>2</sup> using a chiral Chiralpack IB column gradient from 100%  $\text{CO}_2$  up to 40%; *i*-PrOH, flow rate = 2.2 mL/min  $\tau_{\text{major}} = 5.33$  min,  $\tau_{\text{minor}} = 6.88$  min, (> 99:1 er).  $[\alpha]_{\text{D}}^{21} = + 81.3$  ( $c = 1.0$ ,  $\text{CHCl}_3$ ). HRMS (ESI)  $m/z$   $[\text{M}+\text{H}]^+$  Calcd. for  $\text{C}_{37}\text{H}_{27}\text{N}_2\text{O}^+$ : 515.2118; found: 515.2116.

**(3*S*,4*aS*,9*bR*,10*R*,10*aR*)-2-formyl-3,10-bis(4-methoxyphenyl)-5-phenyl-4*a*,9*b*,10,10*a*-tetrahydroindeno[2,1-*a*]indene-4,4(3*H*)-dicarbonitrile 3b**

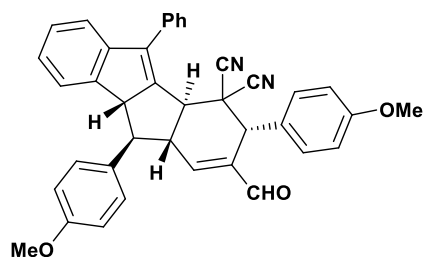

Following the general procedure product **3b** (17:1 dr in a crude reaction mixture) was isolated as a single diastereoisomer in 60% yield (34.3 mg) as yellow solid; mp = 194 °C. <sup>1</sup>H NMR (700 MHz, CDCl<sub>3</sub>) δ 9.34 (s, 1H), 7.50 – 7.45 (m, 2H), 7.26 – 7.23 (m, 2H), 7.22 – 7.16 (m, 4H), 7.15 – 7.08 (m, 6H), 7.07 – 7.02 (m, 3H), 6.98 – 6.93 (m, 2H), 4.58 (s, 1H), 4.29 (dd, *J* = 10.6, 2.1 Hz, 1H), 3.97 – 3.92 (m, 1H), 3.92 (s, 3H), 3.87 (s, 3H), 3.83 (dd, *J* = 11.9, 2.2 Hz, 1H), 2.75 (t, *J* = 11.0 Hz, 1H). <sup>13</sup>C NMR (176 MHz, CDCl<sub>3</sub>) δ 190.6, 160.6, 159.7, 148.2, 148.1, 143.7, 142.7, 141.6, 139.1, 134.1, 131.2 (2C), 129.4, 128.9 (2C), 128.6 (2C), 128.2, 128.0 (2C), 127.7, 126.9, 125.5, 123.7, 121.5, 115.0 (2C), 114.9, 114.3 (2C), 112.2, 65.0, 55.6, 55.5, 53.9, 49.2, 49.0, 41.3, 39.8. The er was determined by UPC<sup>2</sup> using a chiral Chiralpack IB column gradient from 100% CO<sub>2</sub> up to 40%; *i*-PrOH, flow rate = 2.2 mL/min τ<sub>major</sub> = 7.10 min, τ<sub>minor</sub> = 4.94 min, (> 99:1 er). [α]<sub>D</sub><sup>21</sup> = + 45.2 (c = 1.0, CHCl<sub>3</sub>). HRMS (ESI) *m/z* [M+H]<sup>+</sup> Calcd. for C<sub>39</sub>H<sub>31</sub>N<sub>2</sub>O<sub>3</sub><sup>+</sup>: 575.2329; found: 575.2313.

**3*S*,4*aS*,9*bR*,10*R*,10*aR*)-2-formyl-3,10-bis(3-methoxyphenyl)-5-phenyl-4*a*,9*b*,10,10*a*-tetrahydroindeno[2,1-*a*]indene-4,4(3*H*)-dicarbonitrile 3c**

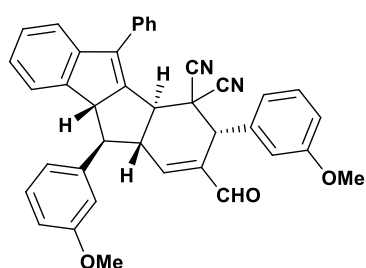

Following the general procedure product **3c** (20:1 dr in a crude reaction mixture) was isolated as a single diastereoisomer in 44% yield (25.2 mg) as yellow solid; mp = 170 °C. <sup>1</sup>H NMR (700 MHz, CDCl<sub>3</sub>) δ 9.35 (s, 1H), 7.49 (dd, *J* = 8.3, 7.5 Hz, 1H), 7.35 (t, *J* = 8.0 Hz, 1H), 7.26 – 7.19 (m, 3H), 7.17 – 7.15 (m, 2H), 7.14 – 7.10 (m, 3H), 7.09 – 7.04 (m, 4H), 7.01 (dddd, *J* = 9.5, 8.4, 2.5, 0.9 Hz, 2H), 6.85 – 6.81 (m, 2H), 4.59 – 4.56 (m, 1H), 4.34 (dd, *J* = 10.6, 2.4 Hz, 1H), 3.97 (tt, *J* = 11.7, 2.0 Hz, 1H), 3.92 (s, 3H), 3.90 (dd, *J* = 11.9, 2.4 Hz, 1H), 3.84 (s, 3H), 2.76 (t, *J* = 11.1 Hz, 1H). <sup>13</sup>C NMR (176 MHz, CDCl<sub>3</sub>) δ 190.5, 160.6, 160.0, 148.3, 148.2, 143.6, 142.9, 141.4, 139.4, 138.9, 136.4, 134.0, 130.7, 130.0, 128.6 (2C), 128.2, 127.9 (2C), 127.7, 125.6, 123.8, 122.2, 121.5, 120.0, 116.3, 114.9, 114.6, 114.2, 113.1, 112.0, 64.6, 55.6, 55.5, 53.8, 49.8, 49.7, 41.1, 39.9. The er was determined by UPC<sup>2</sup> using a chiral Chiralpack IB column gradient from 100% CO<sub>2</sub> up to 40%; *i*-PrOH, flow



rate = 2.2 mL/min  $\tau_{\text{major}} = 6.21$  min,  $\tau_{\text{minor}} = 5.51$  min, (> 99:1 er).  $[\alpha]_{\text{D}}^{21} = +167.1$  (c = 1.0, CHCl<sub>3</sub>). HRMS (ESI) m/z [M+H]<sup>+</sup> Calcd. for C<sub>39</sub>H<sub>30</sub>N<sub>2</sub>O<sub>3</sub><sup>+</sup>: 575.2329; found: 575.2334.

**(3*S*,4*aS*,9*bR*,10*R*,10*aR*)-2-formyl-5-phenyl-3,10-di-*p*-tolyl-4*a*,9*b*,10,10*a*-tetrahydroindeno[2,1-*a*]indene-4,4(3*H*)-dicarbonitrile 3d**

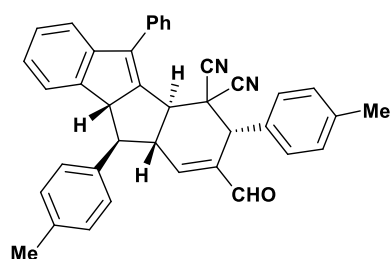

Following the general procedure product **3d** (20:1 dr in a crude reaction mixture) was isolated as a single diastereoisomer in 59% yield (31.8 mg) as yellow solid; mp = 217 °C. <sup>1</sup>H NMR (700 MHz, CDCl<sub>3</sub>)  $\delta$  9.34 (s, 1H), 7.46 (d, *J* = 8.1 Hz, 2H), 7.38 (d, *J* = 7.7 Hz, 2H), 7.25 – 7.19 (m, 4H), 7.18 – 7.12 (m, 4H), 7.12 – 7.06 (m, 3H), 7.06 – 7.01 (m, 3H), 4.59 (s, 1H), 4.33 (dd, *J* = 10.6, 2.1 Hz, 1H), 3.97 (tt, *J* = 11.6, 1.9 Hz, 1H), 3.87 (dd, *J* = 12.0, 2.2 Hz, 1H), 2.77 (t, *J* = 11.0 Hz, 1H), 2.49 (s, 3H), 2.44 (s, 3H). <sup>13</sup>C NMR (176 MHz, CDCl<sub>3</sub>)  $\delta$  190.6, 148.2, 148.2, 143.7, 142.6, 141.7, 139.6, 139.0, 138.2, 134.6, 134.1, 132.0, 130.3 (2C), 129.9 (2C), 129.7 (2C), 128.5 (2C), 128.1, 128.0 (2C), 127.7 (2C), 127.7, 125.5, 123.7, 121.4, 115.0, 112.1, 64.8, 53.9, 49.5, 49.4, 41.2, 39.8, 21.4, 21.3. The er was determined by UPC<sup>2</sup> using a chiral Chiralpack IB column gradient from 100% CO<sub>2</sub> up to 40%; *i*-PrOH, flow rate = 2.2 mL/min  $\tau_{\text{major}} = 4.79$  min,  $\tau_{\text{minor}} = 4.17$  min, (> 99:1 er).  $[\alpha]_{\text{D}}^{21} = +100.1$  (c = 1.0, CHCl<sub>3</sub>). HRMS (ESI) m/z [M+H]<sup>+</sup> Calcd. for C<sub>39</sub>H<sub>31</sub>N<sub>2</sub>O<sup>+</sup>: 543.2431; found: 543.2445.

**(3*S*,4*aS*,9*bR*,10*R*,10*aR*)-3,10-bis(4-chlorophenyl)-2-formyl-5-phenyl-4*a*,9*b*,10,10*a*-tetrahydroindeno[2,1-*a*]indene-4,4(3*H*)-dicarbonitrile 3e**

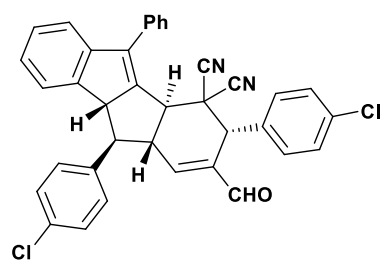

Following the general procedure product **3e** (20:1 dr in a crude reaction mixture) was isolated as a single diastereoisomer in 55% yield (32.1 mg) as brown solid; mp = 188 °C. <sup>1</sup>H NMR (700 MHz, CDCl<sub>3</sub>)  $\delta$  9.35 (s, 1H), 7.56 (d, *J* = 8.6 Hz, 2H), 7.50 (d, *J* = 8.5 Hz, 2H), 7.42 (d, *J* = 8.6 Hz, 2H), 7.30-7.26 (m, 1H), 7.26-7.10 (m, 8H), 7.04-7.00 (m, 3H), 4.58 (s, 1H), 4.29 (dd, *J* = 10.6, 1.9 Hz, 1H), 4.02 – 3.91 (m, 1H), 3.76 (dd, *J* = 11.9, 2.2 Hz, 1H), 2.78 (t, *J* = 11.1 Hz, 1H). <sup>13</sup>C NMR (176 MHz, CDCl<sub>3</sub>)  $\delta$  190.1, 149.0, 148.0, 143.4, 143.1, 140.5, 138.7, 136.0, 135.8, 134.3, 133.7, 133.3, 131.1 (2C), 129.8 (2C), 129.1 (2C), 129.0 (2C), 128.6 (2C), 128.3, 127.8, 127.7 (2C), 125.7, 123.5, 121.6, 114.5, 111.7, 64.61, 53.6, 49.0, 49.0, 40.9, 39.7. The er was determined by UPC<sup>2</sup> using a chiral Chiralpack IB column gradient from 100% CO<sub>2</sub> up to 40%; *i*-PrOH, flow rate = 2.2 mL/min  $\tau_{\text{major}}$

= 5.54 min,  $\tau_{\text{minor}} = 4.89$  min, (> 99:1 er).  $[\alpha]_{\text{D}}^{21} = + 85.0$  (c = 1.0, CHCl<sub>3</sub>). HRMS (ESI) m/z [M+H]<sup>+</sup> Calcd. for C<sub>37</sub>H<sub>25</sub>Cl<sub>2</sub>N<sub>2</sub>O<sup>+</sup>: 583.1338; found: 583.1343.

**(3S,4aS,9bR,10R,10aR)-2-formyl-5-phenyl-3,10-bis(4-(trifluoromethyl)phenyl)-4a,9b,10,10a-tetrahydroindeno[2,1-a]indene-4,4(3H)-dicarbonitrile 3f**

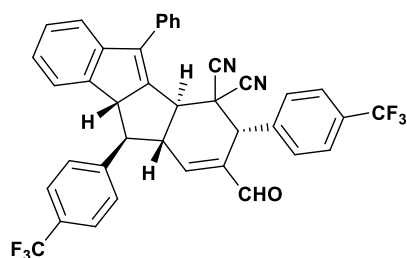

Following the general procedure product **3f** (20:1 dr in a crude reaction mixture) was isolated as a single diastereoisomer in 36% yield (23.1 mg) as yellow solid; mp = 200 °C. <sup>1</sup>H NMR (700 MHz, CDCl<sub>3</sub>)  $\delta$  9.37 (s, 1H), 7.86 (d, *J* = 8.0 Hz, 2H), 7.71 (dd, *J* = 8.0, 3.1 Hz, 4H), 7.41 (d, *J* = 8.1 Hz, 2H), 7.30 – 7.26 (m, 1H), 7.25 – 7.20 (m, 1H), 7.19 (d, *J* = 7.6 Hz, 1H), 7.17 (d, *J* = 1.0 Hz, 1H), 7.14 (td, *J* = 7.5, 0.9 Hz, 1H), 7.10 (t, *J* = 7.8 Hz, 2H), 6.99 (dd, *J* = 14.9, 7.2 Hz, 3H), 4.66 (s, 1H), 4.35 (dd, *J* = 10.6, 2.1 Hz, 1H), 4.06 (tt, *J* = 11.8, 2.0 Hz, 1H), 3.78 (dd, *J* = 11.9, 2.2 Hz, 1H), 2.88 (t, *J* = 11.2 Hz, 1H). <sup>13</sup>C NMR (176 MHz, CDCl<sub>3</sub>)  $\delta$  190.1, 148.2, 148.1, 144.0, 143.0, 141.8, 140.1, 138.8, 138.7, 133.6, 131.9 (q, *J* = 32.7 Hz), 131.0 (q, *J* = 32.9 Hz), 130.4 (2C), 128.7 (2C), 128.6, 128.3 (2C), 128.1, 127.7 (2C), 126.8 (q, *J* = 3.5 Hz, 2C), 126.0, 126.0 (q, *J* = 3.7 Hz, 2C), 124.1 (q, *J* = 272.1 Hz), 123.9 (q, *J* = 272.2 Hz), 123.6, 121.9, 114.4, 111.6, 64.6, 53.7, 49.5, 49.3, 41.0, 39.9. <sup>19</sup>F NMR (376 MHz CDCl<sub>3</sub>)  $\delta$  -62.44, -62.64. The er was determined by UPC<sup>2</sup> using a chiral Chiralpack IA column gradient from 100% CO<sub>2</sub> up to 40%; *i*-PrOH, flow rate = 2.2 mL/min  $\tau_{\text{major}} = 3.08$  min,  $\tau_{\text{minor}} = 2.89$  min, (> 99:1 er).  $[\alpha]_{\text{D}}^{21} = + 78.6$  (c = 1.0, CHCl<sub>3</sub>). HRMS (ESI) m/z [M+H]<sup>+</sup> Calcd. for C<sub>39</sub>H<sub>25</sub>F<sub>6</sub>N<sub>2</sub>O<sup>+</sup>: 651.1865; found: 651.1859.

**(3S,4aS,9bR,10R,10aR)-2-formyl-3,10-di(naphthalen-2-yl)-5-phenyl-4a,9b,10,10a-tetrahydroindeno[2,1-a]indene-4,4(3H)-dicarbonitrile 3g**

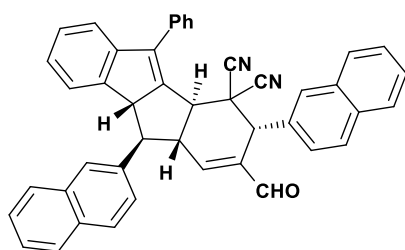

Following the general procedure product **3g** (>20:1 dr in a crude reaction mixture) was isolated as a single diastereoisomer in 50% yield (30.7 mg) as yellow solid; mp = 190 °C. <sup>1</sup>H NMR (700 MHz, CDCl<sub>3</sub>)  $\delta$  9.36 (s, 1H), 8.10 (d, *J* = 8.5 Hz, 1H), 8.06 – 8.04 (m, 1H), 8.01 – 7.96 (m, 2H), 7.95 – 7.92 (m, 2H), 7.90 – 7.85 (m, 1H), 7.75 (dd, *J* = 8.4, 2.0 Hz, 1H), 7.68 – 7.66 (m, 1H), 7.65 – 7.56 (m, 4H), 7.47 (dd, *J* = 8.5, 2.0 Hz, 1H), 7.25 – 7.22 (m, 2H), 7.18 (dt, *J* = 7.6, 1.0 Hz, 1H), 7.07 (td, *J* = 7.4, 1.2 Hz, 1H), 6.98 (ddt, *J* = 16.4, 7.6, 1.0 Hz, 2H), 6.92 (dt, *J* = 6.7, 1.3 Hz, 2H), 6.66 – 6.62 (m, 2H), 4.83 – 4.79 (m, 1H), 4.50 (dd, *J* = 10.6, 2.4 Hz, 1H), 4.19 (tt, *J* = 11.7, 2.1 Hz, 1H), 4.11 (dd,

$J = 11.9, 2.3$  Hz, 1H), 3.04 (t,  $J = 11.0$  Hz, 1H).  $^{13}\text{C}$  NMR (176 MHz,  $\text{CDCl}_3$ )  $\delta$  190.5, 148.4, 148.1, 143.6, 143.1, 141.4, 139.1, 135.2, 133.9, 133.8, 133.7, 133.4, 133.0, 132.7, 129.6, 129.0, 128.8, 128.3 (2C), 128.2, 128.1, 128.1, 128.0, 127.9 (2C), 127.8, 127.7 (2C), 127.3, 127.2, 127.0 (2C), 126.6, 125.7, 125.3, 123.8, 121.5, 115.0, 112.0, 64.8, 53.9, 50.1, 50.0, 41.1, 40.0. The er was determined by UPC<sup>2</sup> using a chiral Chiralpack IB column gradient from 100%  $\text{CO}_2$  up to 40%; ACN flow rate = 2.2 mL/min  $\tau_{\text{major}} = 5.91$  min,  $\tau_{\text{minor}} = 5.40$  min, (> 99:1 er).  $[\alpha]_{\text{D}}^{21} = -16.7$  ( $c = 1.0$ ,  $\text{CHCl}_3$ ). HRMS (ESI)  $m/z$   $[\text{M}+\text{H}]^+$  Calcd. for  $\text{C}_{45}\text{H}_{30}\text{N}_2\text{O}_6^+$ : 615.2431; found: 615.2440.

**(3*S*,4*aS*,9*bR*,10*R*,10*aS*)-2-formyl-3,10-di(furan-2-yl)-5-phenyl-4*a*,9*b*,10,10*a*-tetrahydroindeno[2,1-*a*]indene-4,4(3*H*)-dicarbonitrile 3h**

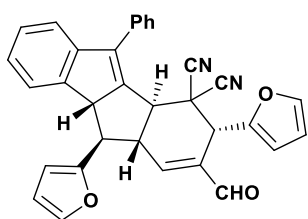

Following the general procedure product **3h** (20:1 dr in a crude reaction mixture) was isolated as a single diastereoisomer in 52% yield (25.6 mg) as yellow solid; mp = 174 °C.  $^1\text{H}$  NMR (700 MHz,  $\text{CDCl}_3$ )  $\delta$  9.40 (s, 1H), 7.61 (dt,  $J = 1.9, 1.0$  Hz, 1H), 7.46 (dd,  $J = 1.9, 1.0$  Hz,

1H), 7.34 – 7.27 (m, 5H), 7.28 – 7.17 (m, 5H), 6.55 (dd,  $J = 3.2, 1.9$  Hz, 1H), 6.51 (d,  $J = 3.2$  Hz, 1H), 6.46 (dd,  $J = 3.3, 1.9$  Hz, 1H), 6.43 (dd,  $J = 3.4, 1.0$  Hz, 1H), 4.72 (d,  $J = 1.6$  Hz, 1H), 4.42 (dd,  $J = 10.7, 2.3$  Hz, 1H), 4.05 (dd,  $J = 11.9, 2.3$  Hz, 1H), 3.97 (tt,  $J = 12.1, 2.1$  Hz, 1H), 2.95 (t,  $J = 10.9$  Hz, 1H).  $^{13}\text{C}$  NMR (176 MHz,  $\text{CDCl}_3$ )  $\delta$  190.2, 152.0, 148.6, 148.3, 148.1, 143.7, 143.4, 143.3, 143.1, 141.0, 136.8, 134.1, 128.8 (2C), 128.4, 128.0 (2C), 127.9, 125.8, 123.9, 121.6, 114.1, 112.4, 111.7, 111.4, 111.0, 108.0, 62.4, 52.2, 43.8, 42.8, 41.3, 40.5. The er was determined by UPC<sup>2</sup> using a chiral Chiralpack IB column gradient from 100%  $\text{CO}_2$  up to 40%; *i*-PrOH, flow rate = 2.2 mL/min  $\tau_{\text{major}} = 4.03$  min,  $\tau_{\text{minor}} = 4.25$  min, (> 99:1 er).  $[\alpha]_{\text{D}}^{21} = +58.2$  ( $c = 1.0$ ,  $\text{CHCl}_3$ ). HRMS (ESI)  $m/z$   $[\text{M}+\text{H}]^+$  Calcd. for  $\text{C}_{33}\text{H}_{23}\text{N}_2\text{O}_3^+$ : 495.1703; found: 495.1716.

**(3*S*,4*aS*,9*bR*,10*R*,10*aR*)-2-formyl-7-methoxy-3,5,10-triphenyl-4*a*,9*b*,10,10*a*-tetrahydroindeno[2,1-*a*]indene-4,4(3*H*)-dicarbonitrile 3i**

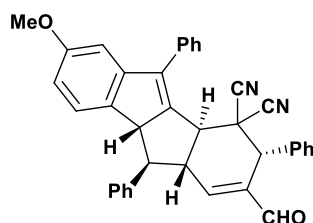

Following the general procedure product **3i** (20:1 dr in a crude reaction mixture) was isolated as a single diastereoisomer in 53% yield (28.8 mg) as yellow solid; mp = 170 °C.  $^1\text{H}$  NMR (700 MHz,  $\text{CDCl}_3$ )  $\delta$  9.35 (s, 1H), 7.58 – 7.54 (m, 4H), 7.50 – 7.46 (m, 2H), 7.44 (t,  $J =$

7.3 Hz, 2H), 7.28 (d,  $J = 7.3$  Hz, 2H), 7.22 – 7.18 (m, 1H), 7.15 (d,  $J = 1.1$  Hz, 1H), 7.09 (t,  $J = 7.7$  Hz, 2H), 7.00 (d,  $J = 7.0$  Hz, 2H), 6.91 (d,  $J = 8.3$  Hz, 1H), 6.72 (t,  $J = 2.9$  Hz, 1H), 6.66 (dd,  $J = 8.3, 2.4$  Hz, 1H), 4.61 (s, 1H), 4.29 (dd,  $J = 10.6, 1.9$  Hz, 1H), 3.99 (tt,  $J = 11.8, 2.0$  Hz, 1H), 3.86 (dd,

$J = 11.9, 2.1$  Hz, 1H), 3.71 (s, 3H), 2.76 (t,  $J = 11.2$  Hz, 1H).  $^{13}\text{C}$  NMR (176 MHz,  $\text{CDCl}_3$ )  $\delta$  190.5, 160.0, 149.7, 148.3, 142.8, 142.7, 138.9, 137.8, 135.8, 134.9, 133.9, 130.0 (2C), 129.7 (2C), 129.5, 129.0 (2C), 128.7 (2C), 128.4, 128.2, 127.8 (2C), 127.8 (2C), 124.3, 114.9, 112.0, 111.7, 107.0, 64.2, 55.6, 53.6, 50.0, 49.8, 41.1, 39.8. The er was determined by UPC<sup>2</sup> using a chiral Chiralpack IB column gradient from 100%  $\text{CO}_2$  up to 40%; *i*-PrOH, flow rate = 2.2 mL/min  $\tau_{\text{major}} = 5.39$  min,  $\tau_{\text{minor}} = 6.61$  min, (>99:1 er).  $[\alpha]_{\text{D}}^{21} = +124.6$  ( $c = 1.0$ ,  $\text{CHCl}_3$ ). HRMS (ESI)  $m/z$   $[\text{M}+\text{H}]^+$  Calcd. for  $\text{C}_{38}\text{H}_{29}\text{N}_2\text{O}_2^+$ : 545.2223; found: 545.2211.

**(3*S*,4*aS*,9*bR*,10*R*,10*aR*)-2-formyl-8-methoxy-3,5,10-triphenyl-4*a*,9*b*,10,10*a*-tetrahydroindeno[2,1-*a*]indene-4,4(3*H*)-dicarbonitrile 3j**

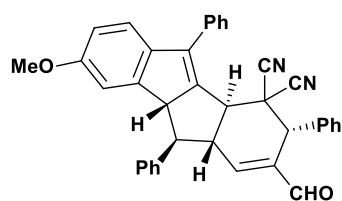

Following the general procedure product **3j** (20:1 dr in a crude reaction mixture) was isolated as a single diastereoisomer in 47% yield (25.6 mg) as yellow solid; mp = 162 °C.  $^1\text{H}$  NMR (700 MHz,  $\text{CDCl}_3$ )  $\delta$  9.35 (s, 1H), 7.59 – 7.54 (m, 4H), 7.53 – 7.38 (m, 4H), 7.28 (d,  $J = 7.2$  Hz, 2H), 7.22 – 7.17 (m, 1H), 7.15 (d,  $J = 1.1$  Hz, 1H), 7.09 (dd,  $J = 12.1, 5.0$  Hz, 3H), 7.01 (dd,  $J = 7.9, 1.0$  Hz, 2H), 6.79 (dd,  $J = 8.4, 2.4$  Hz, 1H), 6.58 (d,  $J = 2.3$  Hz, 1H), 4.61 (s, 1H), 4.29 (dd,  $J = 10.6, 2.0$  Hz, 1H), 3.99 (tt,  $J = 11.7, 2.0$  Hz, 1H), 3.86 (dd,  $J = 11.9, 2.4$  Hz, 1H), 3.70 (s, 3H), 2.80 (t,  $J = 11.3$  Hz, 1H).  $^{13}\text{C}$  NMR (176 MHz,  $\text{CDCl}_3$ )  $\delta$  190.5, 158.4, 148.3, 145.4, 142.7, 141.3, 139.0, 138.8, 137.6, 134.9, 134.2, 130.0 (2C), 129.7 (2C), 129.5, 129.0 (2C), 128.6 (2C), 128.4, 128.1, 127.9 (2C), 127.8 (2C), 122.0, 115.0, 112.6, 112.1, 110.8, 64.5, 55.6, 53.8, 49.8 (2C), 41.3, 39.8. The er was determined by UPC<sup>2</sup> using a chiral Chiralpack IC column gradient from 100%  $\text{CO}_2$  up to 40%; ACN, flow rate = 2.2 mL/min  $\tau_{\text{major}} = 4.91$  min,  $\tau_{\text{minor}} = 4.59$  min, (> 99:1 er).  $[\alpha]_{\text{D}}^{21} = +49.5$  ( $c = 1.0$ ,  $\text{CHCl}_3$ ). HRMS (ESI)  $m/z$   $[\text{M}+\text{H}]^+$  Calcd. for  $\text{C}_{38}\text{H}_{29}\text{N}_2\text{O}_2^+$ : 545.2223; found: 545.2206.

**(3*S*,4*aS*,9*bR*,10*R*,10*aR*)-2-formyl-7-methyl-3,5,10-triphenyl-4*a*,9*b*,10,10*a*-tetrahydroindeno[2,1-*a*]indene-4,4(3*H*)-dicarbonitrile 3k**

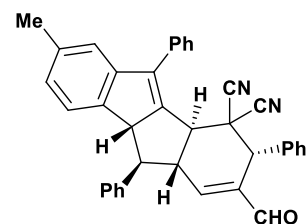

Following the general procedure product **3k** (>20:1 dr in a crude reaction mixture) was isolated as a single diastereoisomer in 54% yield (28.5 mg) as yellow solid; mp = 175 °C. NMR (700 MHz,  $\text{CDCl}_3$ )  $\delta$  9.35 (s, 1H),  $\delta$  7.61 – 7.54 (m, 4H), 7.52 – 7.40 (m, 4H), 7.30 – 7.27 (m, 2H), 7.25 – 7.18 (m, 1H), 7.16 – 7.14 (m, 1H), 7.10 (t,  $J = 7.7$  Hz, 2H), 7.04 – 6.98 (m, 3H), 6.95 – 6.87 (m, 2H), 4.61 (s, 1H), 4.31 (dd,  $J = 10.6, 1.9$  Hz, 1H), 4.00 (tt,  $J = 11.7, 1.9$  Hz, 1H),

3.86 (dd,  $J = 12.0, 2.2$  Hz, 1H), 2.77 (t,  $J = 11.0$  Hz, 1H), 2.29 (s, 3H).  $^{13}\text{C}$  NMR (176 MHz,  $\text{CDCl}_3$ )  $\delta$  190.5, 148.4, 148.3, 142.9, 141.6, 140.7, 138.9, 137.8, 137.7, 134.9, 134.1, 130.0 (2C), 129.6 (2C), 129.5, 129.0 (2C), 128.6 (2C), 128.4, 128.1, 127.9 (4C), 126.4, 123.4, 122.1, 114.9, 112.0, 64.5, 53.7, 49.9, 49.8, 41.2, 39.8, 21.6. The er was determined by UPC<sup>2</sup> using a chiral Chiralpack IB column gradient from 100%  $\text{CO}_2$  up to 40%; *i*-PrOH, flow rate = 2.2 mL/min  $\tau_{\text{major}} = 5.23$  min,  $\tau_{\text{minor}} = 6.72$  min, (> 99:1 er).  $[\alpha]_{\text{D}}^{21} = -46.5$  ( $c = 1.0$ ,  $\text{CHCl}_3$ ). HRMS (ESI)  $m/z$   $[\text{M}+\text{H}]^+$  Calcd. for  $\text{C}_{38}\text{H}_{29}\text{N}_2\text{O}^+$ : 529.2274; found: 529.2265.

**(3S,4aS,9bR,10R,10aR)-8-bromo-2-formyl-3,5,10-triphenyl-4a,9b,10,10a-tetrahydroindeno[2,1-a]indene-4,4(3H)-dicarbonitrile 3l**

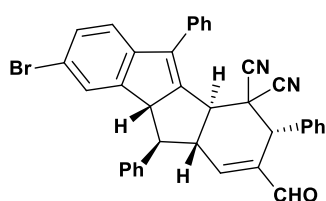

Following the general procedure product **3l** (20:1 dr in a crude reaction mixture) was isolated as a single diastereoisomer in 40% yield (23.7 mg) as yellow solid; mp = 169 °C.  $^1\text{H}$  NMR (700 MHz,  $\text{CDCl}_3$ )  $\delta$  9.35 (s, 1H), 7.61 – 7.58 (m, 2H), 7.56 – 7.54 (m, 2H), 7.53 – 7.50 (m, 1H), 7.50 – 7.46 (m, 1H), 7.46 – 7.43 (m, 2H), 7.38 (dd,  $J = 8.1, 1.9$  Hz, 1H), 7.29 – 7.26 (m, 2H), 7.21 (tt,  $J = 7.5, 1.3$  Hz, 1H), 7.14 – 7.11 (m, 2H), 7.11 – 7.07 (m, 2H), 7.04 (d,  $J = 8.1$  Hz, 1H), 6.99 – 6.97 (m, 2H), 4.61 (s, 1H), 4.33 (dd,  $J = 10.7, 2.4$  Hz, 1H), 3.97 (tt,  $J = 11.8, 2.1$  Hz, 1H), 3.85 (dd,  $J = 12.0, 2.4$  Hz, 1H), 2.82 (t,  $J = 11.2$  Hz, 1H).  $^{13}\text{C}$  NMR (176 MHz,  $\text{CDCl}_3$ )  $\delta$  190.4, 147.8, 147.1, 145.4, 142.2, 141.9, 139.0, 137.1, 134.8, 133.4, 130.9, 130.0 (2C), 129.9 (2C), 129.6, 129.1 (2C), 128.7 (2C), 128.7, 128.4, 127.8 (4C), 126.9, 122.8, 120.1, 114.8, 111.9, 64.3, 53.9, 49.8, 49.5, 41.0, 39.8. The er was determined by UPC<sup>2</sup> using a chiral Chiralpack IC column gradient from 100%  $\text{CO}_2$  up to 40%; *i*-PrOH, flow rate = 2.2 mL/min  $\tau_{\text{major}} = 5.70$  min,  $\tau_{\text{minor}} = 5.34$  min, (99:1 er).  $[\alpha]_{\text{D}}^{21} = +30.9$  ( $c = 1.0$ ,  $\text{CHCl}_3$ ). HRMS (ESI)  $m/z$   $[\text{M}+\text{H}]^+$  Calcd. for  $\text{C}_{37}\text{H}_{26}\text{BrN}_2\text{O}^+$ : 593.1223; found: 593.1204.

**(3S,4aS,9bS,10R,10aR)-9-bromo-2-formyl-3,5,10-triphenyl-4a,9b,10,10a-tetrahydroindeno[2,1-a]indene-4,4(3H)-dicarbonitrile 3m**

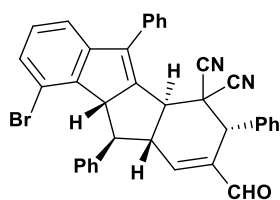

Following the general procedure product **3m** (20:1 dr in a crude reaction mixture) was isolated as a single diastereoisomer in 30% yield (17.8 mg) as yellow solid; mp = 210 °C.  $^1\text{H}$  NMR (700 MHz,  $\text{CDCl}_3$ )  $\delta$  9.30 (s, 1H), 7.79 (s, 1H), 7.60 – 7.55 (m, 1H), 7.49 – 7.41 (m, 5H), 7.35 – 7.30 (m, 1H), 7.28 (dd,  $J = 5.2, 3.6$  Hz, 2H), 7.25 (d,  $J = 1.8$  Hz, 1H), 7.21 (tt,  $J = 7.5, 1.3$  Hz, 1H), 7.12 – 7.07 (m, 4H), 7.01 – 6.98 (m, 3H), 4.59 (s, 1H), 4.49 (dd,  $J = 10.0, 2.3$  Hz, 1H),

4.06 (tt,  $J = 11.9, 2.1$  Hz, 1H), 3.83 (dd,  $J = 12.3, 2.3$  Hz, 1H), 2.84 (dd,  $J = 11.8, 10.1$  Hz, 1H).  $^{13}\text{C}$  NMR (176 MHz,  $\text{CDCl}_3$ )  $\delta$  190.40, 149.93, 148.11, 143.42, 143.06, 142.34, 138.96, 138.68, 134.88, 133.38, 130.21, 130.01 (2C), 129.52, 129.37 (4C), 129.01 (2C), 128.73 (2C), 128.44, 128.41, 127.87 (2C), 126.30, 120.33, 119.29, 114.79, 111.83, 66.43, 54.66, 50.56, 49.77, 41.17, 39.00. The er was determined by UPC<sup>2</sup> using a chiral Chiralpack IB column gradient from 100%  $\text{CO}_2$  up to 40%; *i*-PrOH, flow rate = 2.2 mL/min  $\tau_{\text{major}} = 4.43$  min,  $\tau_{\text{minor}} = 6.50$  min, (> 99:1 er).  $[\alpha]_{\text{D}}^{21} = + 99.5$  ( $c = 1.0, \text{CHCl}_3$ ). HRMS (ESI)  $m/z$   $[\text{M}+\text{H}]^+$  Calcd. for  $\text{C}_{37}\text{H}_{26}\text{BrN}_2\text{O}^+$ : 593.1223; found: 593.1217.

**(3*S*,4*aS*,9*bR*,10*R*,10*aR*)-2-formyl-5-(4-methoxyphenyl)-3,10-diphenyl-4*a*,9*b*,10,10*a*-tetrahydroindeno[2,1-*a*]indene-4,4(3*H*)-dicarbonitrile **3n****

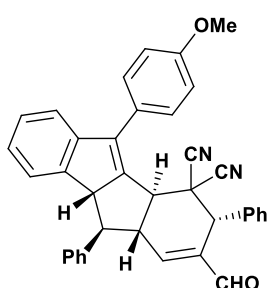

Following the general procedure product **3n** (20:1 dr in a crude reaction mixture) was isolated as a single diastereoisomer in 46% yield (25.1 mg) as yellow solid; mp = 173 °C.  $^1\text{H}$  NMR (700 MHz,  $\text{CDCl}_3$ )  $\delta$  9.35 (s, 1H), 7.59 – 7.54 (m, 4H), 7.47 – 7.44 (m, 2H), 7.45 (dd,  $J = 11.4, 4.5$  Hz, 2H), 7.29 (d,  $J = 7.2$  Hz, 2H), 7.25 – 7.24 (m, 1H), 7.21 (d,  $J = 7.6$  Hz, 1H), 7.16 (d,  $J = 1.2$  Hz, 1H), 7.10 (td,  $J = 7.4, 1.1$  Hz, 1H), 7.00 (d,  $J = 7.5$  Hz, 1H), 6.94 – 6.91 (m, 2H), 6.60 (t,  $J = 5.7$  Hz, 2H), 4.63 (s, 1H), 4.33 (dd,  $J = 10.6, 2.2$  Hz, 1H), 4.01 (tt,  $J = 11.8, 2.0$  Hz, 1H), 3.85 (dd,  $J = 11.9, 2.3$  Hz, 1H), 3.73 (s, 3H), 2.78 (t,  $J = 11.1$  Hz, 1H).  $^{13}\text{C}$  NMR (176 MHz,  $\text{CDCl}_3$ )  $\delta$  190.5, 159.4, 148.4 (2C), 143.6, 142.6, 141.1, 139.0, 137.8, 134.9, 130.1 (2C), 129.7 (2C), 129.5, 129.0 (2C), 129.0 (2C), 128.4, 127.9 (2C), 127.7, 126.2, 125.5, 123.7, 121.5, 115.0, 114.1 (2C), 112.1, 64.7, 55.3, 53.9, 49.8, 49.8, 41.2, 39.8. The er was determined by UPC<sup>2</sup> using a chiral Chiralpack IB column gradient from 100%  $\text{CO}_2$  up to 40%; *i*-PrOH, flow rate = 2.2 mL/min  $\tau_{\text{major}} = 5.38$  min,  $\tau_{\text{minor}} = 6.61$  min, (> 99:1 er).  $[\alpha]_{\text{D}}^{21} = - 39.6$  ( $c = 1.0, \text{CHCl}_3$ ). HRMS (ESI)  $m/z$   $[\text{M}+\text{H}]^+$  Calcd. for  $\text{C}_{38}\text{H}_{29}\text{N}_2\text{O}_2^+$ : 545.2223; found: 545.2211.

**(3*S*,4*aS*,9*bR*,10*R*,10*aR*)-5-(4-fluorophenyl)-2-formyl-3,10-diphenyl-4*a*,9*b*,10,10*a*-tetrahydroindeno[2,1-*a*]indene-4,4(3*H*)-dicarbonitrile 3o**

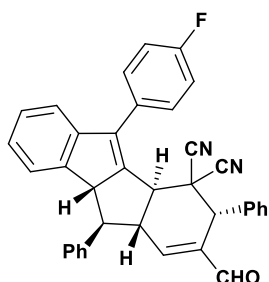

Following the general procedure product **3o** (20:1 dr in a crude reaction mixture) was isolated as a single diastereoisomer in 56% yield (29.8 mg) as yellow solid; mp = 176 °C. <sup>1</sup>H NMR (700 MHz, CDCl<sub>3</sub>) δ 9.35 (s, 1H), 7.60 – 7.55 (m, 4H), 7.52 – 7.48 (m, 2H), 7.45 (t, *J* = 7.4 Hz, 2H), 7.27 (t, *J* = 7.1 Hz, 3H), 7.15 (d, *J* = 7.6 Hz, 2H), 7.12 (td, *J* = 7.5, 0.9 Hz, 1H), 7.01 (d, *J* = 7.4 Hz, 1H), 6.98 (dd, *J* = 8.4, 5.3 Hz, 2H), 6.78 (t, *J* = 8.7 Hz, 2H), 4.63 (s, 1H), 4.34 (dd, *J* = 10.6, 2.1 Hz, 1H), 4.01 (tt, *J* = 11.7, 2.0 Hz, 1H), 3.81 (dd, *J* = 11.9, 2.3 Hz, 1H), 2.82 – 2.78 (m, 1H). <sup>13</sup>C NMR (176 MHz, CDCl<sub>3</sub>) δ 190.4, 162.6 (d, *J* = 247.4 Hz), 148.1, 148.1, 143.5, 141.9, 141.9, 138.9, 137.6, 134.8, 130.0 (2C), 129.9 (d, *J* = 3.4 Hz), 129.7 (2C), 129.6 (d, *J* = 8.2 Hz, 2C), 129.6, 129.0 (2C), 128.5, 127.9 (2C), 127.8, 125.8, 123.8, 121.3, 115.7 (d, *J* = 21.6 Hz, 2C), 114.8, 112.2, 64.8, 53.8, 49.7, 49.7, 41.1, 39.9. <sup>19</sup>F NMR (376 MHz, CDCl<sub>3</sub>) δ -113.0. The er was determined by UPC<sup>2</sup> using a chiral Chiralpack IB column gradient from 100% CO<sub>2</sub> up to 40%; *i*-PrOH, flow rate = 2.2 mL/min τ<sub>major</sub> = 5.13. min, τ<sub>minor</sub> = 6.12 min, (> 99:1 er). [α]<sub>D</sub><sup>21</sup> = -19.5 (c = 1.0, CHCl<sub>3</sub>). HRMS (ESI) *m/z* [M+H]<sup>+</sup> Calcd. for C<sub>37</sub>H<sub>26</sub>FN<sub>2</sub>O<sup>+</sup>: 533.2024; found: 533.2017.

**(3*S*,4*aS*,9*bR*,10*R*,10*aR*)-5-([1,1'-biphenyl]-4-yl)-2-formyl-3,10-diphenyl-4*a*,9*b*,10,10*a*-tetrahydroindeno[2,1-*a*]indene-4,4(3*H*)-dicarbonitrile 3p**

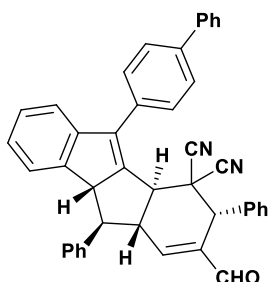

Following the general procedure product **3p** (20:1 dr in a crude reaction mixture) was isolated as a single diastereoisomer in 49% yield (28.9 mg) as yellow solid; mp = 226 °C. <sup>1</sup>H NMR (700 MHz, CDCl<sub>3</sub>) δ 9.36 (s, 1H), 7.58 (d, *J* = 4.5 Hz, 4H), 7.52 – 7.49 (m, 4H), 7.48 – 7.45 (m, 2H), 7.45 – 7.41 (m, 2H), 7.34 (ddt, *J* = 7.8, 6.9, 1.3 Hz, 1H), 7.32 – 7.29 (m, 4H), 7.28 – 7.26 (m, 2H), 7.17 (dd, *J* = 2.3, 1.1 Hz, 1H), 7.14 – 7.10 (m, 1H), 7.09 – 7.07 (m, 2H), 7.05 – 7.01 (m, 1H), 4.64 (s, 1H), 4.37 (dd, *J* = 10.7, 2.9 Hz, 1H), 4.04 (tt, *J* = 11.8, 2.1 Hz, 1H), 3.90 (dd, *J* = 11.9, 2.4 Hz, 1H), 2.82 (dd, *J* = 11.7, 10.6 Hz, 1H). <sup>13</sup>C NMR (176 MHz, CDCl<sub>3</sub>) δ 190.49, 148.33, 148.12, 143.62, 142.64, 141.65, 140.99, 140.94, 138.98, 137.70, 134.91, 132.83, 130.13 (2C), 129.68 (2C), 129.52, 129.02 (2C), 128.81 (2C), 128.45, 128.25 (2C), 127.89 (2C), 127.78, 127.42, 127.34 (2C), 127.23 (2C), 125.66, 123.76, 121.55, 114.98, 112.07, 64.81, 53.92, 49.83, 49.80, 41.23, 39.86. The er was determined by UPC<sup>2</sup> using a chiral Chiralpack IA

column gradient from 100% CO<sub>2</sub> up to 40%; *i*-PrOH, flow rate = 2.2 mL/min  $\tau_{\text{major}} = 4.50$  min,  $\tau_{\text{minor}} = 4.28$  min, (> 99:1 er).  $[\alpha]_{\text{D}}^{21} = +96.2$  (c = 1.0, CHCl<sub>3</sub>). HRMS (ESI) m/z [M+H]<sup>+</sup> Calcd. for C<sub>43</sub>H<sub>31</sub>N<sub>2</sub>O<sup>+</sup>: 591.2431; found: 591.2429.

**(3S,4aS,9bR,10R,10aR)-2-formyl-5-(5-methylthiophen-2-yl)-3,10-diphenyl-4a,9b,10,10a-tetrahydroindeno[2,1-a]indene-4,4(3H)-dicarbonitrile 3q**

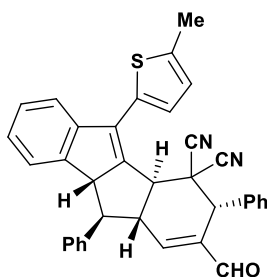

Following the general procedure product **3q** (20:1 dr in a crude reaction mixture) was isolated as a single diastereoisomer in 47% yield (25.1 mg) as orange solid; mp = 148 °C. <sup>1</sup>H NMR (700 MHz, CDCl<sub>3</sub>)  $\delta$  9.36 (s, 1H), 7.57 – 7.53 (m, 4H), 7.50 – 7.44 (m, 4H), 7.43 (dt, *J* = 7.7, 0.9 Hz, 1H), 7.36 – 7.32 (m, 2H), 7.29 (td, *J* = 7.6, 1.4 Hz, 1H), 7.16 (dd, *J* = 2.3, 1.1 Hz, 1H), 7.11 (td, *J* = 7.5, 1.1 Hz, 1H), 6.98 (dq, *J* = 7.6, 1.0 Hz, 1H), 6.66 (d, *J* = 3.4 Hz, 1H), 6.54 (dq, *J* = 3.3, 1.1 Hz, 1H), 4.67 (s, 1H), 4.32 (dd, *J* = 10.6, 2.4 Hz, 1H), 4.04 (tt, *J* = 11.8, 2.1 Hz, 1H), 3.85 (dd, *J* = 11.9, 2.4 Hz, 1H), 2.77 (dd, *J* = 11.7, 10.5 Hz, 1H), 2.28 (d, *J* = 1.1 Hz, 3H). <sup>13</sup>C NMR (176 MHz, CDCl<sub>3</sub>)  $\delta$  190.5, 148.4, 147.6, 143.5, 143.3, 140.4, 139.0, 137.6, 137.1, 134.8, 131.5, 130.3 (2C), 129.7 (2C), 129.4, 129.1 (2C), 128.4, 127.9 (2C), 127.8, 127.2, 125.8, 125.5, 123.8, 121.6, 115.1, 112.0, 64.6, 54.0, 49.9, 49.8, 41.5, 40.0, 15.0. The er was determined by UPC<sup>2</sup> using a chiral Chiralpack IB column gradient from 100% CO<sub>2</sub> up to 40%; *i*-PrOH, flow rate = 2.2 mL/min  $\tau_{\text{major}} = 5.35$  min,  $\tau_{\text{minor}} = 6.85$  min, (> 99:1 er).  $[\alpha]_{\text{D}}^{21} = +125.0$  (c = 1.0, CHCl<sub>3</sub>). HRMS (ESI) m/z [M+H]<sup>+</sup> Calcd. for C<sub>36</sub>H<sub>27</sub>N<sub>2</sub>O<sup>+</sup>: 535.1839; found: 535.1836.

**(3S,4aS,9bS,10R,10aR)-2-formyl-3,10-diphenyl-4a,9b,10,10a-tetrahydroindeno[2,1-a]indene-4,4(3H)-dicarbonitrile 3r**

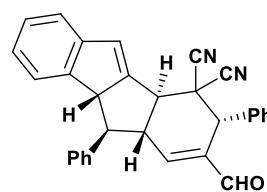

Following the general procedure product **3r** (20:1 dr in a crude reaction mixture) was isolated as a single diastereoisomer in 56% yield (24.6 mg) as yellow solid; mp = 158 °C. <sup>1</sup>H NMR (700 MHz, CDCl<sub>3</sub>)  $\delta$  9.33 (s, 1H), 7.59 – 7.52 (m, 4H), 7.50 – 7.46 (m, 1H), 7.45 – 7.39 (m, 3H), 7.35 (d, *J* = 7.6 Hz, 1H), 7.30 – 7.26 (m, 3H), 7.12 (dd, *J* = 2.3, 1.3 Hz, 1H), 7.07 (td, *J* = 7.4, 1.2 Hz, 1H), 7.00 (dt, *J* = 7.6, 1.0 Hz, 1H), 6.93 (t, *J* = 2.4 Hz, 1H), 4.70 (s, 1H), 4.24 (dt, *J* = 10.9, 2.6 Hz, 1H), 3.77 (tt, *J* = 11.8, 2.1 Hz, 1H), 3.32 (dt, *J* = 12.2, 2.4 Hz, 1H), 2.78 (t, *J* = 11.1 Hz, 1H). <sup>13</sup>C NMR (176 MHz, CDCl<sub>3</sub>)  $\delta$  190.5, 147.7, 147.6, 146.8, 143.8, 139.1, 137.6, 135.2, 129.9, 129.8 (2C), 129.7, 129.7 (2C), 129.3 (2C), 128.4, 127.8, 127.8 (2C), 125.3, 123.7, 122.4, 114.4, 113.2, 65.6, 52.4, 49.4, 48.9, 41.3, 40.9. The er was determined by UPC<sup>2</sup> using a chiral Chiralpack IB column



gradient from 100% CO<sub>2</sub> up to 40%; *i*-PrOH, flow rate = 2.2 mL/min  $\tau_{\text{major}} = 4.82$  min,  $\tau_{\text{minor}} = 5.41$  min, (> 99:1 er).  $[\alpha]_{\text{D}}^{21} = + 83.3$  (c = 1.0, CHCl<sub>3</sub>). HRMS (ESI) m/z [M+Na]<sup>+</sup> Calcd. for C<sub>31</sub>H<sub>22</sub>N<sub>2</sub>ONa<sup>+</sup>: 461.1625; found: 461.1618.

**4. Enantioselective synthesis of (3*S*,4*aS*,9*bR*,10*R*,10*aR*)-2-formyl-3,5,10-triphenyl-4*a*,9*b*,10,10*a*-tetrahydroindeno[2,1-*a*]indene-4,4(3*H*)-dicarbonitrile **3a** on a 1 mmol scale**

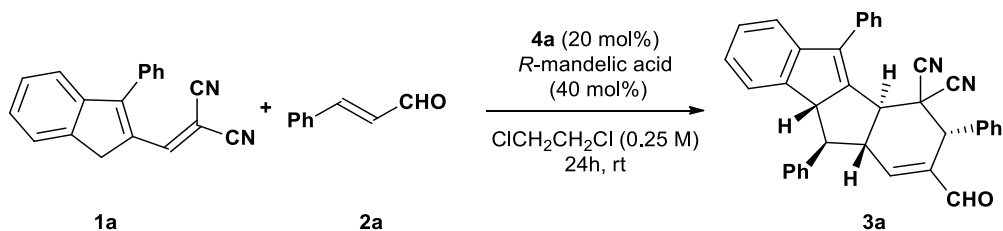

In an ordinary 8 mL glass vial equipped with a magnetic stirring, malononitrile **1a** (1 mmol),  $\alpha,\beta$ -unsaturated aldehyde **2a** (1 mmol) and *R*-mandelic acid (0.4 mmol) were dissolved in DCE (4 mL) and catalyst **4a** (66 mg, 0.2 mmol) was added. The reaction mixture was stirred in room temperature for 24h. After this time, the reaction mixture was directly subjected to column chromatography on silica gel (hexanes: ethyl acetate 80:20) to afford pure product **3a**.

## 5. Selective transformations of products 3

### 5.1. Selective reduction of aldehyde 3a

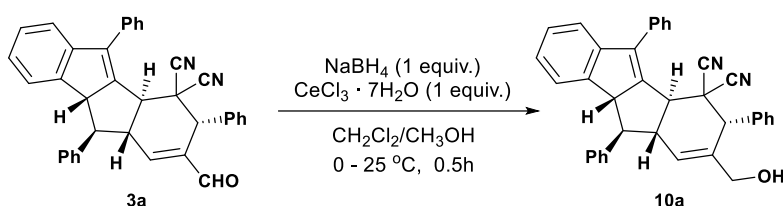

In an ordinary 4 mL glass vial equipped with a magnetic stirring bar, the aldehyde **3a** (0.1 mmol, 1.0 equiv.) and  $\text{CeCl}_3 \cdot 7\text{H}_2\text{O}$  (0.1 mmol, 1.0 equiv.) were dissolved in the mixture of  $\text{CH}_2\text{Cl}_2$  (0.2 mL) and MeOH (0.2 mL). Then  $\text{NaBH}_4$  (0.1 mmol, 1.0 equiv.) was added to the cold reaction mixture and was stirred at room temperature for 30 minutes. After full conversion of the starting material **3a** (as confirmed by TLC analysis), the reaction mixture was directly subjected to column chromatography on silica gel (eluent: hexanes/ethyl acetate 80:20) to afford pure product **10a** in 94 % yield (48.5 mg) as light-yellow solid; mp = 152°C.

#### **(3*S*,4*aS*,9*bR*,10*R*,10*aR*)-2-(Hydroxymethyl)-3,5,10-triphenyl-4*a*,9*b*,10,10*a*-tetrahydroindeno [2,1-*a*]indene-4,4(3*H*)-dicarbonitrile **10a****

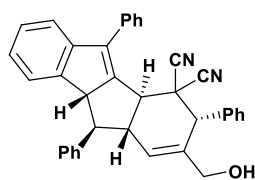

$^1\text{H}$  NMR (700 MHz,  $\text{CDCl}_3$ )  $\delta$  7.55 – 7.51 (m, 4H), 7.51 – 7.46 (m, 3H), 7.44 (ddd,  $J = 8.5, 6.3, 2.2$  Hz, 1H), 7.36 (d,  $J = 7.2$  Hz, 2H), 7.24 (t,  $J = 7.4$  Hz, 1H), 7.22 – 7.17 (m, 2H), 7.12 – 7.07 (m, 3H), 7.05 (d,  $J = 7.0$  Hz, 2H), 7.00 (d,  $J = 7.5$  Hz, 1H), 6.19 (s, 1H), 4.31 (dd,  $J = 10.6, 1.9$  Hz, 1H), 4.27 (s, 1H), 3.87 (dd,  $J = 12.9, 3.7$  Hz, 1H), 3.82 (dt,  $J = 11.8, 7.6$  Hz, 2H), 3.73 (dd,  $J = 11.8, 2.0$  Hz, 1H), 2.66 (t,  $J = 11.1$  Hz, 1H), 1.37 (dd,  $J = 6.8, 5.1$  Hz, 1H).  $^{13}\text{C}$  NMR (176 MHz,  $\text{CDCl}_3$ )  $\delta$  148.4, 143.8, 143.2, 141.9, 138.6, 135.9, 135.1, 134.3, 130.6 (2C), 129.5, 129.4 (2C), 129.1 (2C), 128.5 (2C), 128.0 (2C), 128.0, 127.9 (3C), 127.5, 125.9, 125.3, 123.7, 121.3, 115.5, 112.6, 64.8, 64.7, 52.6 (2C), 50.2, 41.6, 40.1.  $[\alpha]_{\text{D}}^{21} = +115.0$  ( $c = 1.0, \text{CHCl}_3$ ). HRMS (ESI)  $m/z$   $[\text{M}+\text{H}]^+$  Calcd. for  $\text{C}_{37}\text{H}_{29}\text{N}_2\text{O}^+$ : 517.2274; found: 517.2268.

## 5.2. Selective Suzuki coupling of aldehyde **3I**

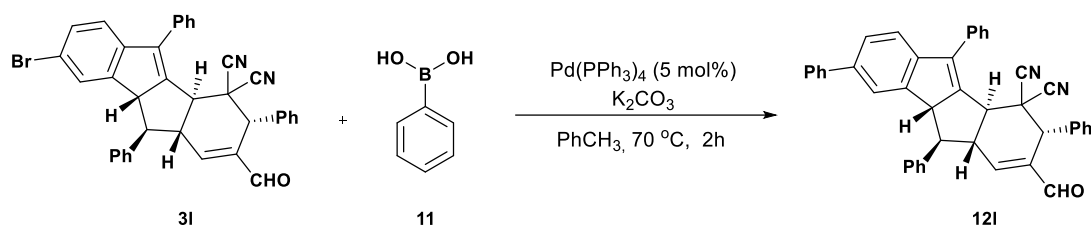

In an ordinary 4 mL glass vial equipped with a magnetic stirring bar and a screw septum cap, the Pd(PPh<sub>3</sub>)<sub>4</sub> (0.005 mmol, 0.05 equiv.) was placed. The vial was evacuated and filled with argon. Phenylboronic acid **11** (0.11 mmol, 1.1 equiv.) was dissolved in the mixture of PhCH<sub>3</sub> (0.4 mL) and EtOH (0.1 mL), the solution was degassed and then was added *via* syringe to the reaction vial. Aldehyde **3I** (0.1 mmol, 1.0 equiv.) was dissolved in the PhCH<sub>3</sub> (0.5 mL), the solution was degassed and then was added *via* syringe to the reaction vial. Then, degassed, aqueous solution of K<sub>2</sub>CO<sub>3</sub> (2M, 50 μL) was added and the reaction mixture was stirred at 70 °C for 2h. After full conversion of the starting material **3I** (as confirmed by TLC analysis), the mixture was cooled to rt, quenched with brine (5 mL), extracted with CHCl<sub>3</sub> (3×5 mL), dried over anhydrous sodium sulfate, filtered and concentrated under reduced pressure. The resulting solid was subjected to column chromatography on silica gel (eluent: hexanes/ethyl acetate 80:20) to afford pure product **12I** in 62 % yield (36.6 mg) as brown solid; mp = 160 °C.

### **(3S,4aS,9bR,10R,10aR)-2-formyl-3,5,8,10-tetraphenyl-4a,9b,10,10a-tetrahydroindeno[2,1-a]indene-4,4(3H)-dicarbonitrile **12I****

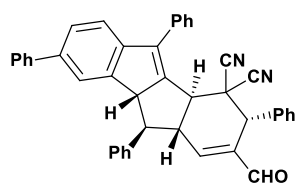

<sup>1</sup>H NMR (700 MHz, CDCl<sub>3</sub>) δ 9.36 (s, 1H), 7.61 – 7.57 (m, 4H), 7.53 – 7.47 (m, 3H), 7.48 – 7.44 (m, 4H), 7.41 – 7.38 (m, 2H), 7.33 – 7.29 (m, 3H), 7.27 (dd, *J* = 8.0, 0.6 Hz, 1H), 7.26 – 7.21 (m, 2H), 7.17 (dd, *J* = 2.2, 1.1 Hz, 1H), 7.12 (t, *J* = 7.8 Hz, 2H), 7.06 – 7.04 (m, 2H), 4.64 (s, 1H), 4.42 (dd, *J* = 10.6, 2.5 Hz, 1H), 4.04 (tt, *J* = 11.8, 2.0 Hz, 1H), 3.91 (dd, *J* = 12.0, 2.4 Hz, 1H), 2.88 (dd, *J* = 11.6, 10.6 Hz, 1H). <sup>13</sup>C NMR (176 MHz, CDCl<sub>3</sub>) δ 190.4, 148.2, 147.4, 144.3, 142.7, 141.7, 141.2, 139.0, 138.9, 137.6, 134.9, 133.9, 130.0 (2C), 129.7 (2C), 129.5, 129.0 (2C), 128.9 (2C), 128.7 (2C), 128.5, 128.2, 127.8 (2C), 127.8 (2C), 127.3, 127.3 (2C), 127.0, 122.5, 121.7, 114.9, 112.0, 64.8, 53.8, 49.8, 49.7, 41.2, 39.9. [α]<sub>D</sub><sup>21</sup> = + 224.7 (c = 1.0, CHCl<sub>3</sub>). HRMS (ESI) *m/z* [M+H]<sup>+</sup> Calcd. for C<sub>46</sub>H<sub>31</sub>N<sub>2</sub>O<sup>+</sup>: 591.2431; found: 591.2430.

## 6. Crystal and X-ray data for (3*S*,4*aS*,9*bS*,10*R*,10*aR*)-9-bromo-2-formyl-3,5,10-triphenyl-4*a*,9*b*,10,10*a*-tetrahydroindeno[2,1-*a*]indene-4,4(3*H*)-dicarbonitrile **3m**

The crystal structure of the compound **3m**, C<sub>37</sub>H<sub>25</sub>BrN<sub>2</sub>O · CHCl<sub>3</sub>, was established by single-crystal X-ray diffraction at 100 K. The compound crystallizes in the non-centrosymmetric orthorhombic space group *P*2<sub>1</sub>2<sub>1</sub>2<sub>1</sub> (*Z* = 4), with one crystallographically independent formula unit per unit cell (Figure 1).

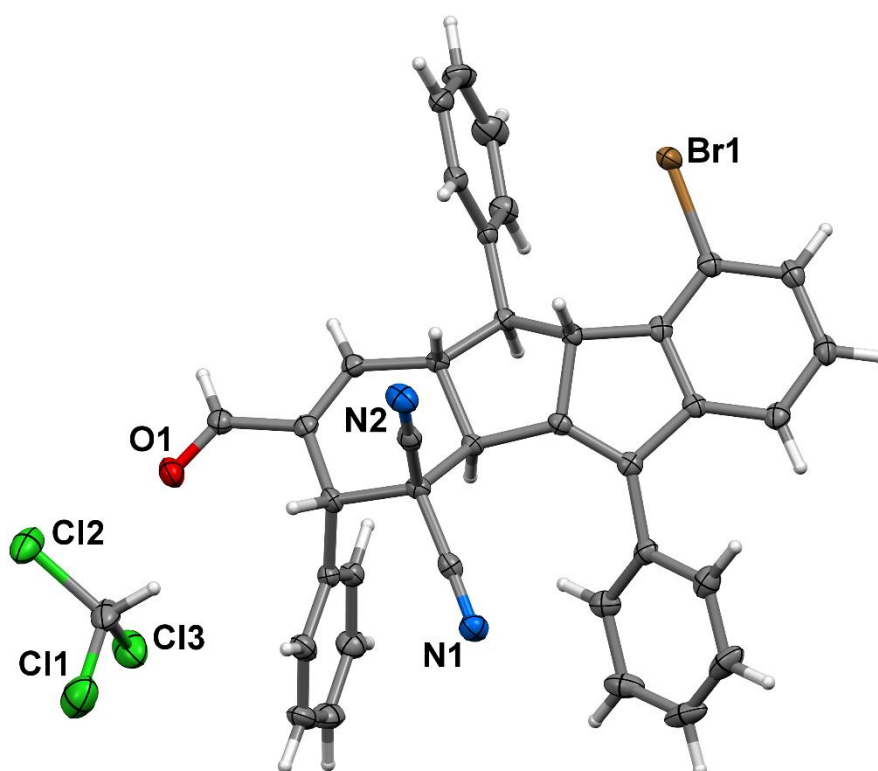

Figure 1. The molecular structure of the compound **3m** at 100 K, showing 50% probability displacement ellipsoids. Hydrogen atoms are drawn with an arbitrary radius.

Single crystal X-ray diffraction data were collected at 100 K by the  $\omega$ -scan technique using a RIGAKU XtaLAB Synergy, Dualflex, Pilatus 300K diffractometer<sup>3</sup> with PhotonJet micro-focus X-ray Source Cu-K $\alpha$  ( $\lambda = 1.54184 \text{ \AA}$ ). Data collection, cell refinement, data reduction and absorption correction were performed using CrysAlis PRO software.<sup>3</sup> The crystal structure was

<sup>3</sup> Rigaku OD. CrysAlis PRO. Rigaku Oxford Diffraction Ltd, Yarnton, Oxfordshire, England, 2019.

solved using direct methods and the SHELXT 2018/2 program,<sup>4</sup> with atomic scattering factors taken from the International Tables for X-ray Crystallography. Positional parameters of non-H-atoms were refined by a full-matrix least-squares method on  $F^2$  with anisotropic thermal parameters by using the SHELXL 2019/3 program.<sup>5</sup> All hydrogen atoms were found from the difference Fourier maps and for further calculations they were positioned geometrically in calculated positions ( $C-H = 0.95-1.00 \text{ \AA}$ ) and constrained to ride on their parent atoms with isotropic displacement parameters set to 1.2 times the  $U_{eq}$  of the parent atom.

**3m:** Formula  $C_{38}H_{26}Cl_3BrN_2O$ , orthorhombic, space group  $P2_12_12_1$ ,  $Z = 4$ , unit cell constants  $a = 10.9432(1)$ ,  $b = 15.0034(1)$ ,  $c = 19.5901(1) \text{ \AA}$ ,  $V = 3216.41(4) \text{ \AA}^3$ . The integration of the data yielded a total of 117789 reflections with  $\theta$  angles in the range of 3.71 to 67.73°, of which 5828 were unique ( $R_{int} = 2.54\%$ ). The final anisotropic full-matrix least-squares refinement on  $F^2$  with 406 parameters. The final  $R_1$  was 0.0181 (for  $I > 2\sigma(I)$ ) and  $wR_2$  was 0.0467 (all data). The largest peak in the final difference electron density synthesis was  $0.279 \text{ e\AA}^{-3}$  and the largest hole was  $-0.281 \text{ e\AA}^{-3}$ . The goodness-of-fit was 1.084. The absolute configuration was unambiguously established from anomalous scattering, by calculating the  $x$  Flack parameter<sup>6</sup> of  $-0.0070(18)$  using 2538 quotients.

**CCDC 2279932** contains the supplementary crystallographic data for this paper. These data can be obtained free of charge from The Cambridge Crystallographic Data Centre via [www.ccdc.cam.ac.uk/structures](http://www.ccdc.cam.ac.uk/structures).

---

<sup>4</sup> Sheldrick, G.M. "SHELXT - integrated space-group and crystal-structure determination", *Acta Cryst.* 2015, **A71**, 3-8.

<sup>5</sup> Sheldrick, G.M. "Crystal structure refinement with SHELXL", *Acta Cryst.* 2015, **C71**, 3-8.

<sup>6</sup> Parsons, S.; Flack, H.D.; Wagner, T. "Use of intensity quotients and differences in absolute structure refinement" *Acta Cryst.* 2013, **B69**, 249-259.

## 7. NMR spectra

### 2-((3-phenyl-1H-inden-2-yl)methylene)malononitrile 1a <sup>1</sup>H NMR (700 MHz, CDCl<sub>3</sub>)

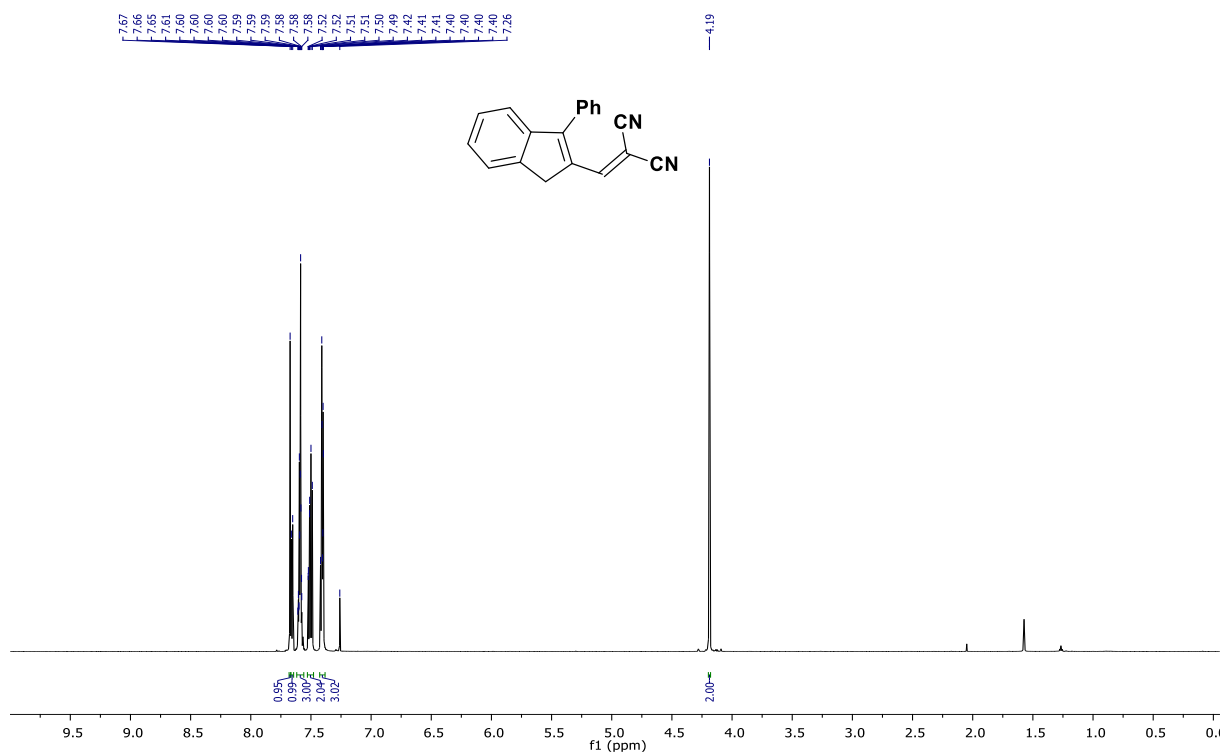

### <sup>13</sup>C NMR (176 MHz, CDCl<sub>3</sub>)

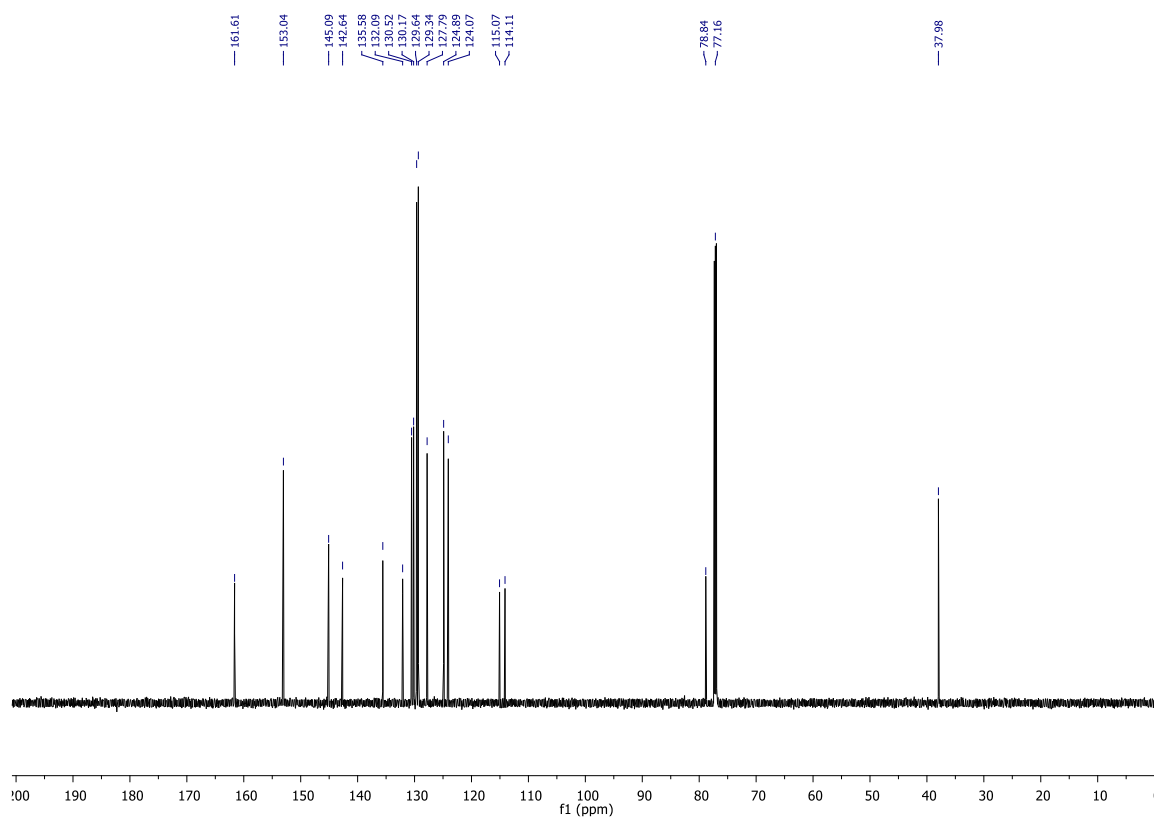

# 2-((5-methoxy-3-phenyl-1H-inden-2-yl)methylene)malononitrile 1b

<sup>1</sup>H NMR (700 MHz, CDCl<sub>3</sub>)

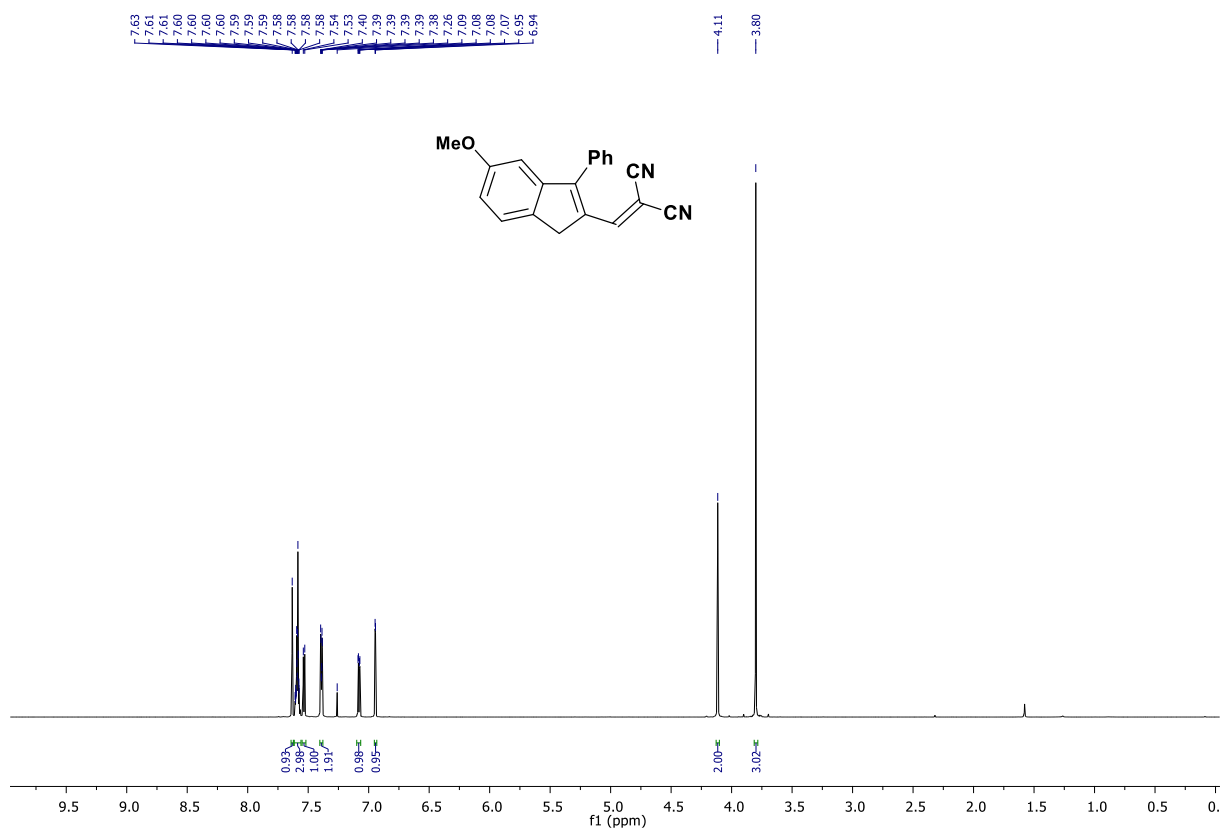

<sup>13</sup>C NMR (176 MHz, CDCl<sub>3</sub>)

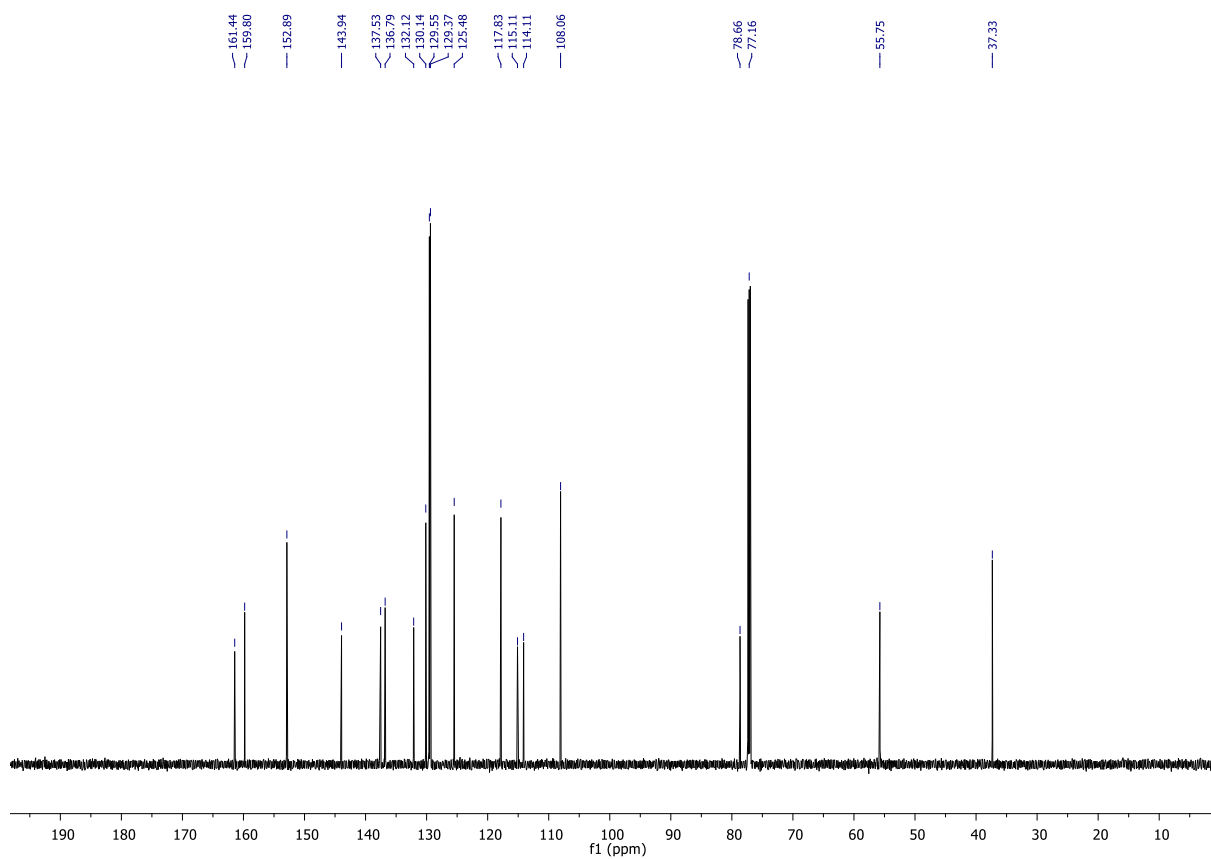



# 2-((6-methoxy-3-phenyl-1H-inden-2-yl)methylene)malononitrile 1c

<sup>1</sup>H NMR (700 MHz, CDCl<sub>3</sub>)

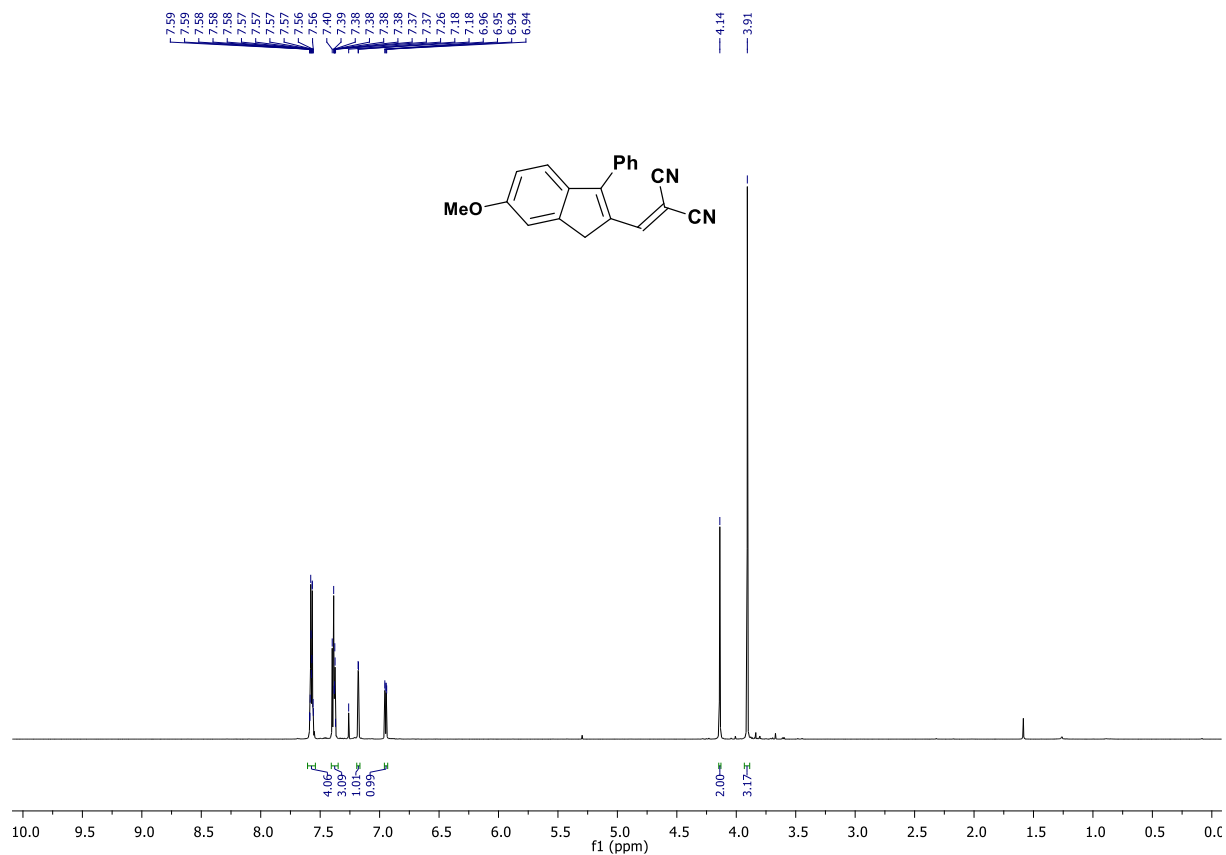

<sup>13</sup>C NMR (176 MHz, CDCl<sub>3</sub>)

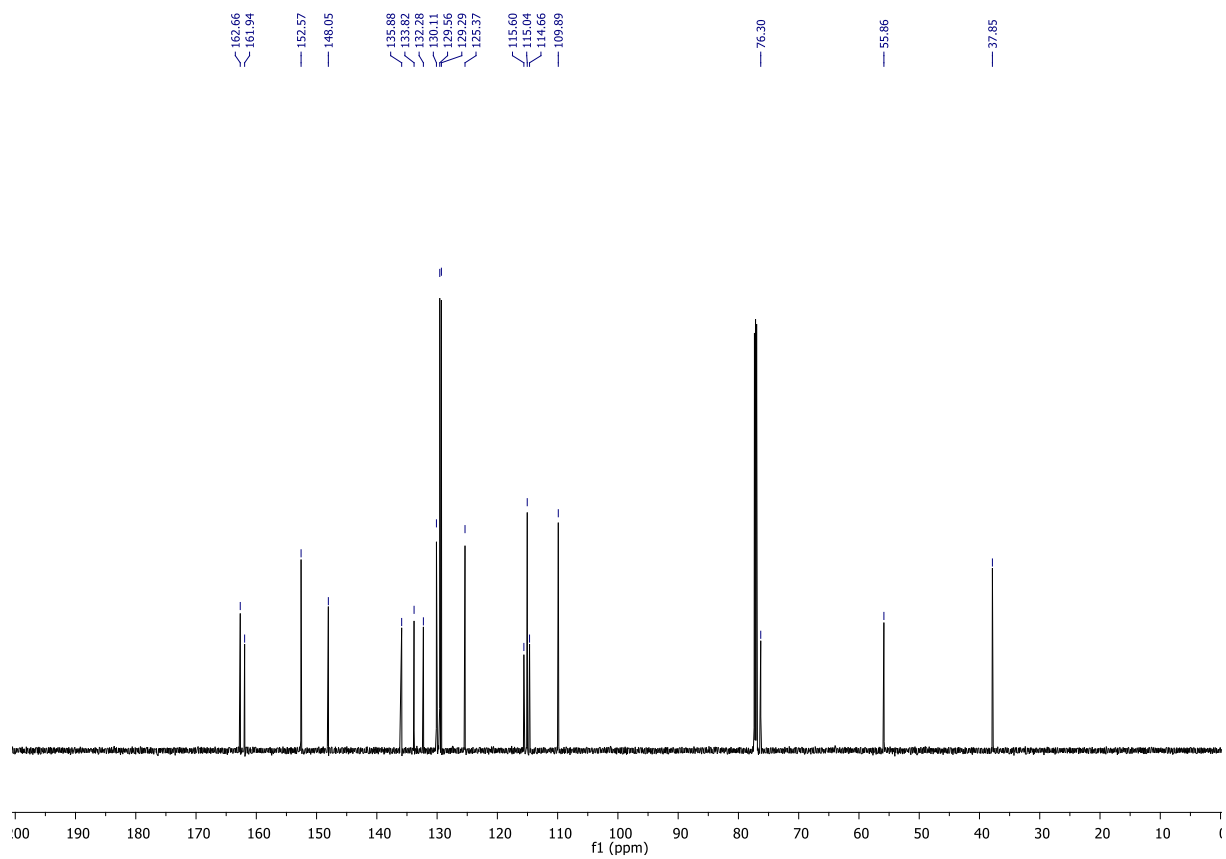

# 2-((5-methyl-3-phenyl-1H-inden-2-yl)methylene)malononitrile 1d

<sup>1</sup>H NMR (700 MHz, CDCl<sub>3</sub>)

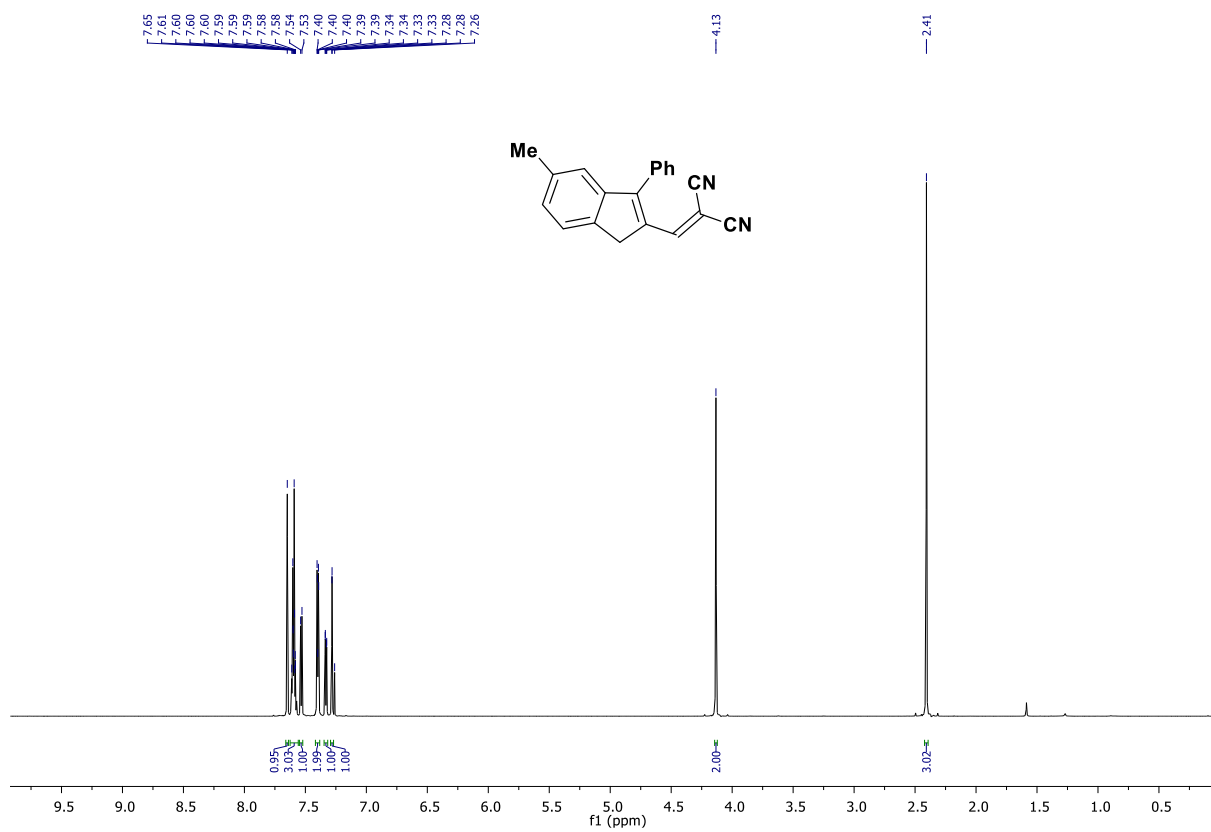

<sup>13</sup>C NMR (176 MHz, CDCl<sub>3</sub>)

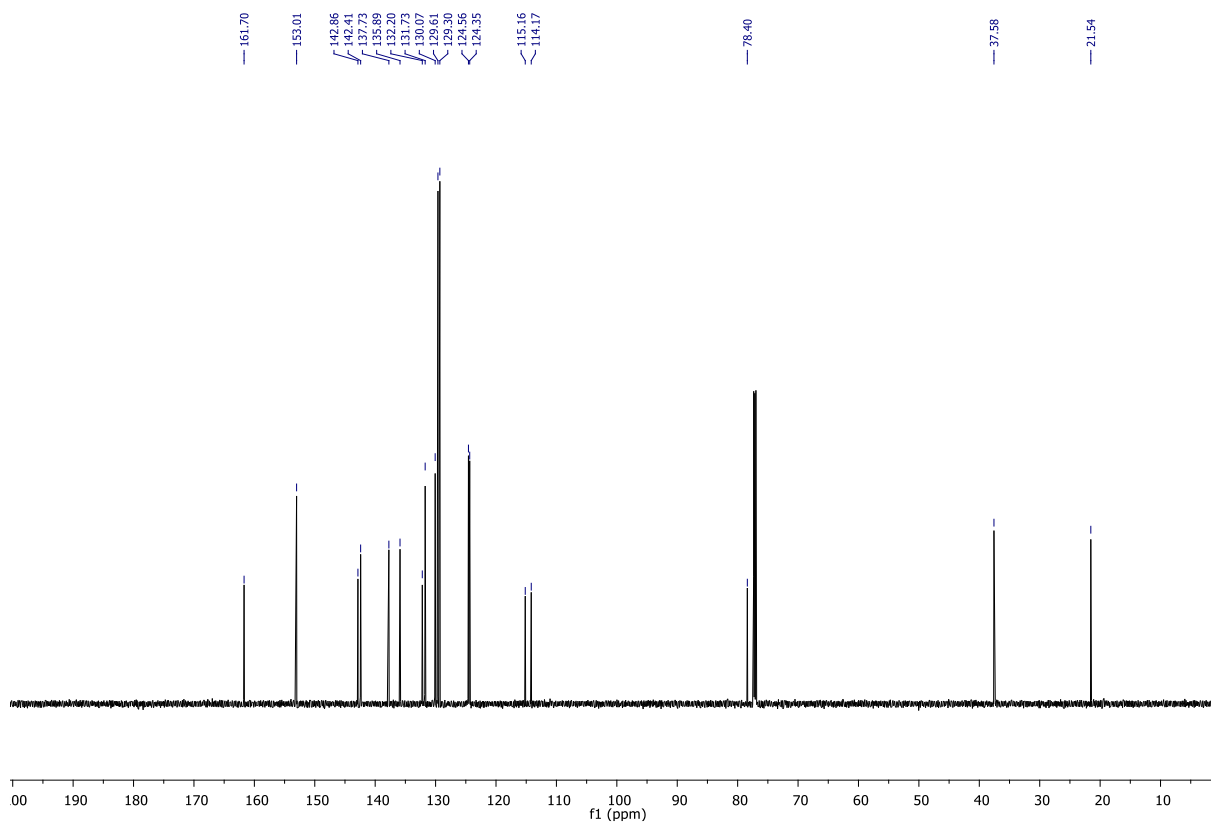

## 2-((6-bromo-3-phenyl-1H-inden-2-yl)methylene)malononitrile 1e

$^1\text{H}$  NMR (700 MHz,  $\text{CDCl}_3$ )

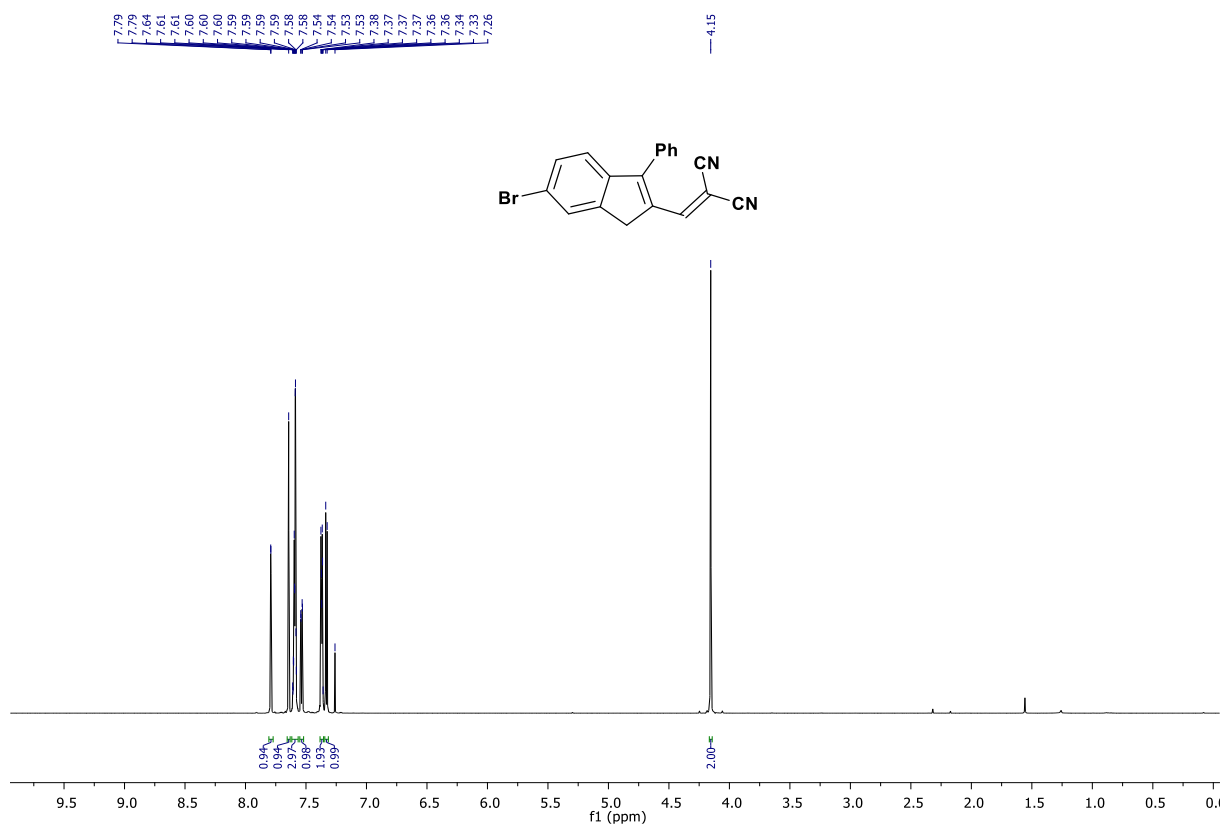

$^{13}\text{C}$  NMR (176 MHz,  $\text{CDCl}_3$ )

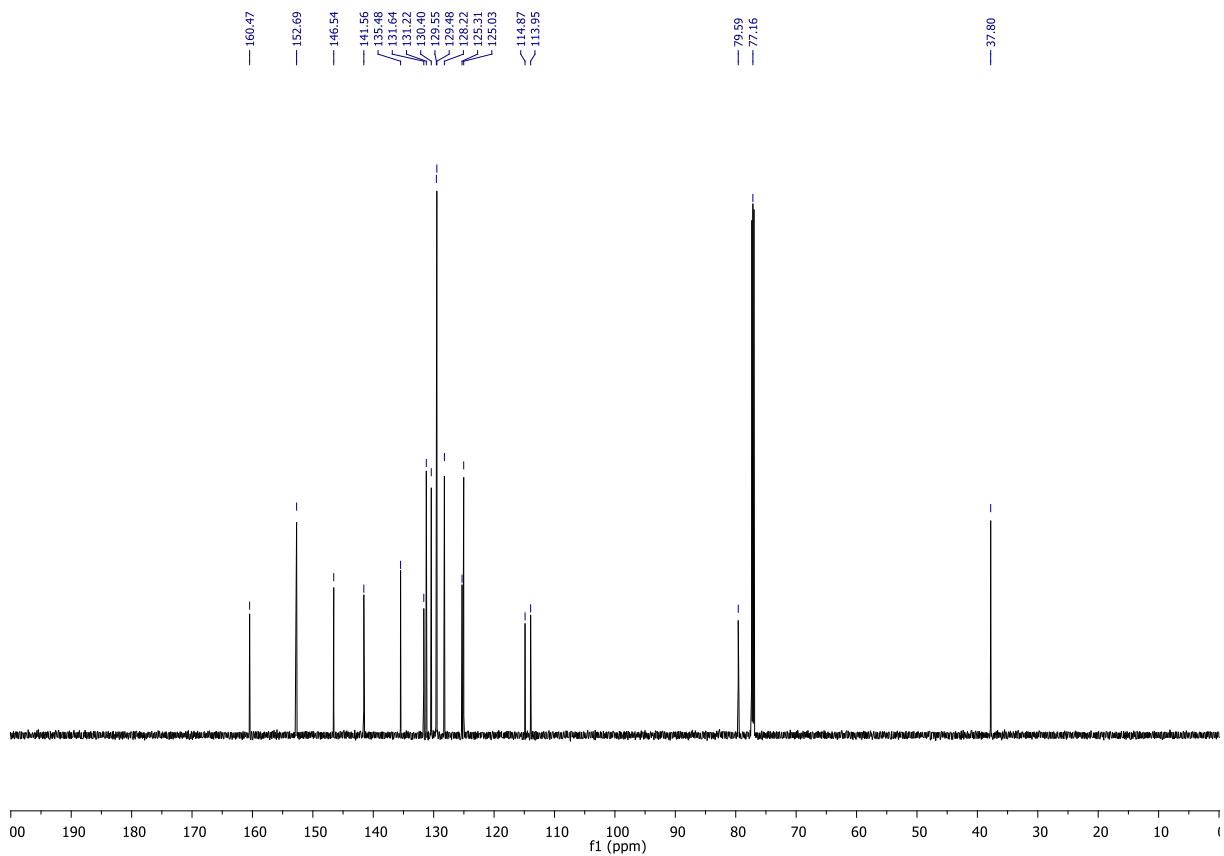

## 2-((7-bromo-3-phenyl-1H-inden-2-yl)methylene)malononitrile 1f

$^1\text{H}$  NMR (700 MHz,  $\text{CDCl}_3$ )

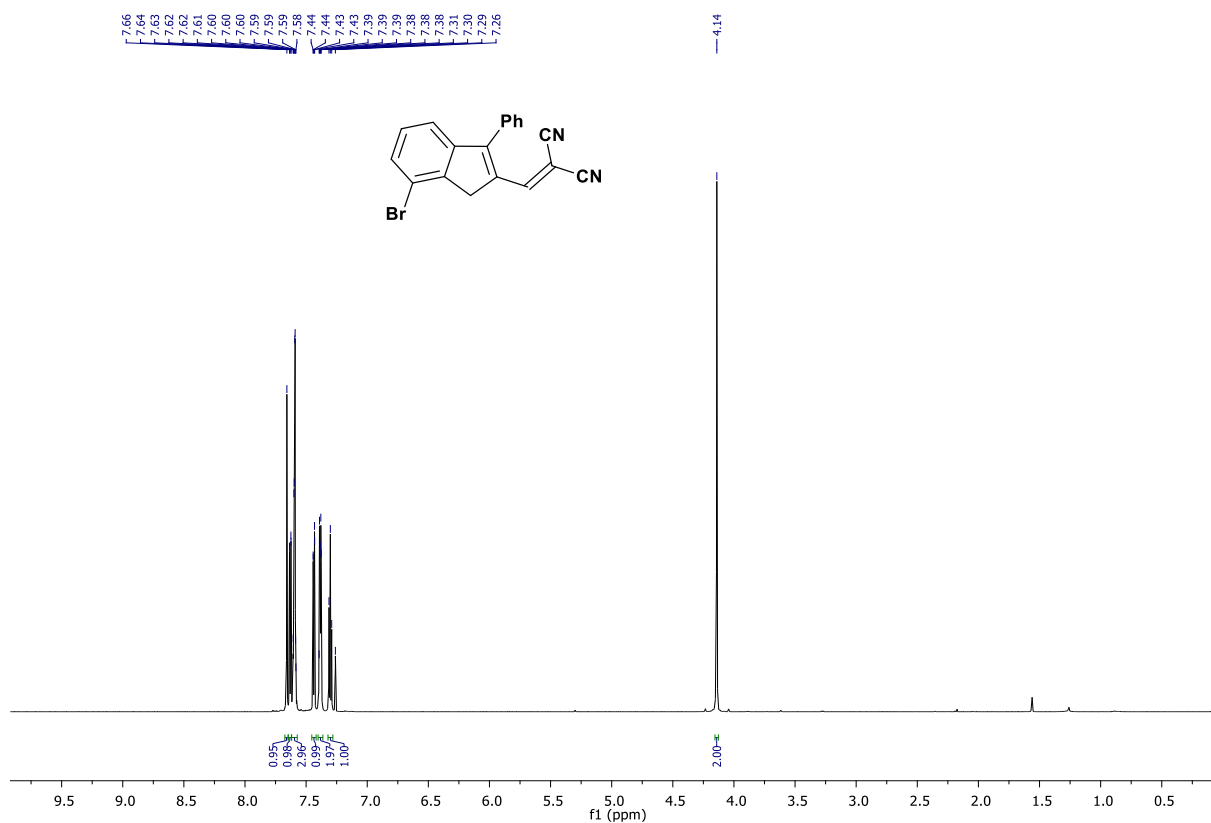

$^{13}\text{C}$  NMR (176 MHz,  $\text{CDCl}_3$ )

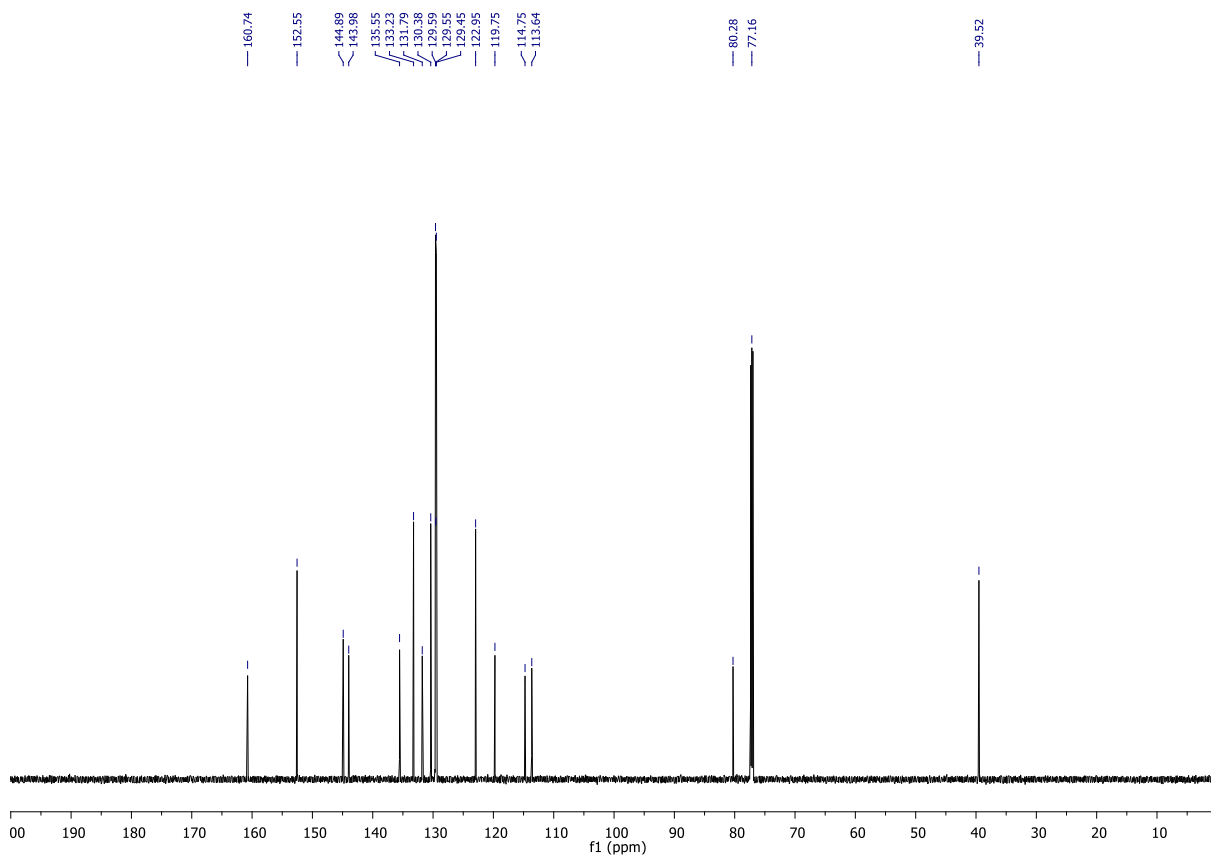

# 2-((3-(4-methoxyphenyl)-1H-inden-2-yl)methylene)malononitrile 1g

## <sup>1</sup>H NMR (700 MHz, CDCl<sub>3</sub>)

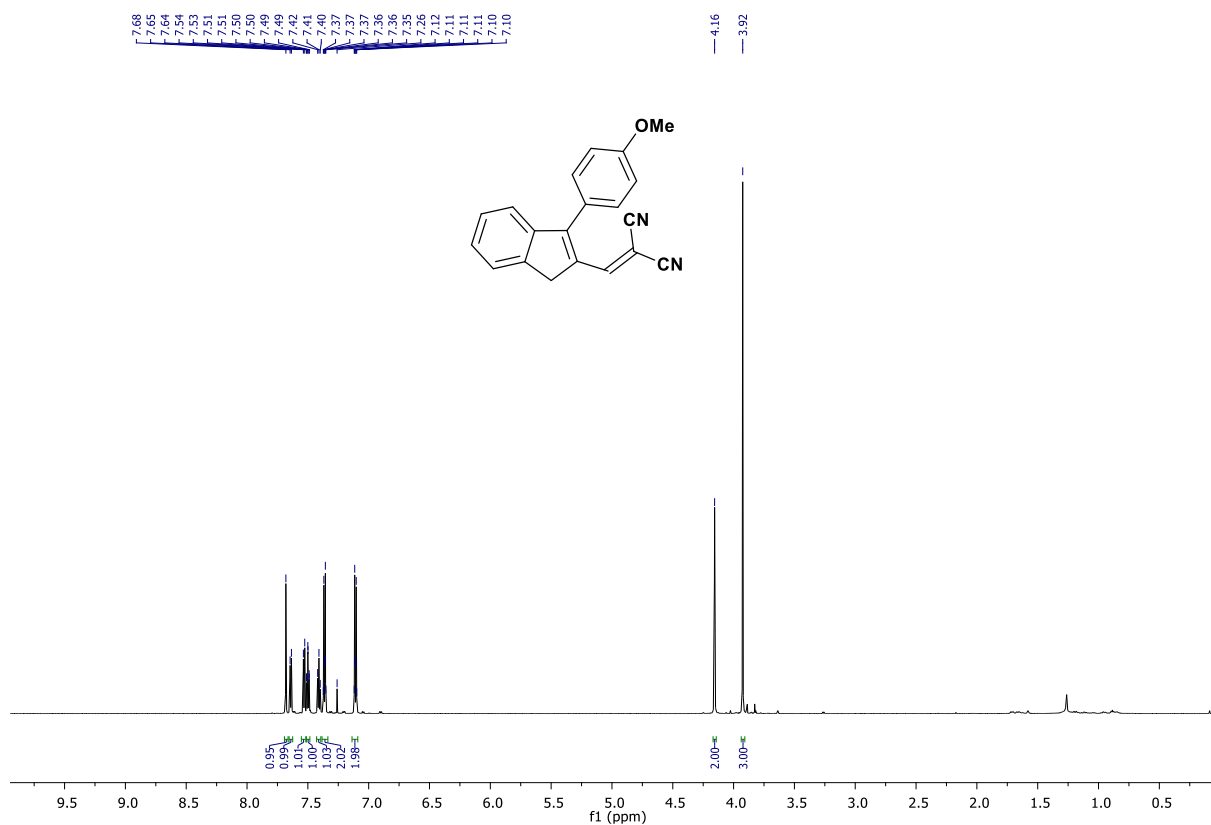

## <sup>13</sup>C NMR (176 MHz, CDCl<sub>3</sub>)

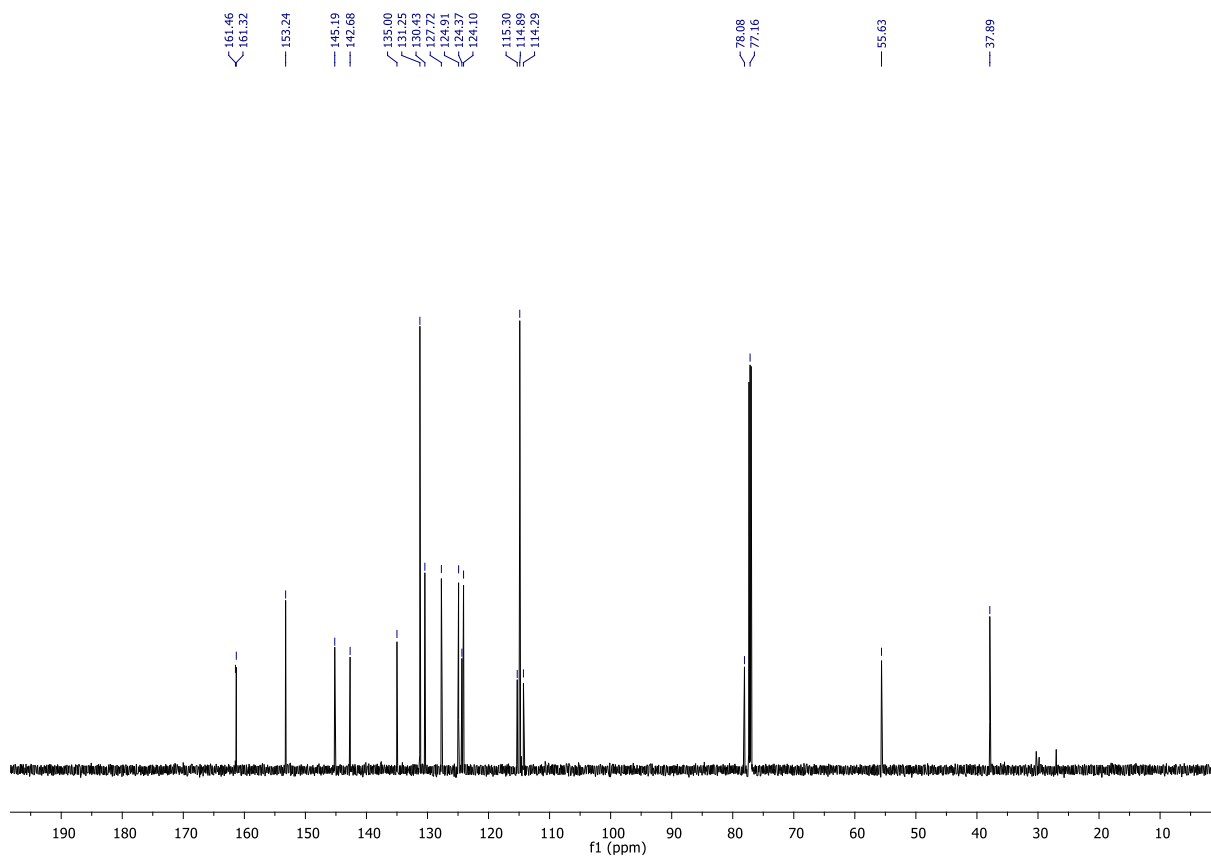

# 2-((3-(4-fluorophenyl)-1H-inden-2-yl)methylene)malononitrile 1h

<sup>1</sup>H NMR (700 MHz, CDCl<sub>3</sub>)

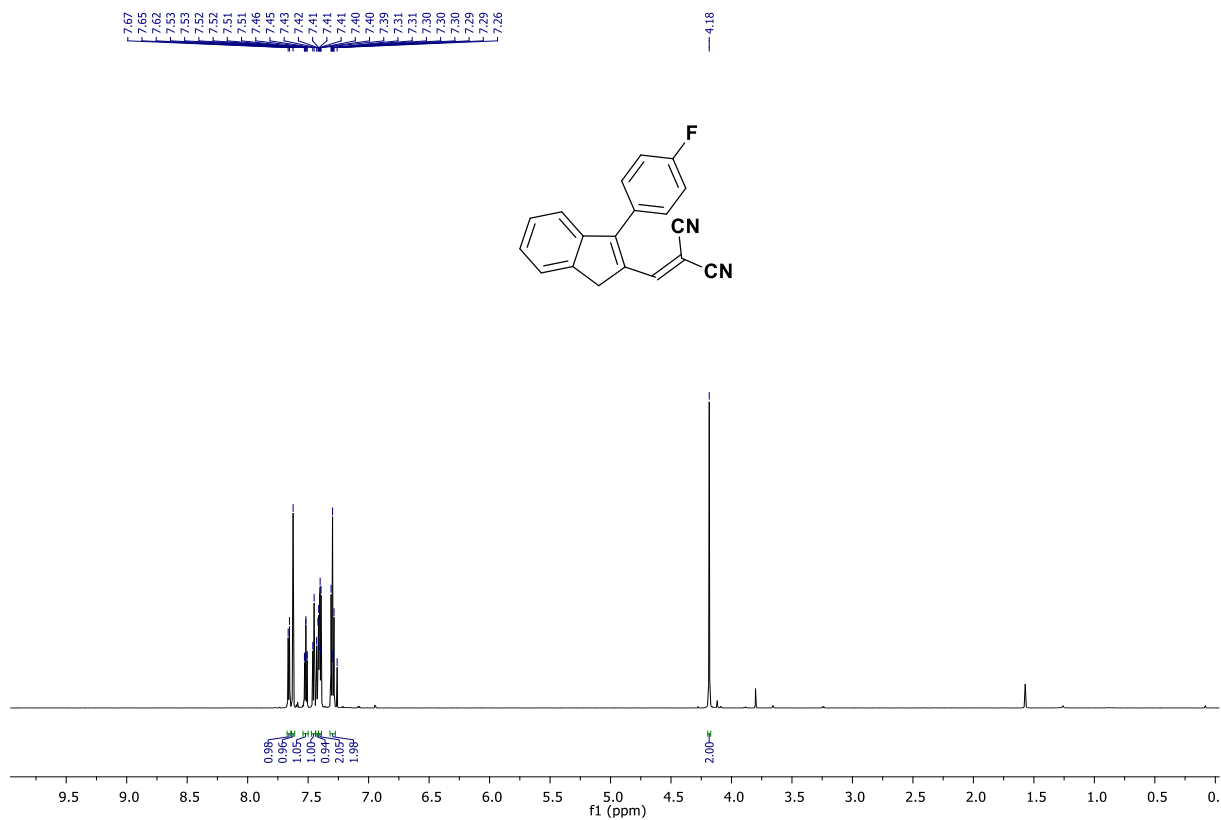

<sup>13</sup>C NMR (176 MHz, CDCl<sub>3</sub>)

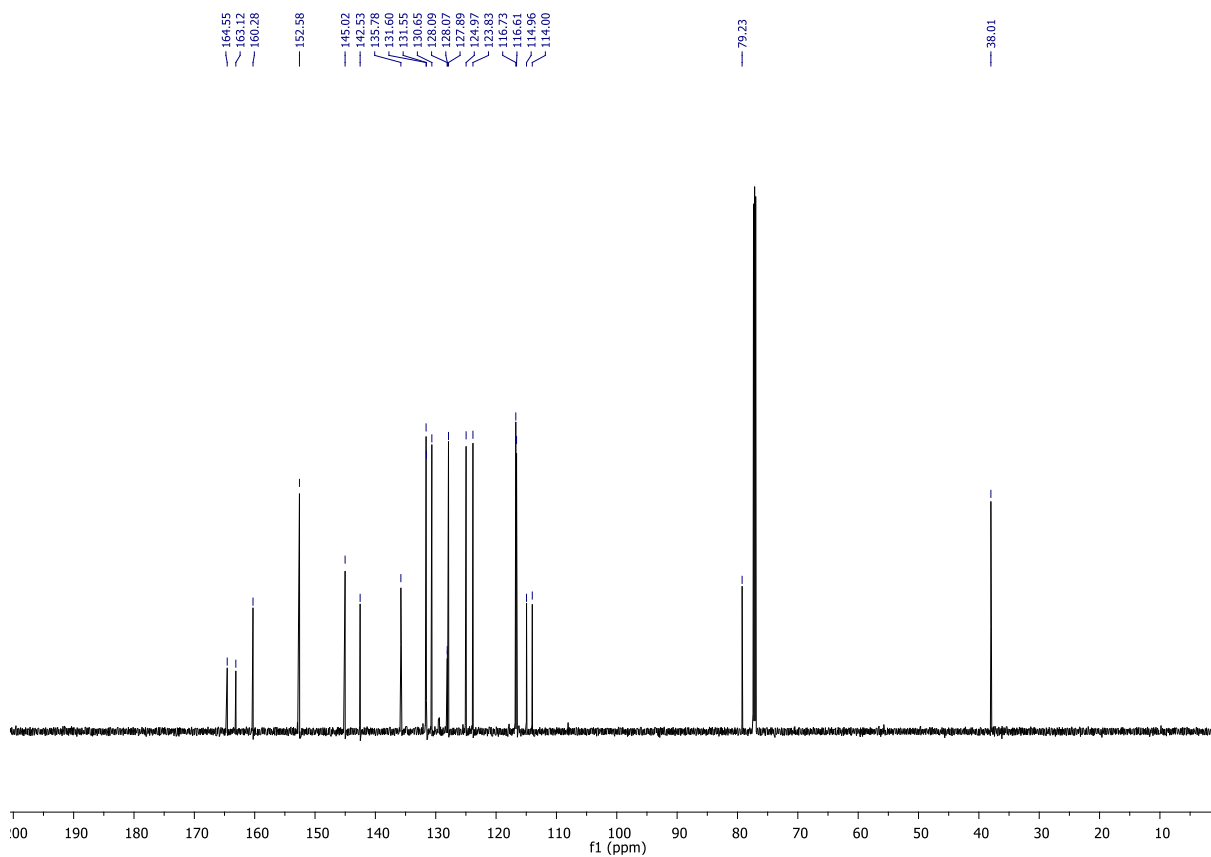

**$^{19}\text{F}$  NMR (376 MHz,  $\text{CDCl}_3$ )**

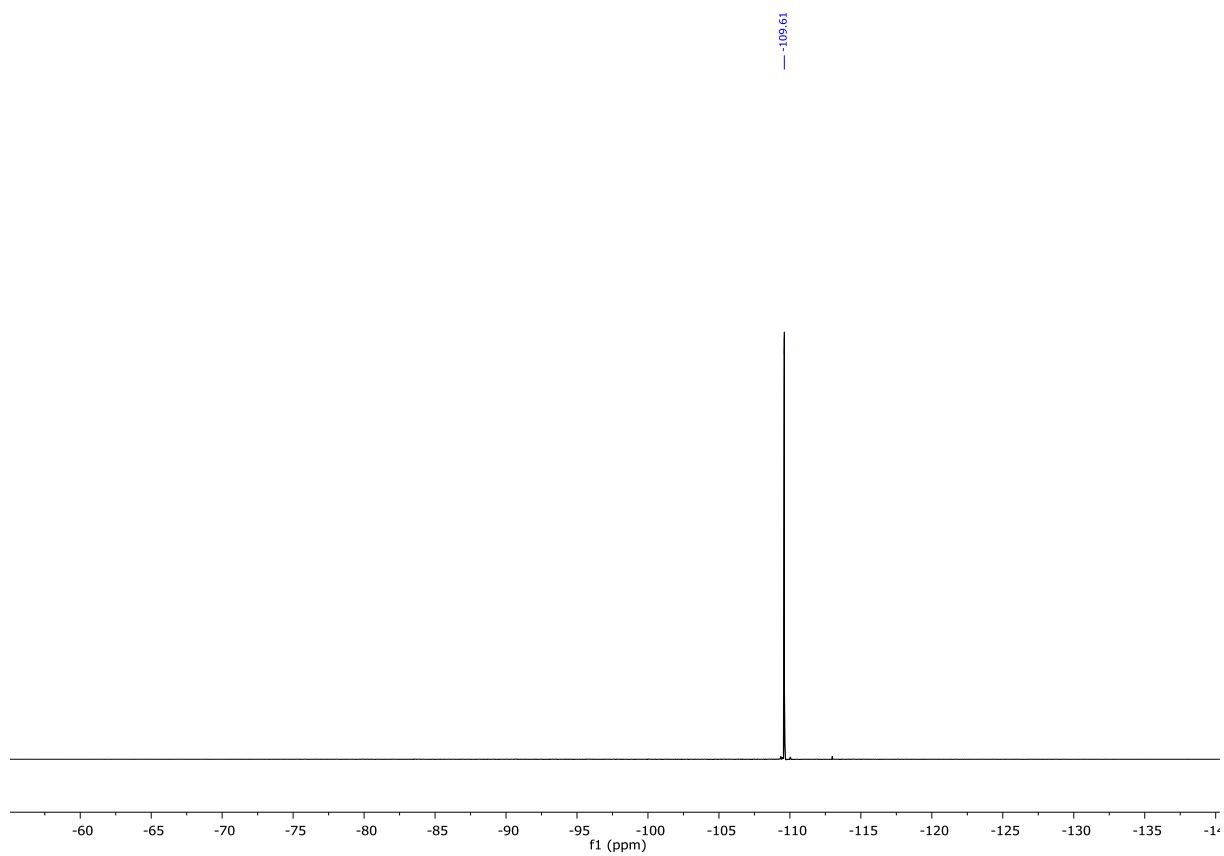

## 2-((3-([1,1'-biphenyl]-4-yl)-1H-inden-2-yl)methylene)malononitrile **1i**

### $^1\text{H}$ NMR (700 MHz, $\text{CDCl}_3$ )

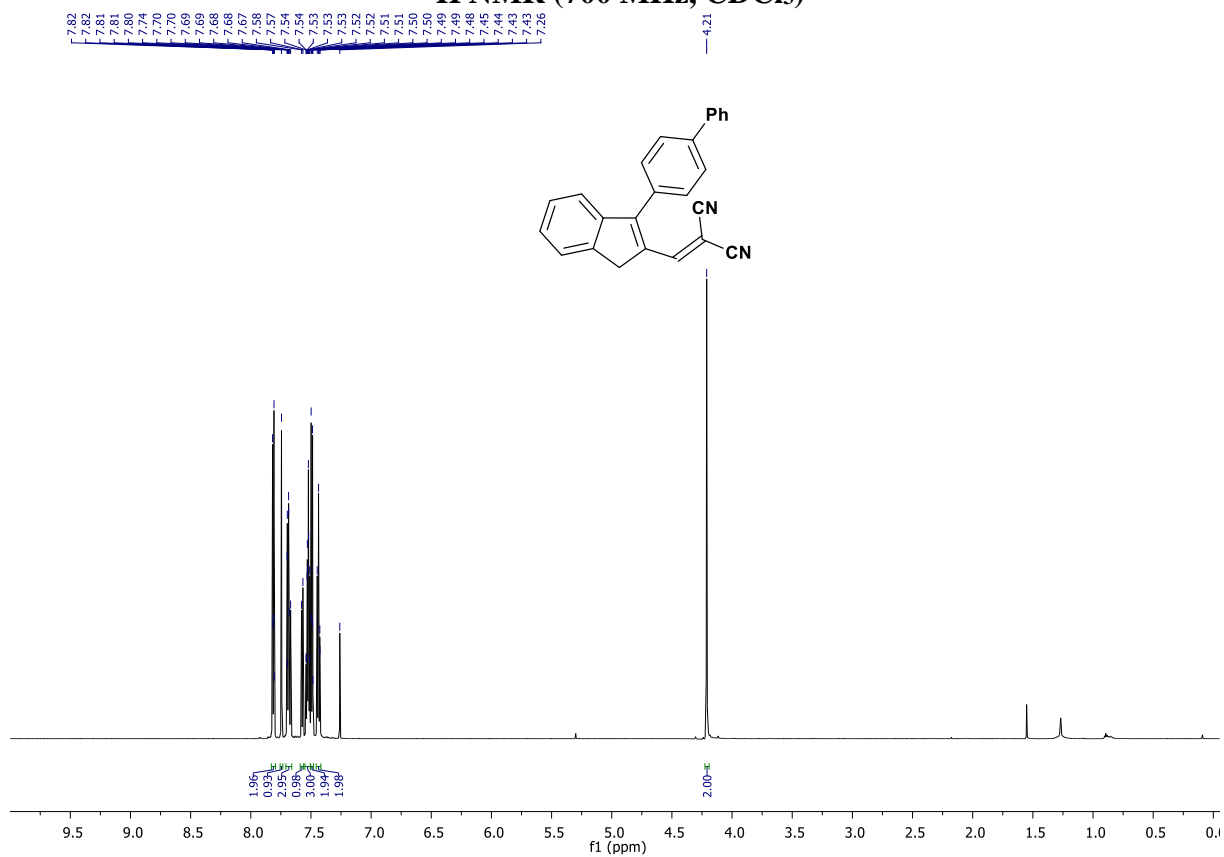

### $^{13}\text{C}$ NMR (176 MHz, $\text{CDCl}_3$ )

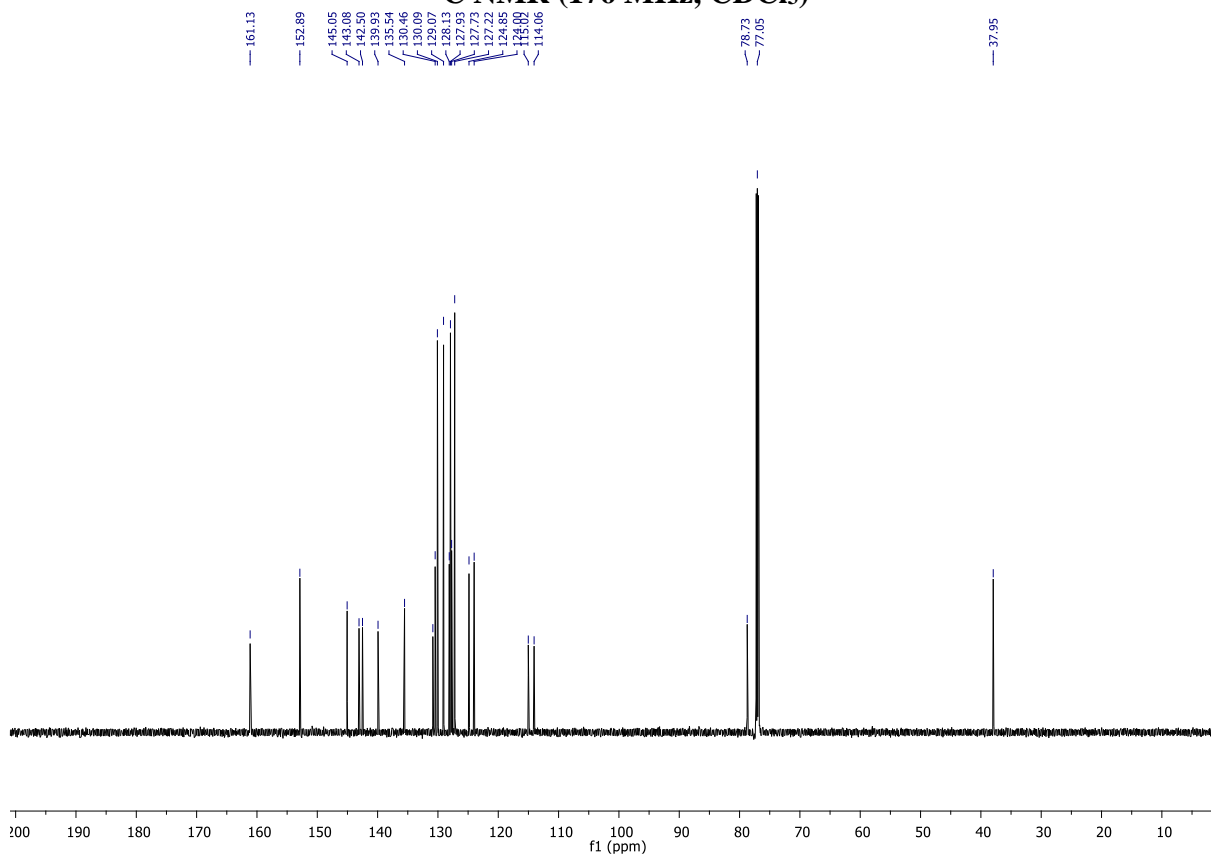



## 2-((3-(5-methylthiophen-2-yl)-1H-inden-2-yl)methylene)malononitrile 1j

<sup>1</sup>H NMR (700 MHz, CDCl<sub>3</sub>)

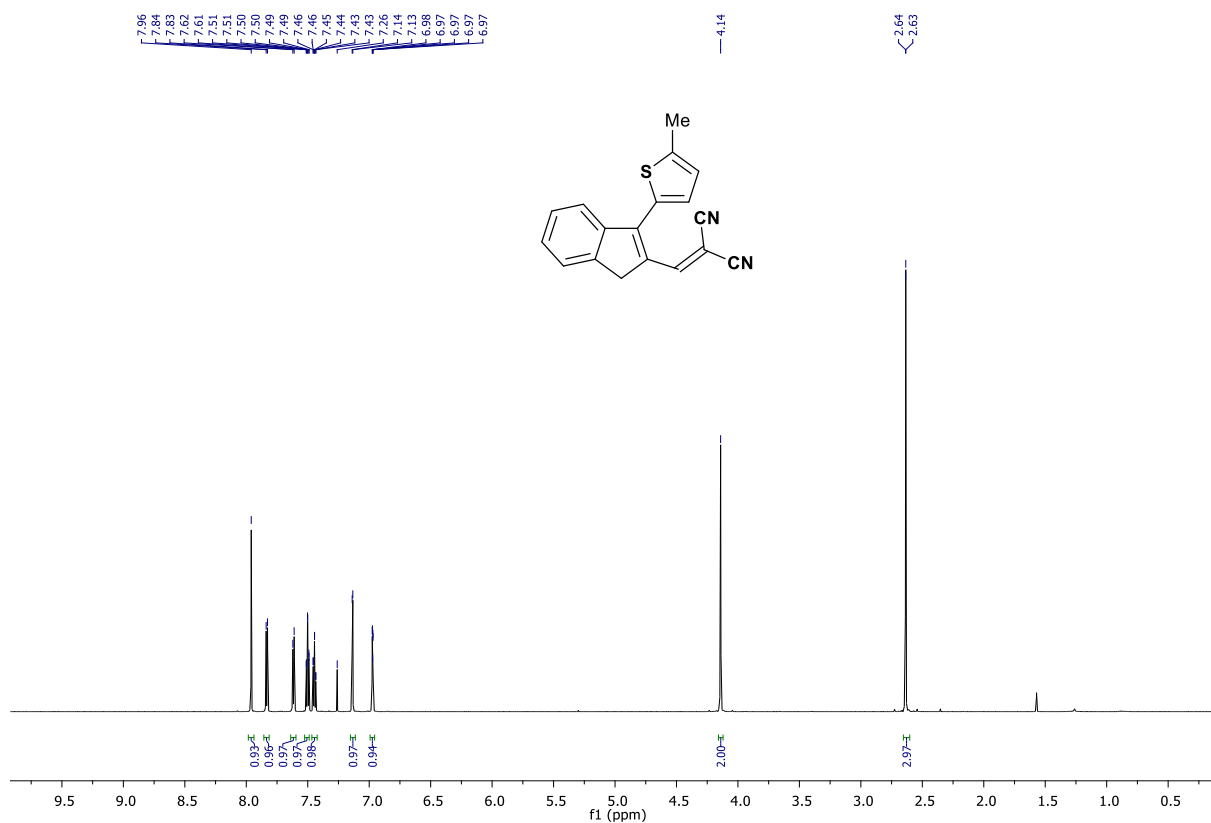

<sup>13</sup>C NMR (176 MHz, CDCl<sub>3</sub>)

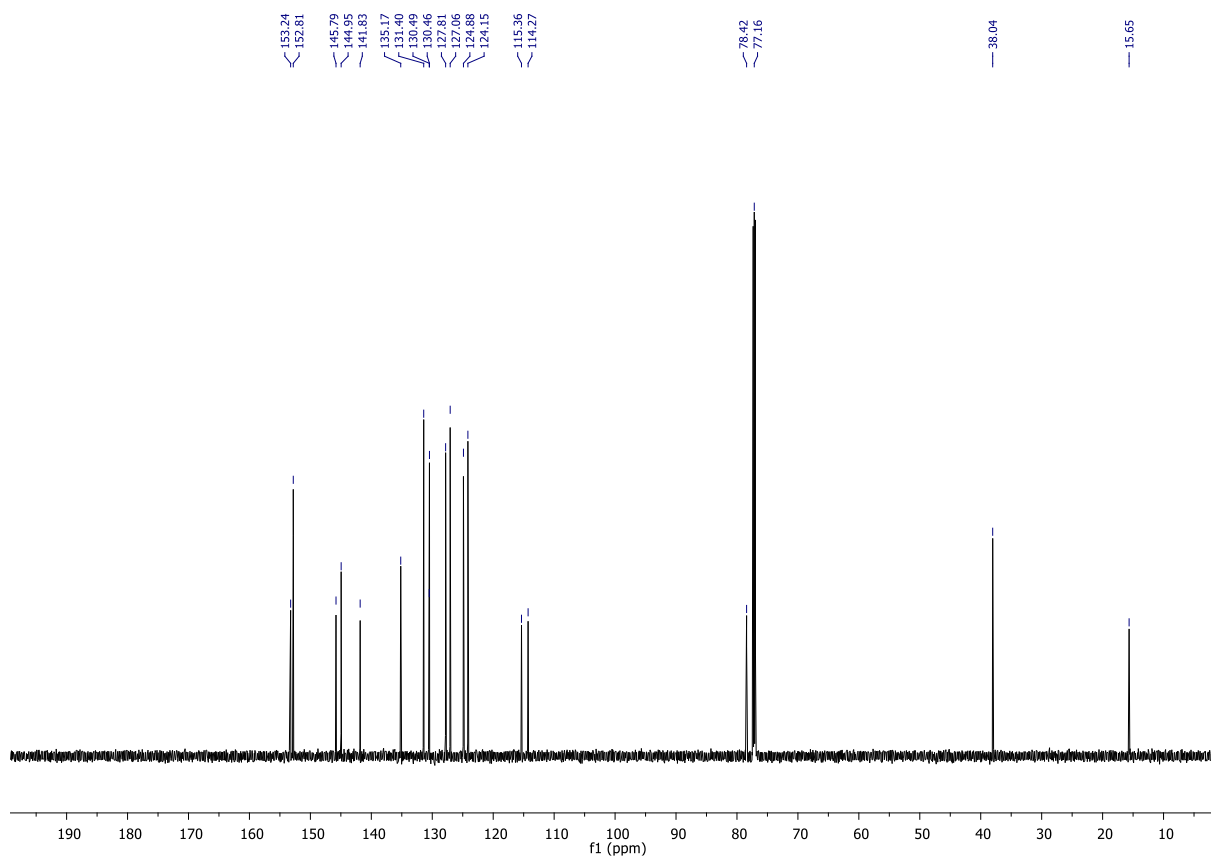

## 2-((1*H*-inden-2-yl)methylene)malononitrile **1k**

<sup>1</sup>H NMR (700 MHz, CDCl<sub>3</sub>)

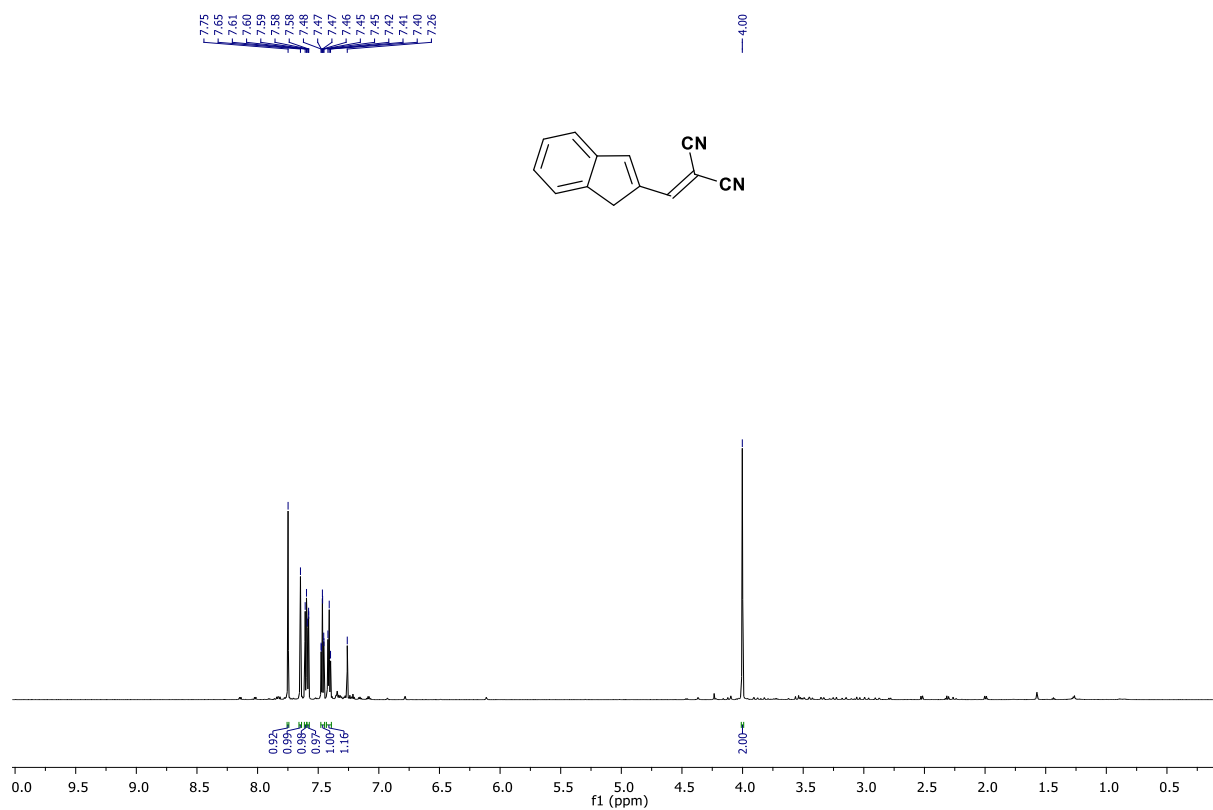

<sup>13</sup>C NMR (176 MHz, CDCl<sub>3</sub>)

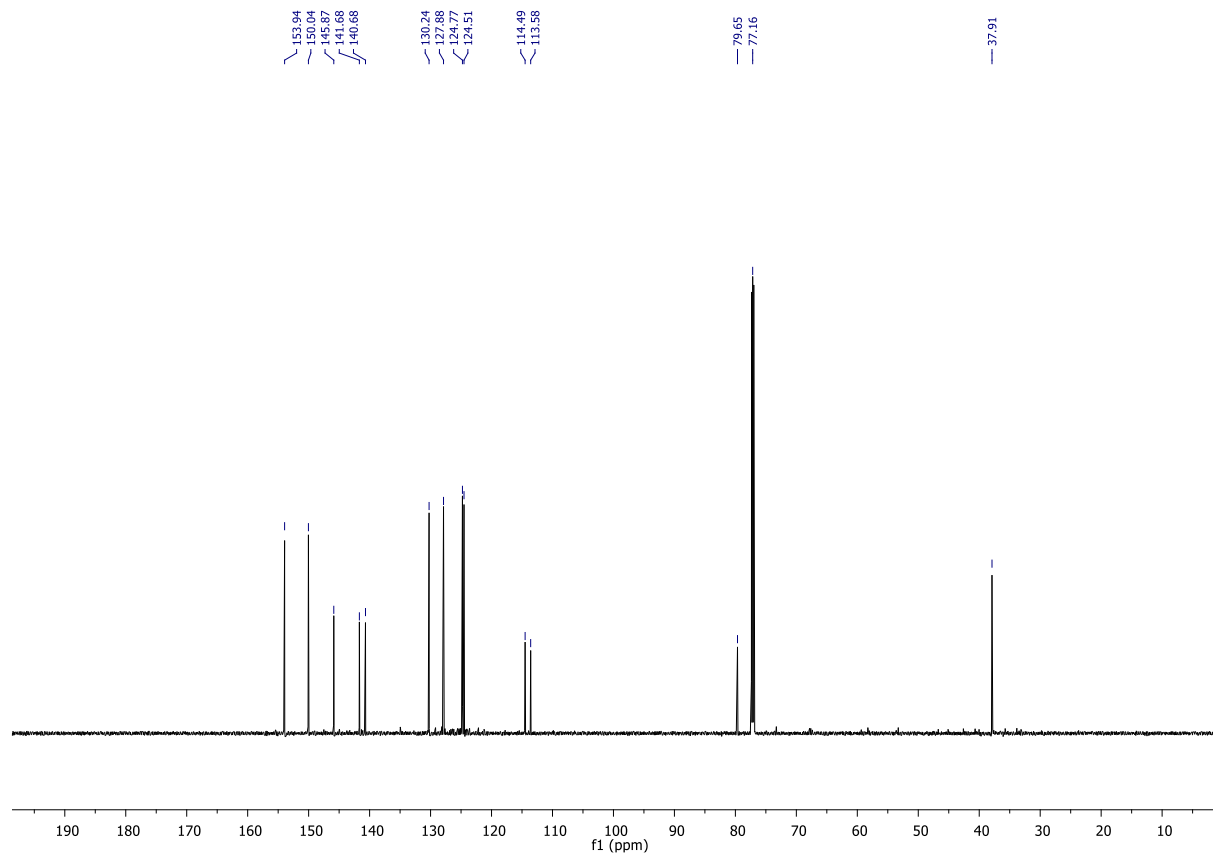

**(3*S*,4*aS*,9*bR*,10*R*,10*aR*)-2-formyl-3,5,10-triphenyl-4*a*,9*b*,10,10*a*-tetrahydroindeno[2,1-*a*]indene-4,4(3*H*)-dicarbonitrile 3a**

**<sup>1</sup>H NMR (700 MHz, CDCl<sub>3</sub>)**

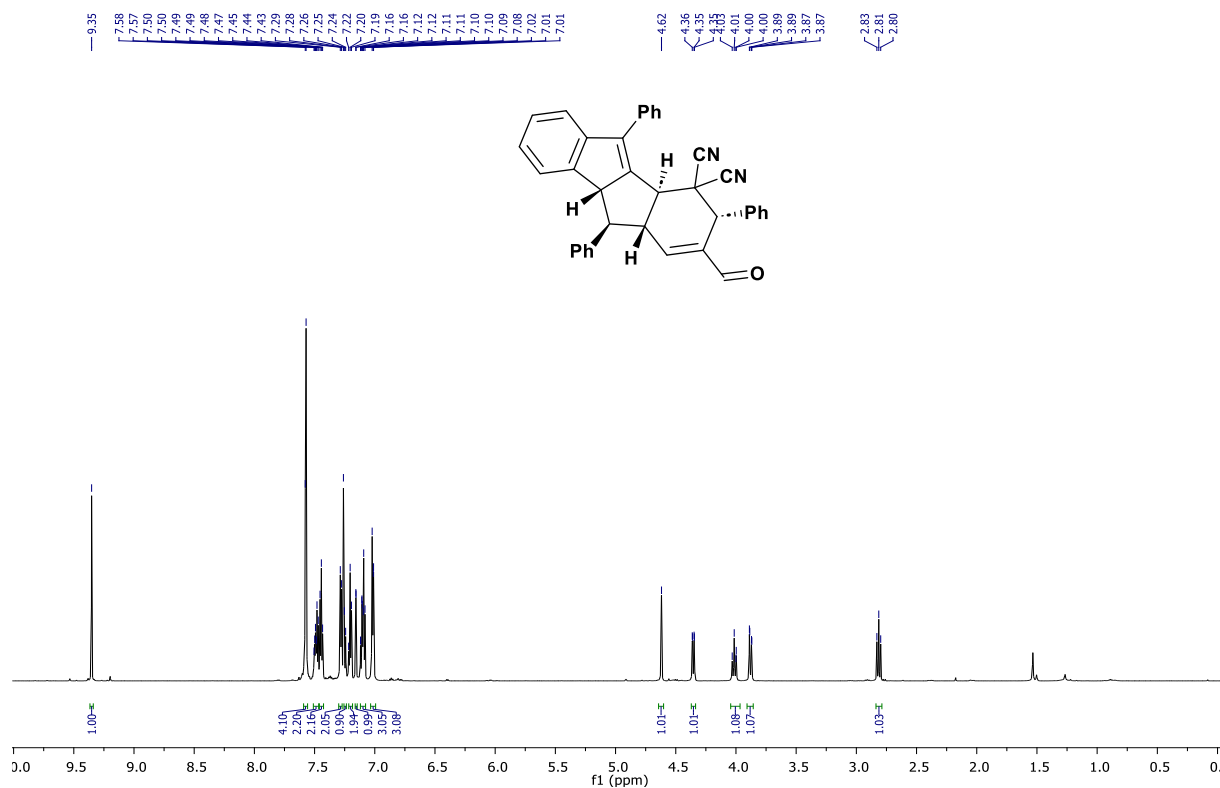

**<sup>13</sup>C NMR (176 MHz, CDCl<sub>3</sub>)**

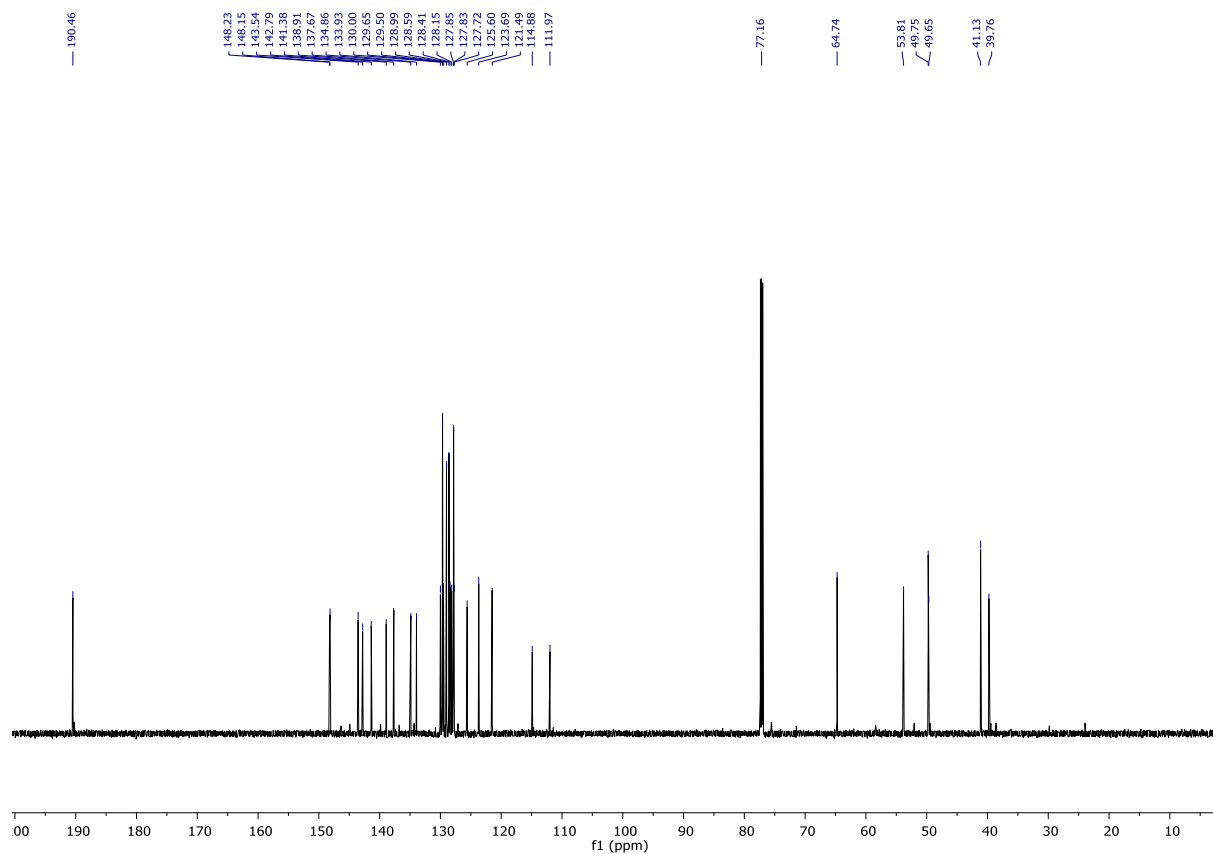

**(3*S*,4*aS*,9*bR*,10*R*,10*aR*)-2-formyl-3,10-bis(4-methoxyphenyl)-5-phenyl-4*a*,9*b*,10,10*a*-tetrahydroindeno[2,1-*a*]indene-4,4(3*H*)-dicarbonitrile 3b**

**<sup>1</sup>H NMR (700 MHz, CDCl<sub>3</sub>)**

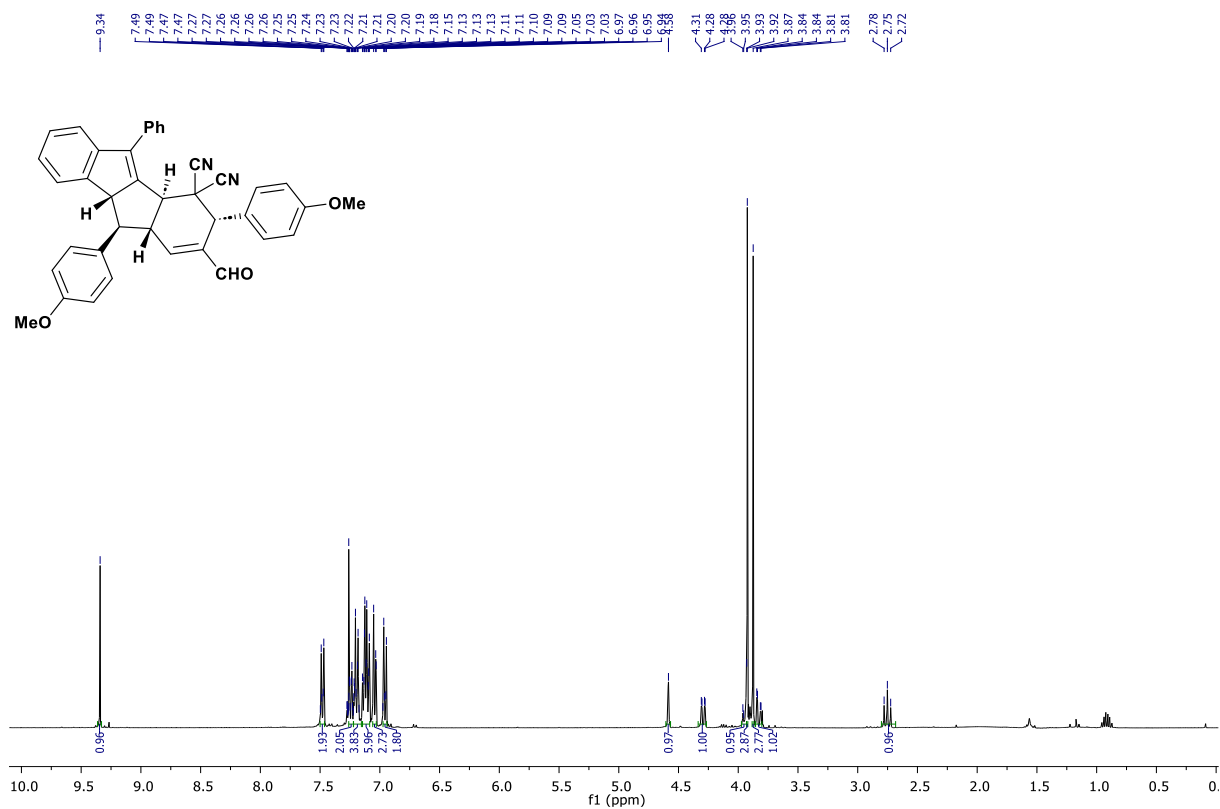

**<sup>13</sup>C NMR (176 MHz, CDCl<sub>3</sub>)**

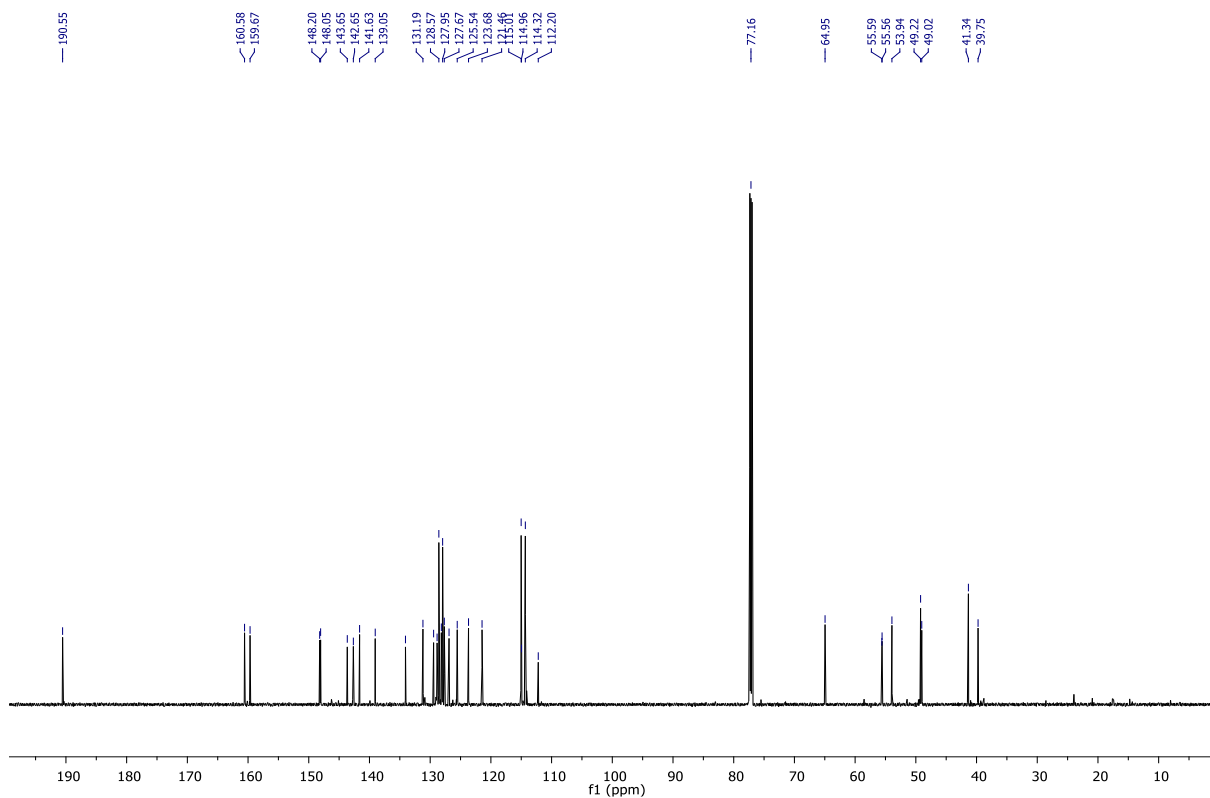

**(3*S*,4*aS*,9*bR*,10*R*,10*aR*)-2-formyl-3,10-bis(3-methoxyphenyl)-5-phenyl-4*a*,9*b*,10,10*a*-tetrahydroindeno[2,1-*a*]indene-4,4(3*H*)-dicarbonitrile 3c**

**<sup>1</sup>H NMR (700 MHz, CDCl<sub>3</sub>)**

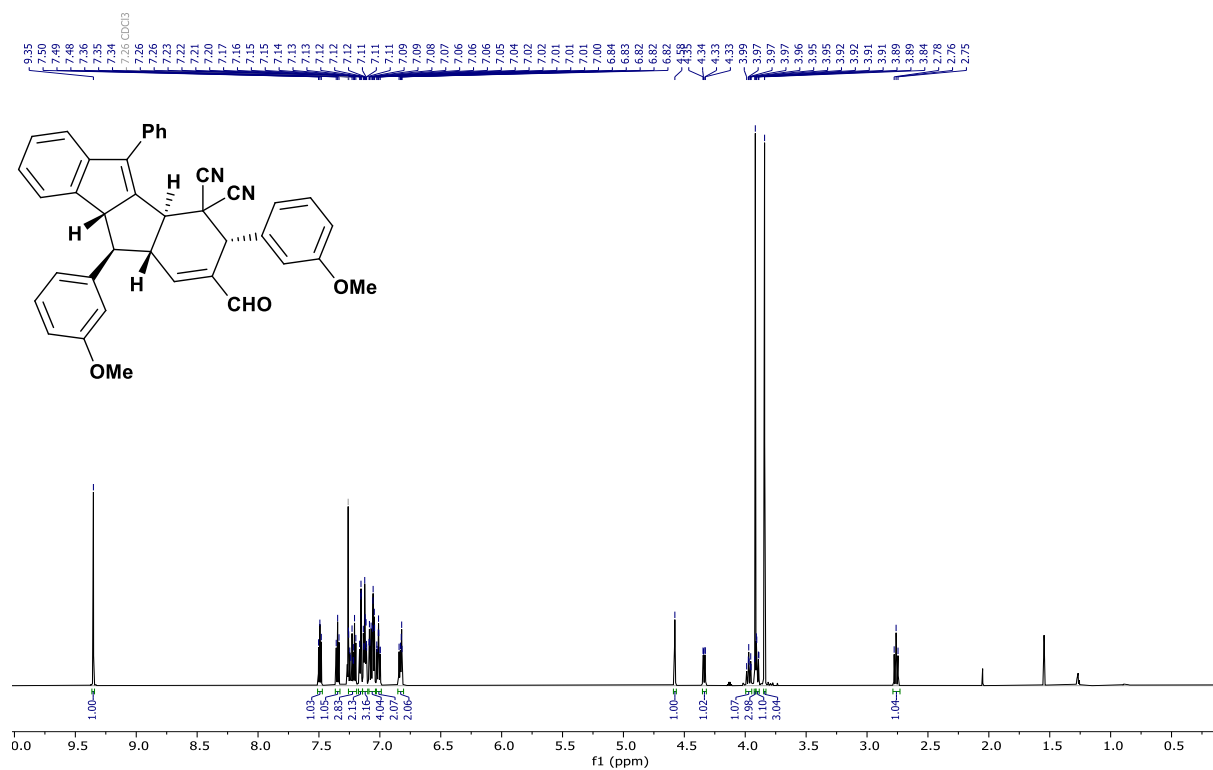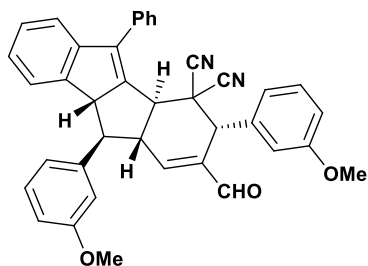

**<sup>13</sup>C NMR (176 MHz, CDCl<sub>3</sub>)**

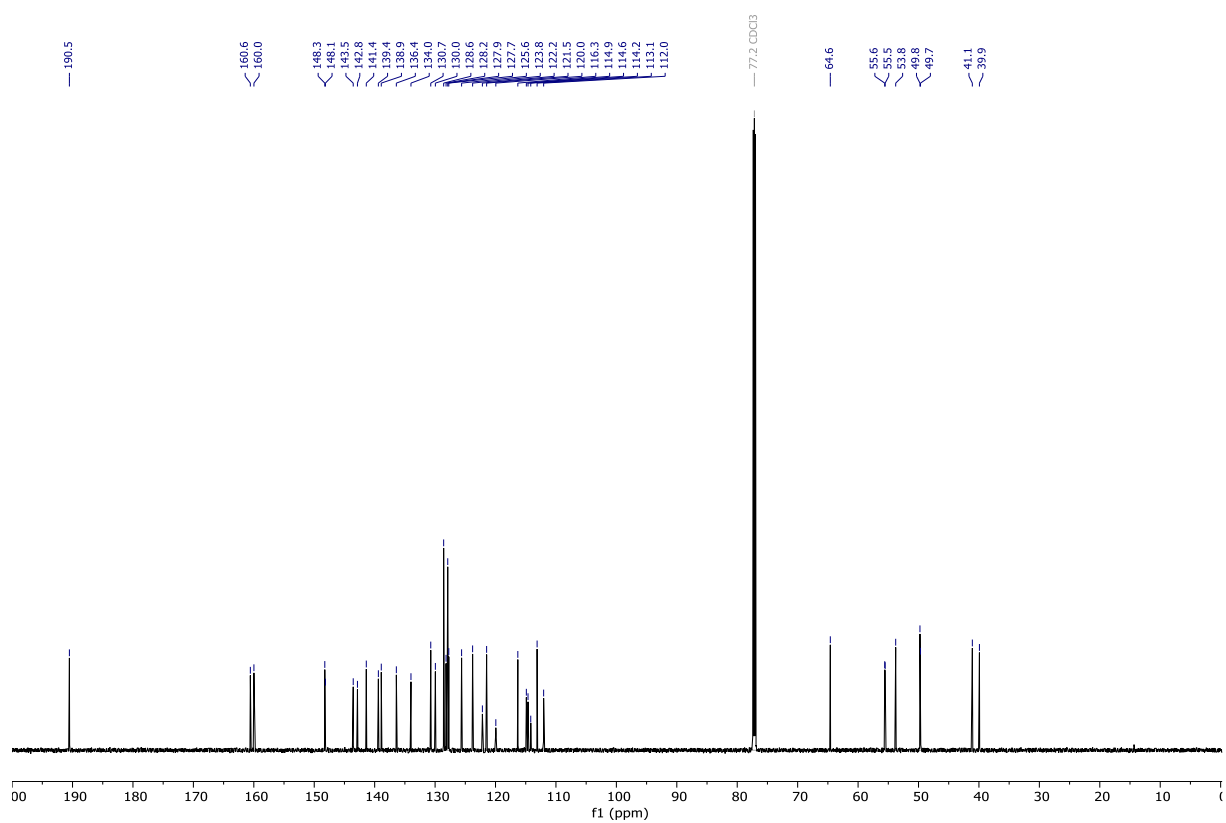

**(3*S*,4*aS*,9*bR*,10*R*,10*aR*)-2-formyl-5-phenyl-3,10-di-*p*-tolyl-4*a*,9*b*,10,10*a*-tetrahydroindeno  
[2,1-*a*]indene-4,4(3*H*)-dicarbonitrile 3d**

**$^1\text{H NMR}$  (700 MHz,  $\text{CDCl}_3$ )**

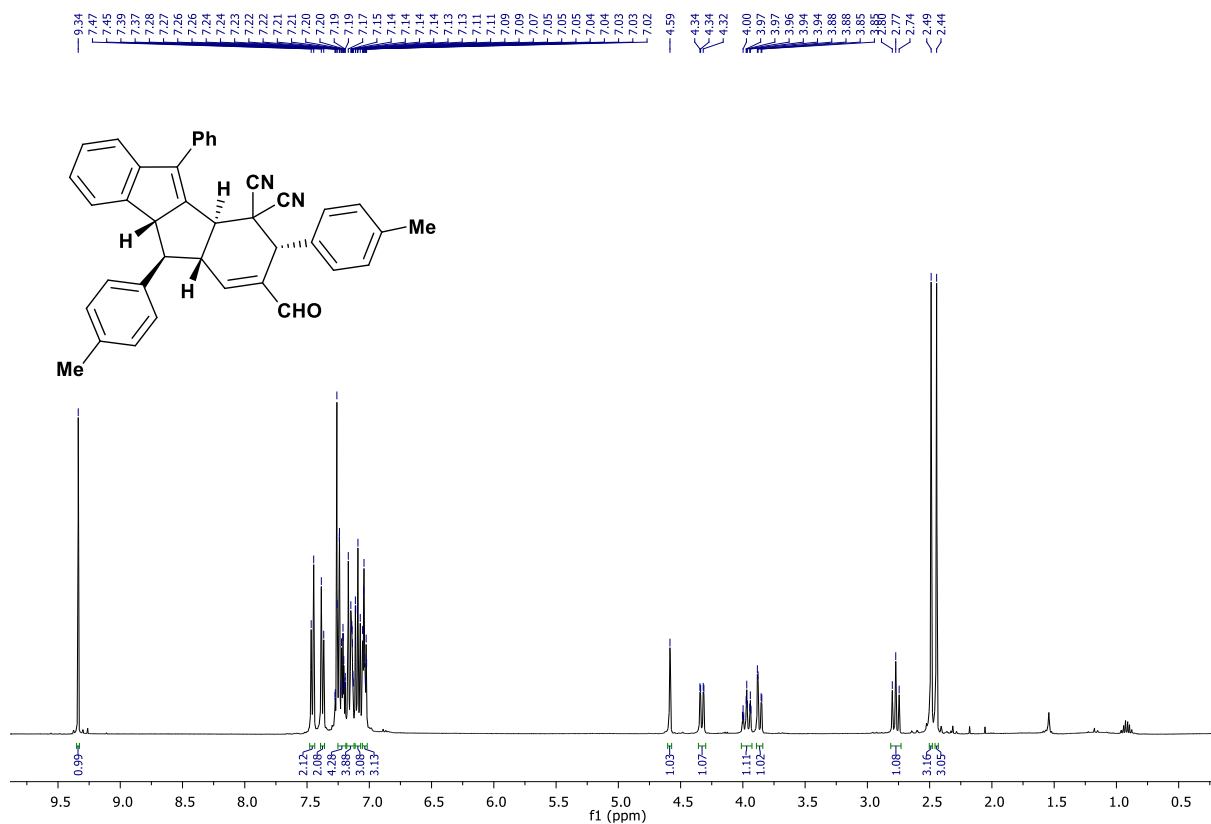

**$^{13}\text{C NMR}$  (176 MHz,  $\text{CDCl}_3$ )**

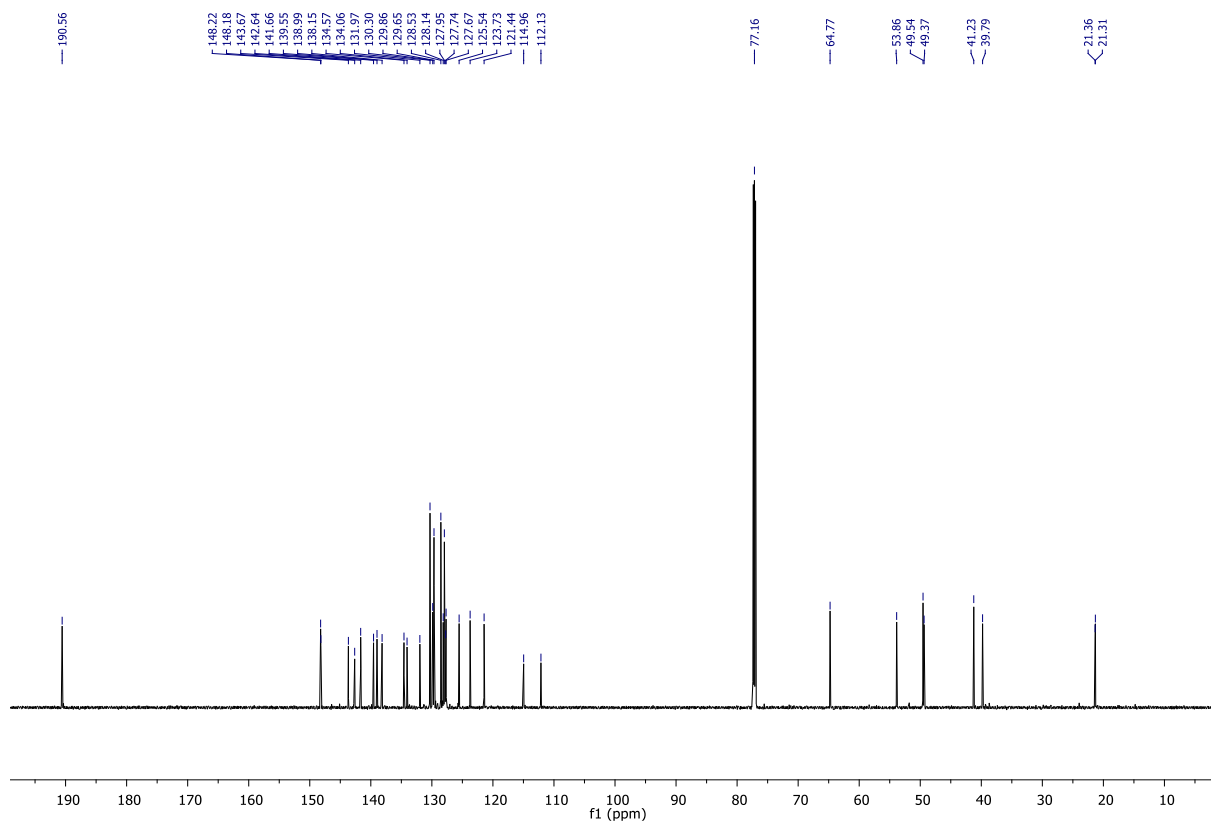

**(3*S*,4*aS*,9*bR*,10*R*,10*aR*)-3,10-bis(4-chlorophenyl)-2-formyl-5-phenyl-4*a*,9*b*,10,10*a*-tetrahydroindeno[2,1-*a*]indene-4,4(3*H*)-dicarbonitrile 3e**

**<sup>1</sup>H NMR (700 MHz, CDCl<sub>3</sub>)**

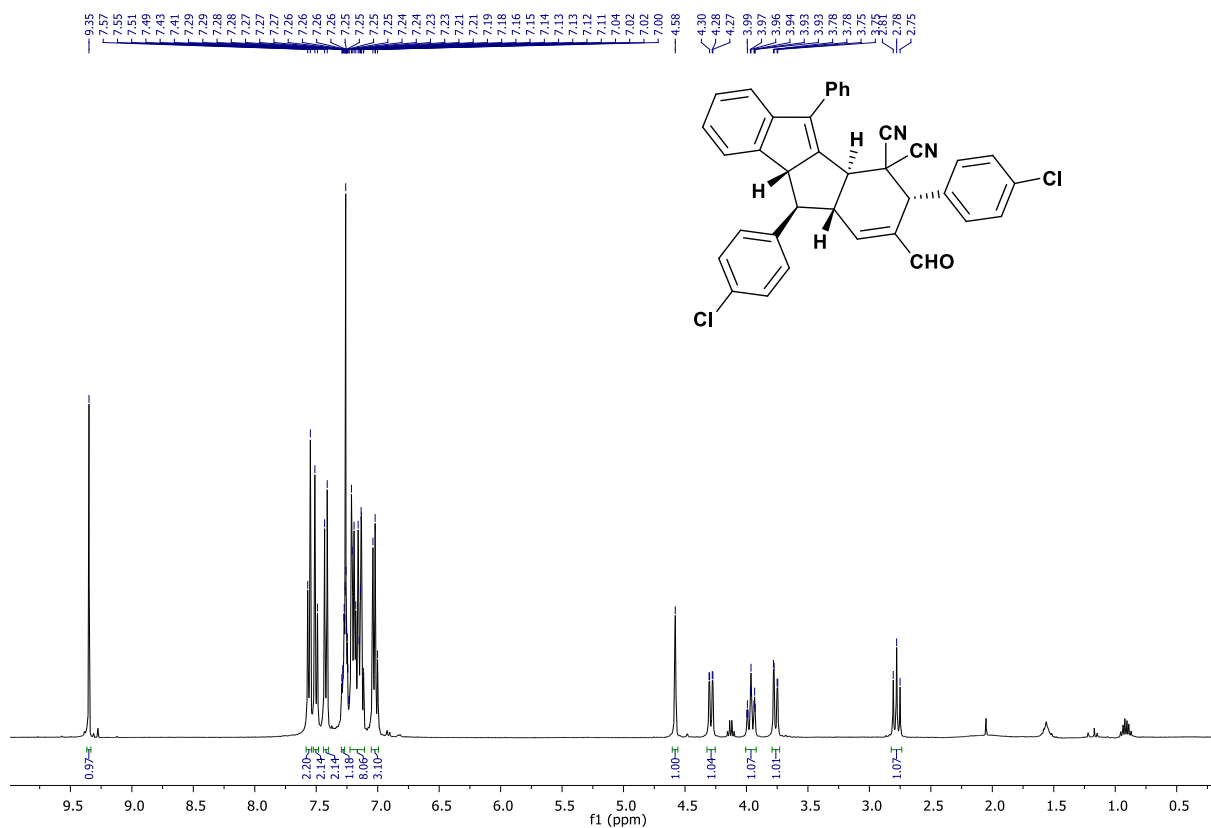

**<sup>13</sup>C NMR (176 MHz, CDCl<sub>3</sub>)**

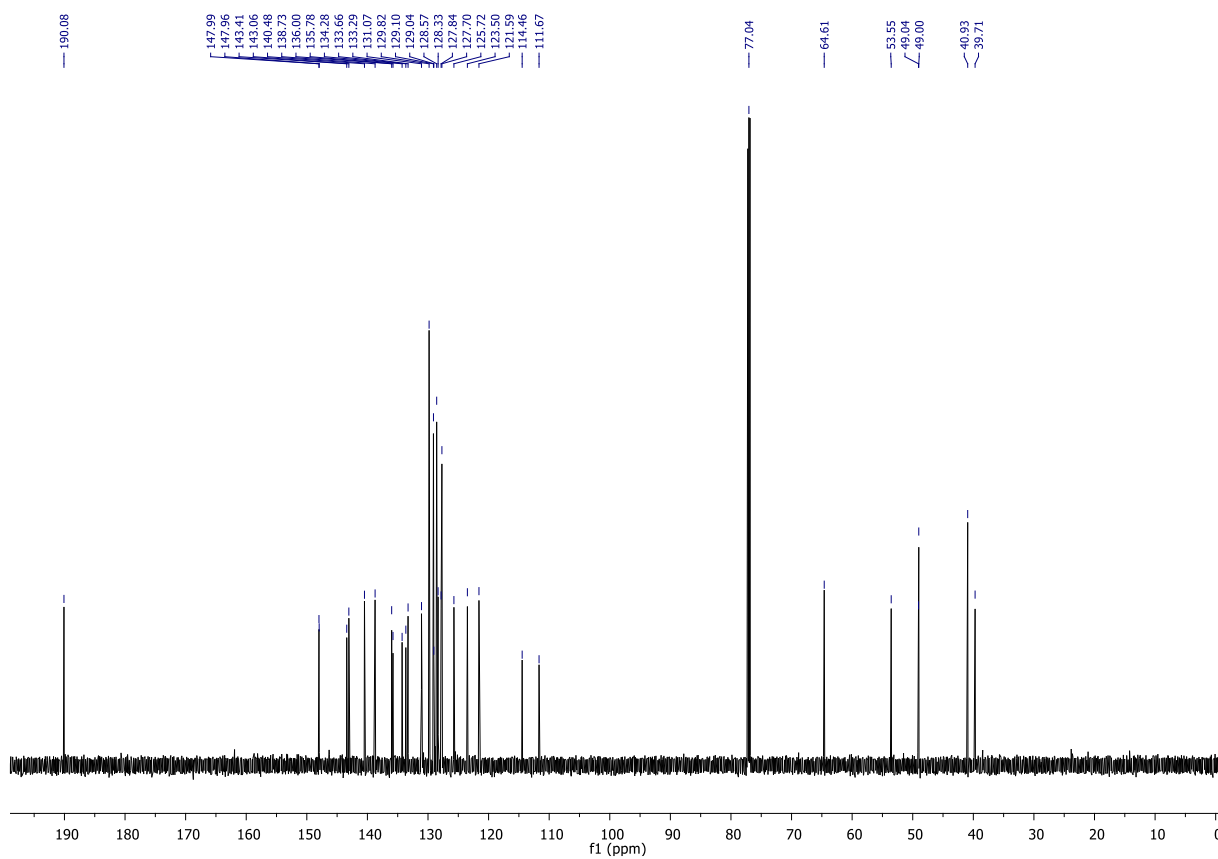

(3*S*,4*aS*,9*bR*,10*R*,10*aR*)-2-formyl-5-phenyl-3,10-bis(4-(trifluoromethyl)phenyl)-4*a*,9*b*,10,10*a*-tetrahydroindeno[2,1-*a*]indene-4,4(3*H*)-dicarbonitrile 3f

<sup>1</sup>H NMR (700 MHz, CDCl<sub>3</sub>)

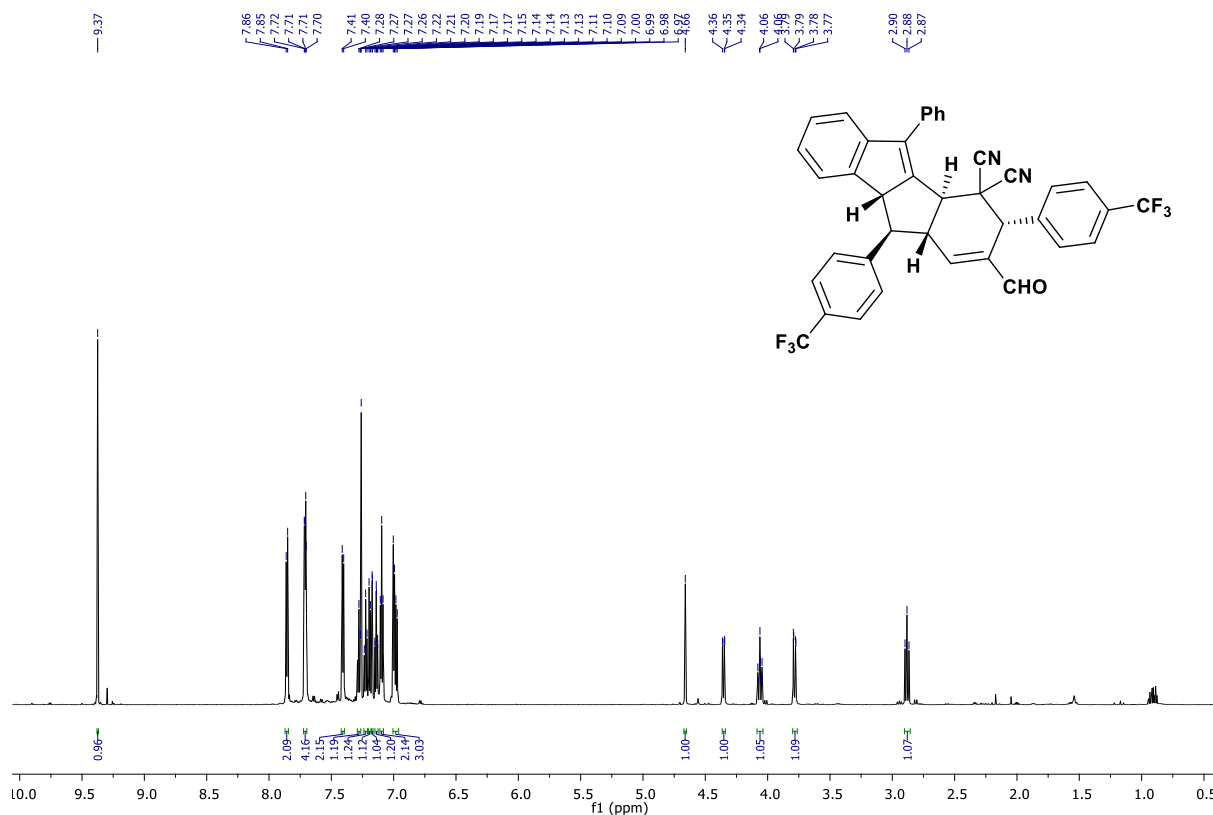

<sup>13</sup>C NMR (176 MHz, CDCl<sub>3</sub>)

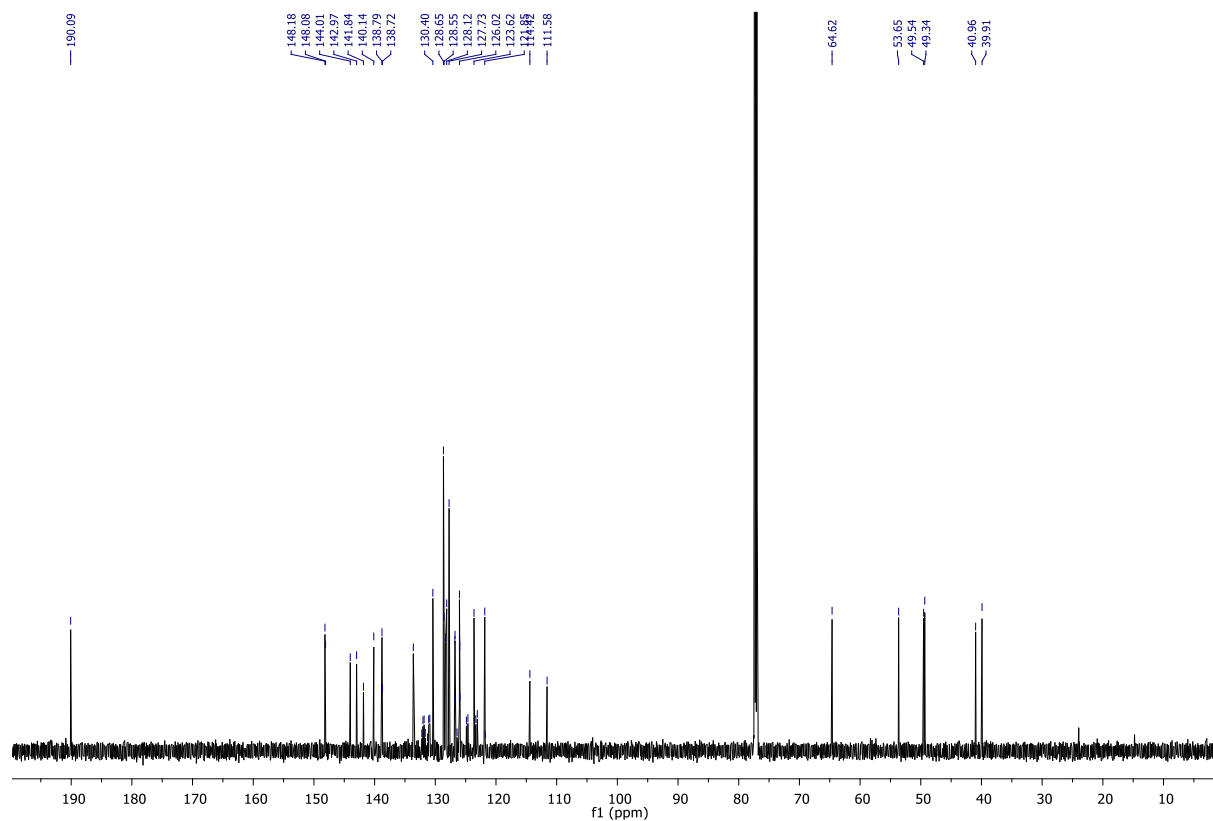



**$^{19}\text{F}$  NMR (376 MHz,  $\text{CDCl}_3$ )**

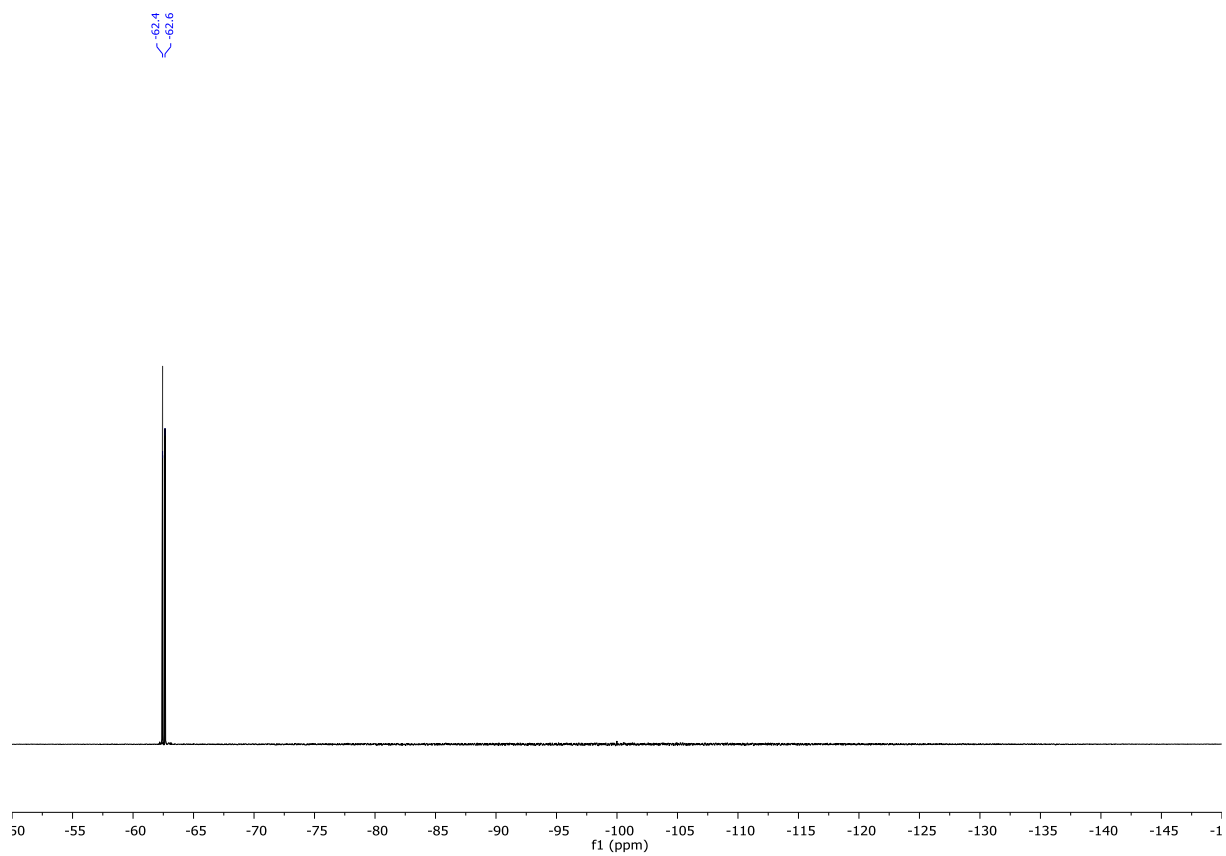

(3*S*,4*aS*,9*bR*,10*R*,10*aR*)-2-formyl-3,10-di(naphthalen-2-yl)-5-phenyl-4*a*,9*b*,10,10*a*-tetrahydroindeno[2,1-*a*]indene-4,4(3*H*)-dicarbonitrile 3g

<sup>1</sup>H NMR (700 MHz, CDCl<sub>3</sub>)

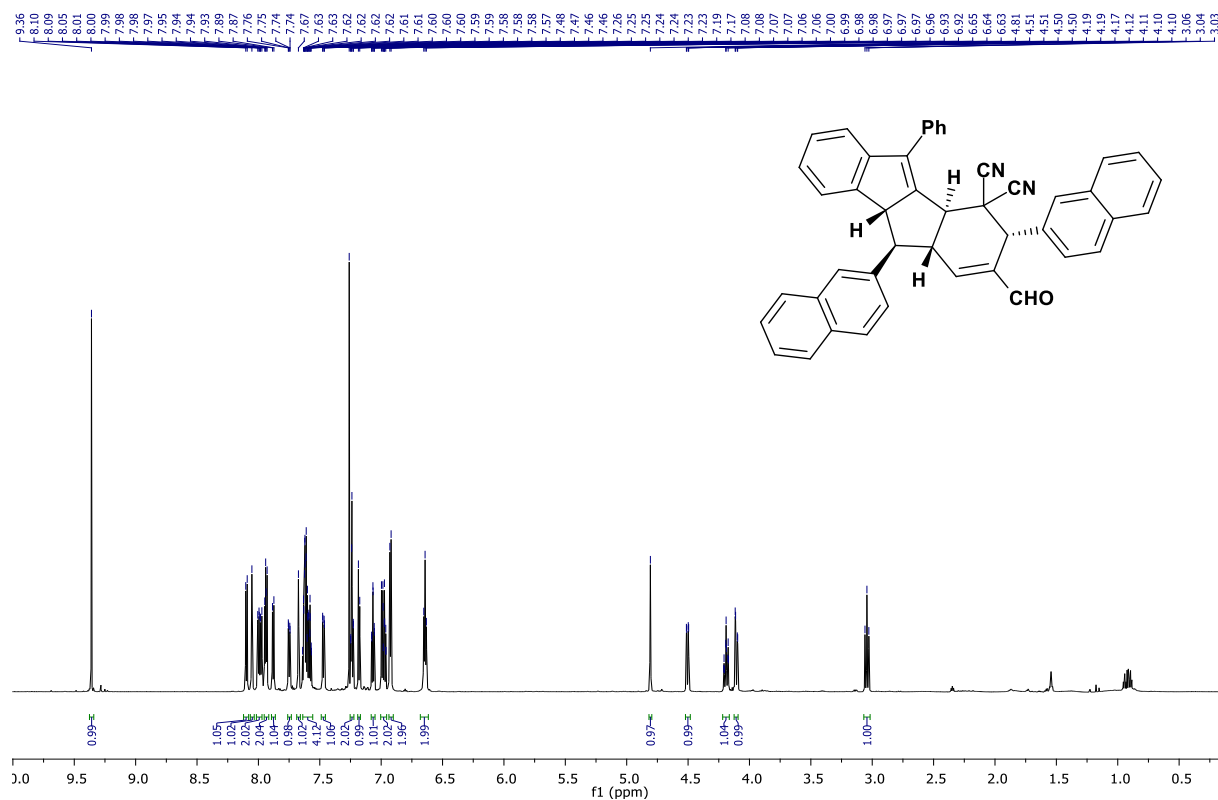

<sup>13</sup>C NMR (176 MHz, CDCl<sub>3</sub>)

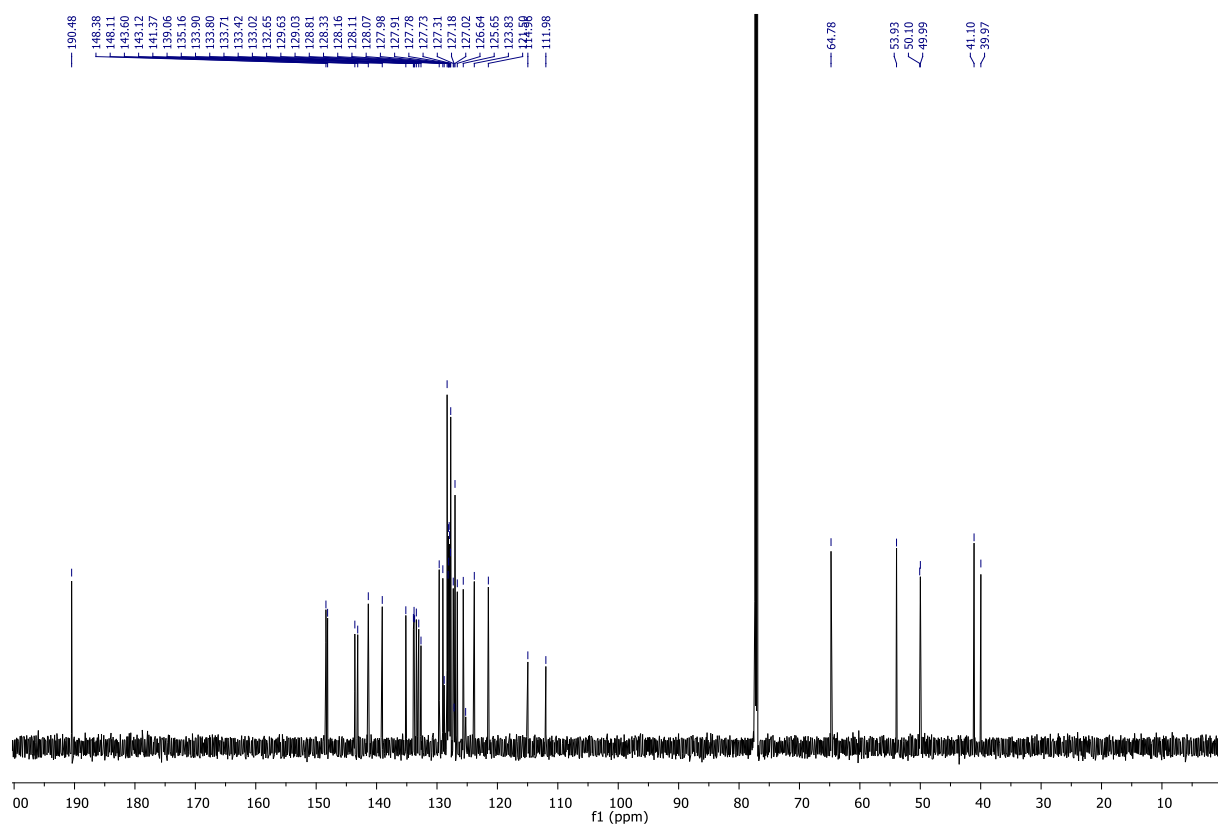

**(3S,4aS,9bR,10R,10aS)-2-formyl-3,10-di(furan-2-yl)-5-phenyl-4a,9b,10,10a-tetrahydroindeno[2,1-a]indene-4,4(3H)-dicarbonitrile 3h**

**<sup>1</sup>H NMR (700 MHz, CDCl<sub>3</sub>)**

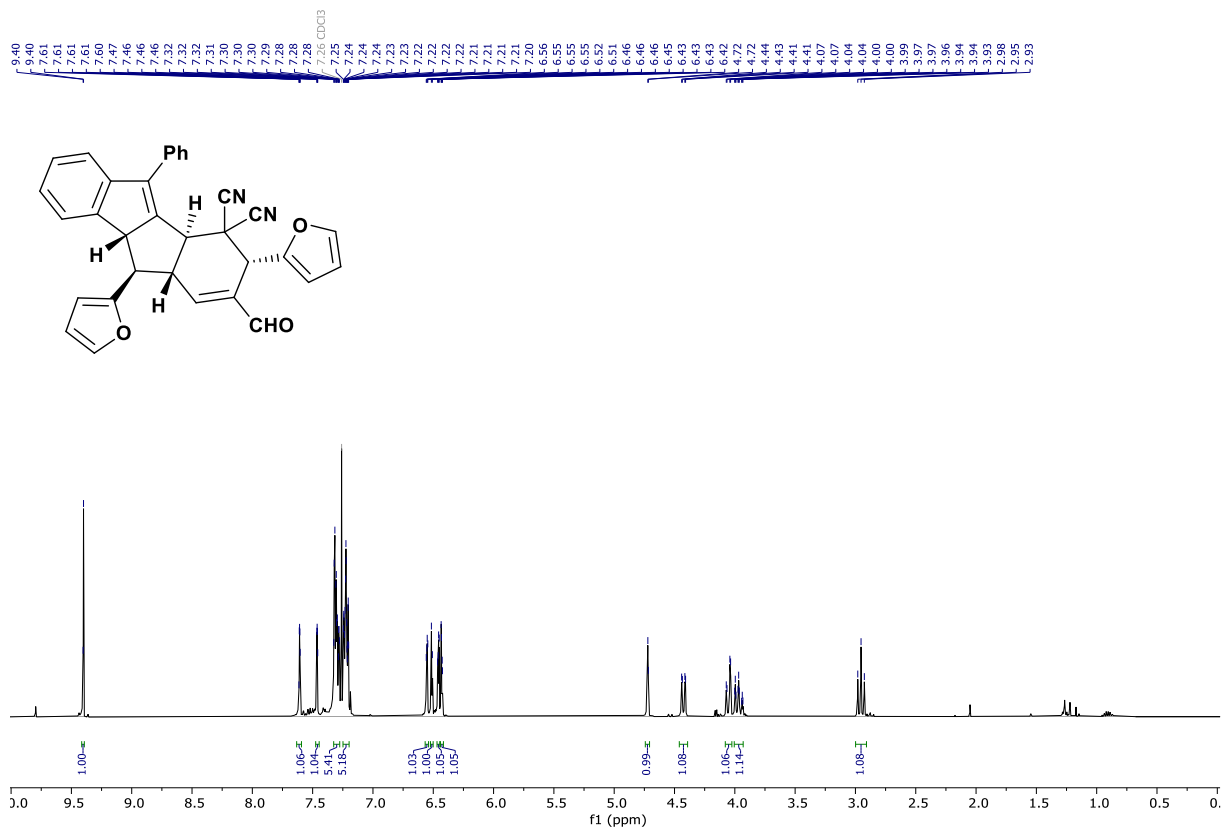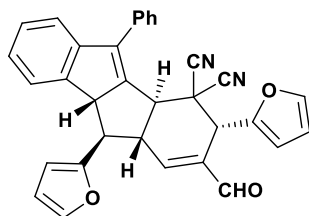

**<sup>13</sup>C NMR (176 MHz, CDCl<sub>3</sub>)**

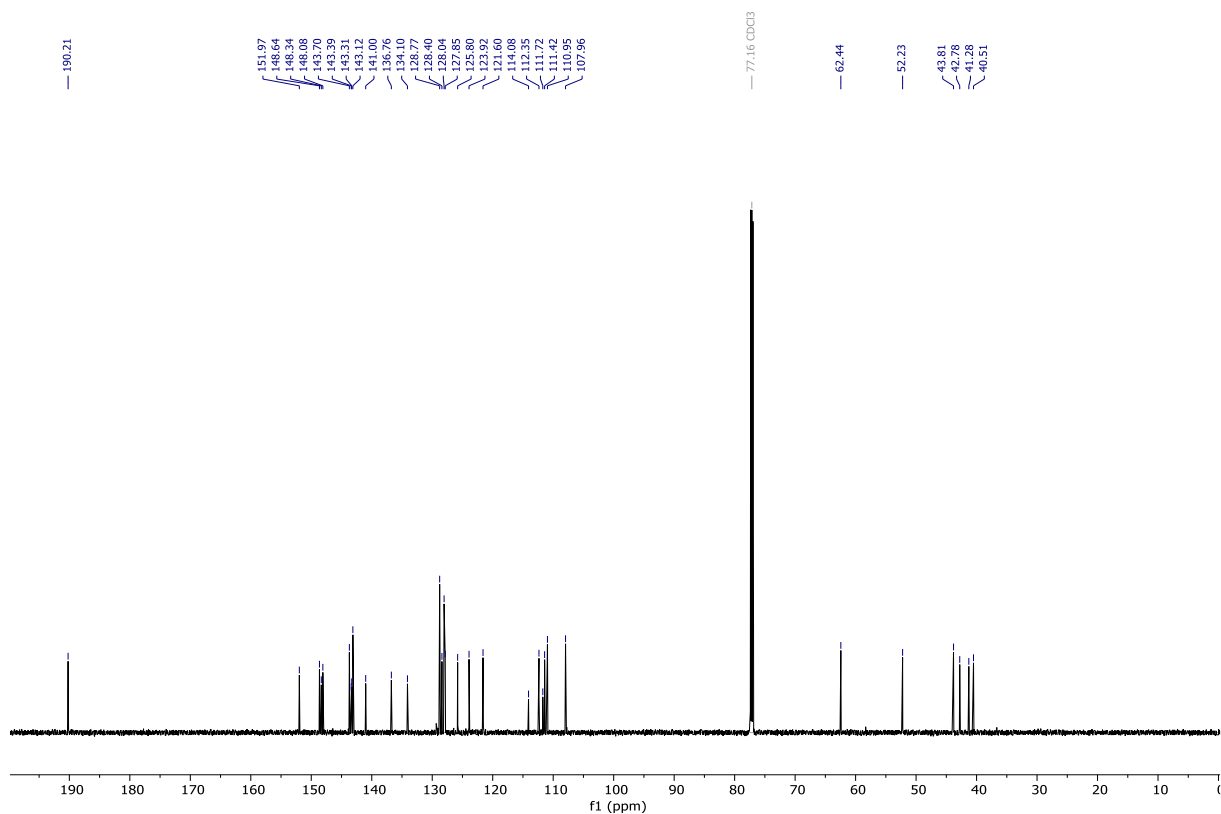

**(3*S*,4*aS*,9*bR*,10*R*,10*aR*)-2-formyl-7-methoxy-3,5,10-triphenyl-4*a*,9*b*,10,10*a*-tetrahydroindeno[2,1-*a*]indene-4,4(3*H*)-dicyanitrile **3i****

**<sup>1</sup>H NMR (700 MHz, CDCl<sub>3</sub>)**

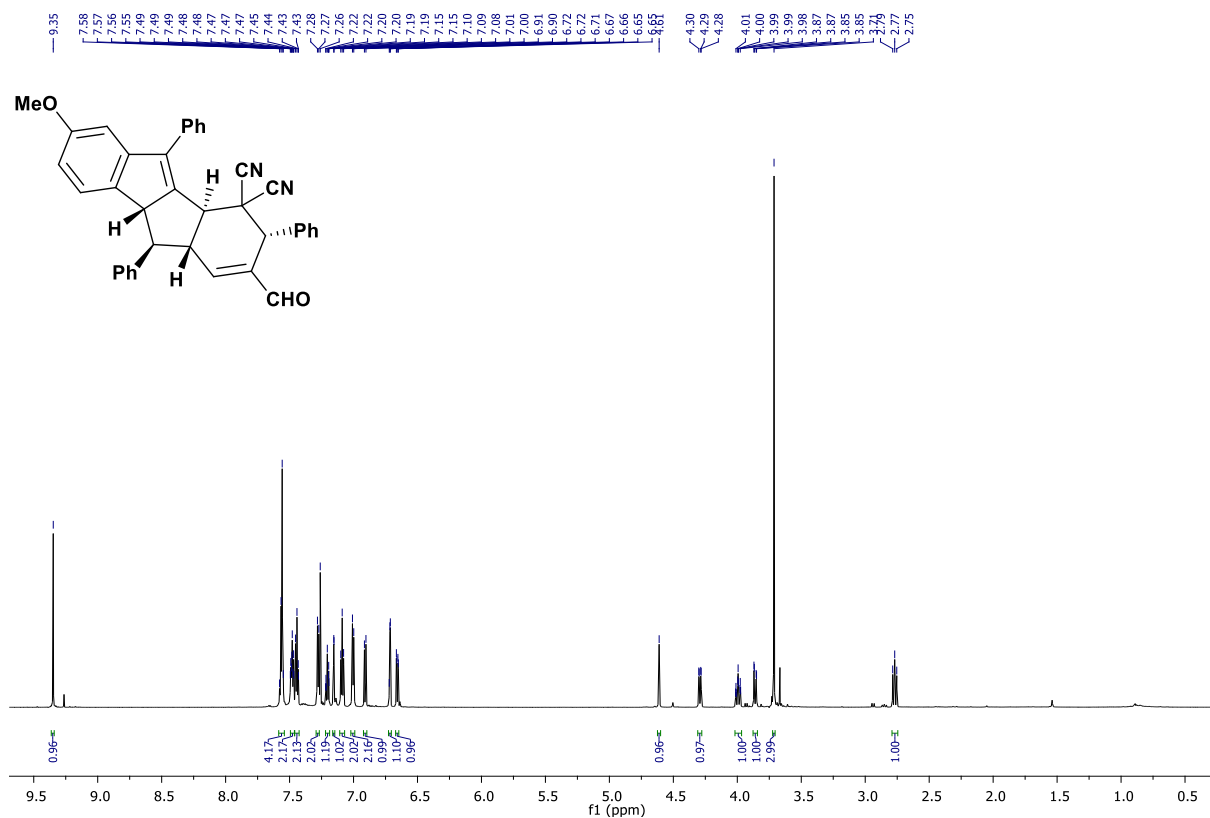

**<sup>13</sup>C NMR (176 MHz, CDCl<sub>3</sub>)**

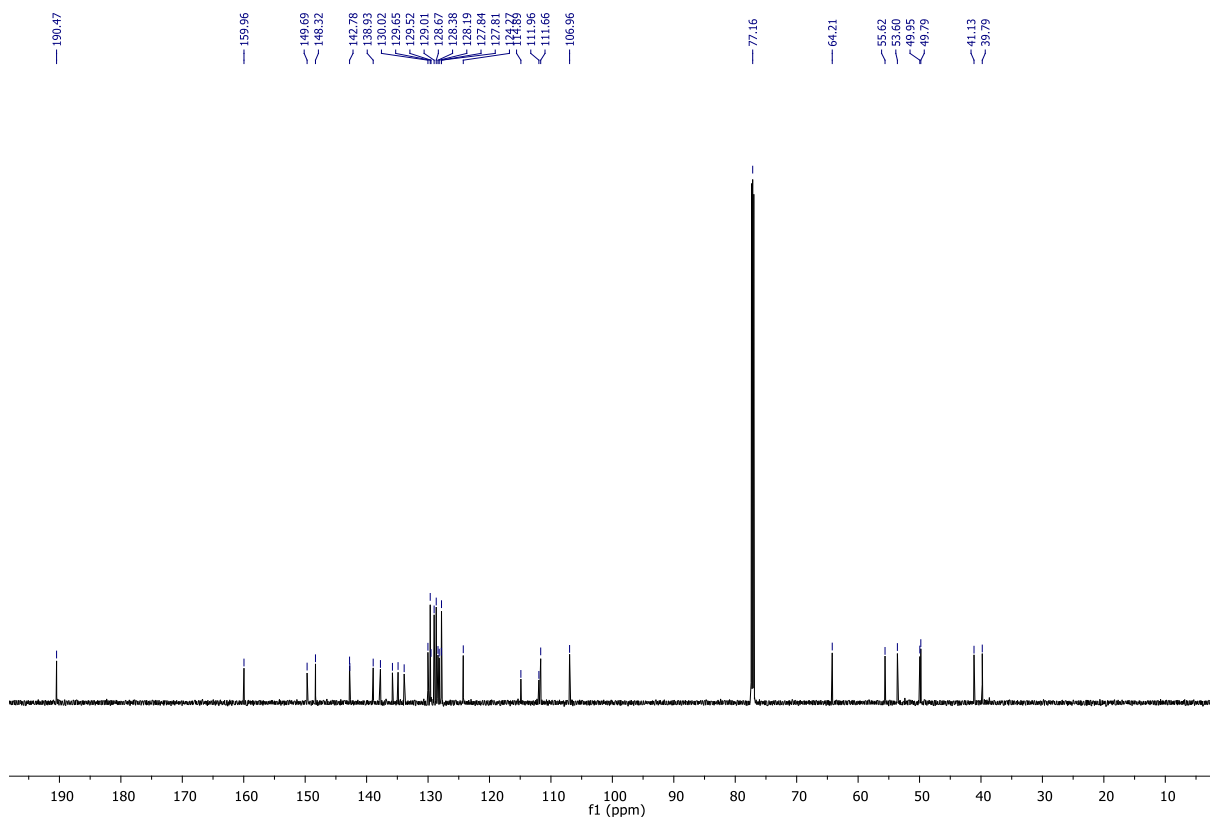

**(3S,4aS,9bR,10R,10aR)-2-formyl-8-methoxy-3,5,10-triphenyl-4a,9b,10,10a-tetrahydroindeno[2,1-a]indene-4,4(3H)-dicyanitrile 3j**

**$^1\text{H}$  NMR (700 MHz,  $\text{CDCl}_3$ )**

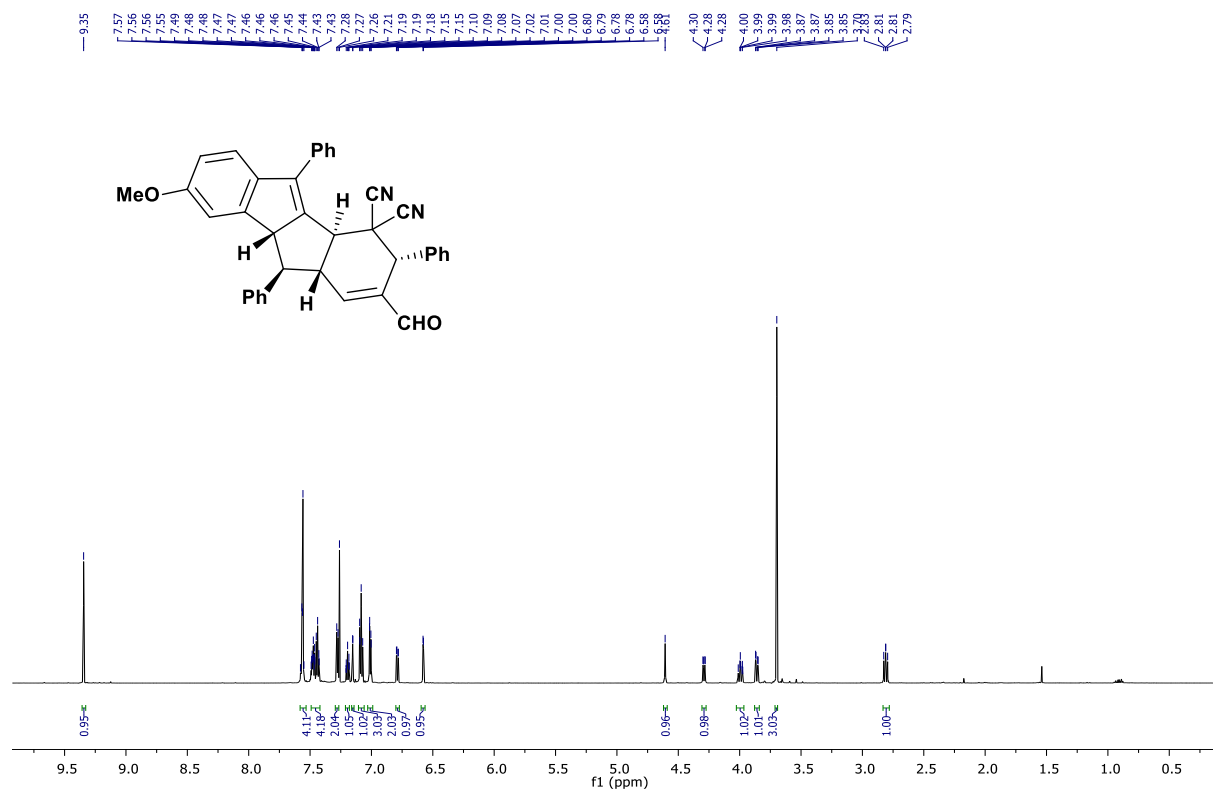

**$^{13}\text{C}$  NMR (176 MHz,  $\text{CDCl}_3$ )**

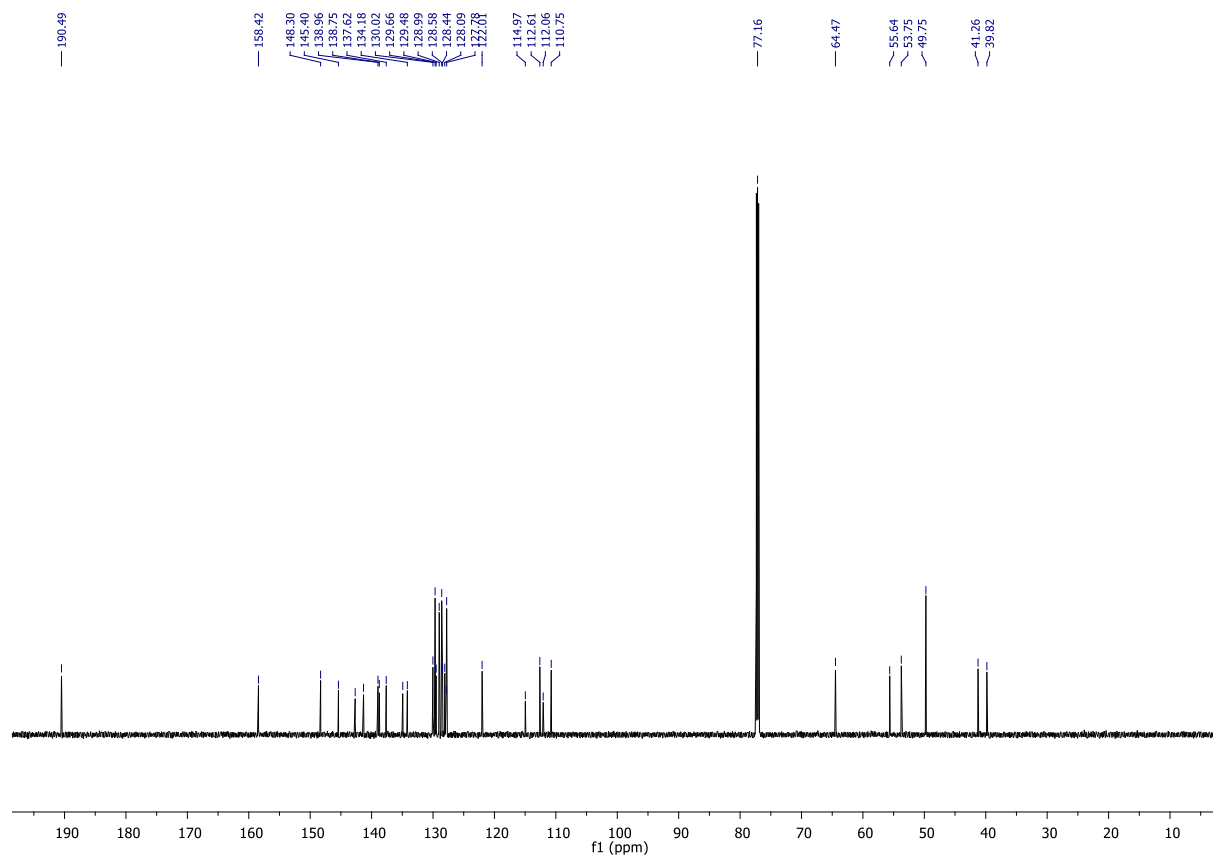

**(3*S*,4*aS*,9*bR*,10*R*,10*aR*)-2-formyl-7-methyl-3,5,10-triphenyl-4*a*,9*b*,10,10*a*-tetrahydroindeno[2,1-*a*]indene-4,4(3*H*)-dicarbonitrile 3k**

**<sup>1</sup>H NMR (700 MHz, CDCl<sub>3</sub>)**

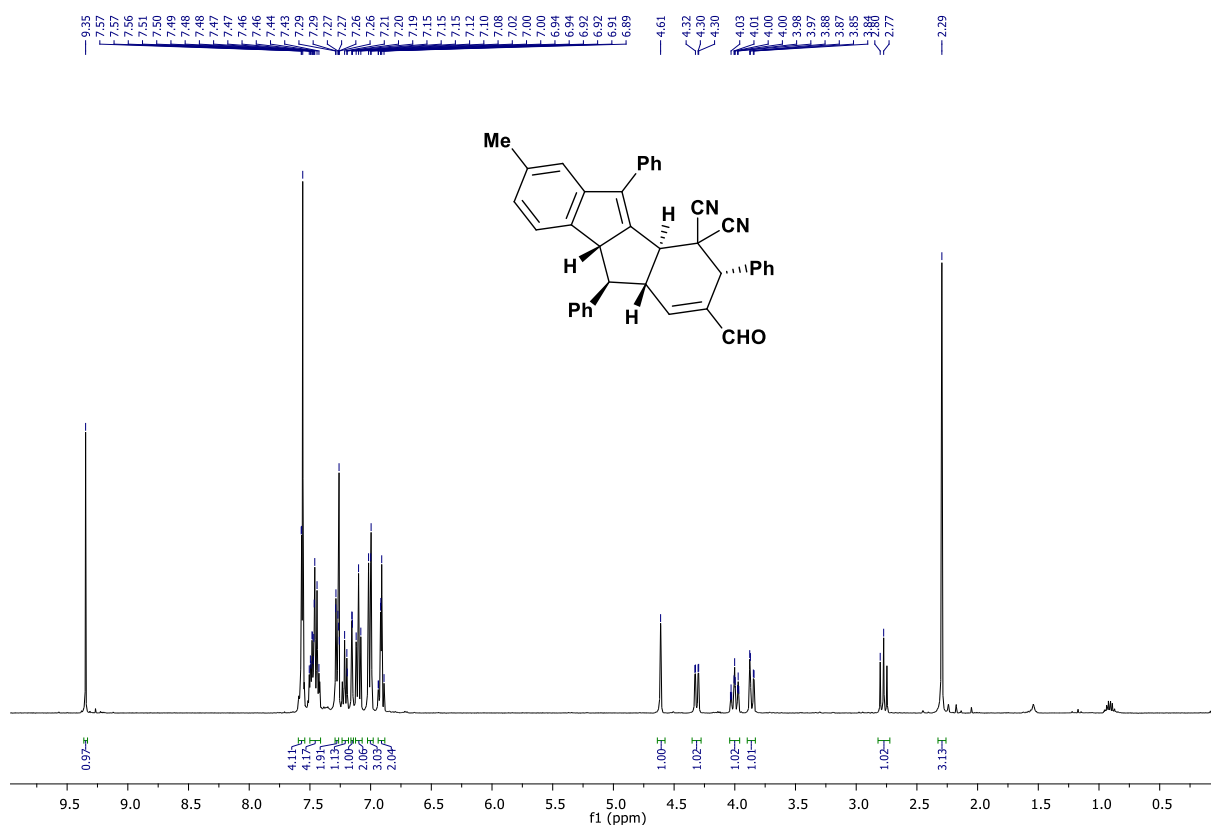

**<sup>13</sup>C NMR (176 MHz, CDCl<sub>3</sub>)**

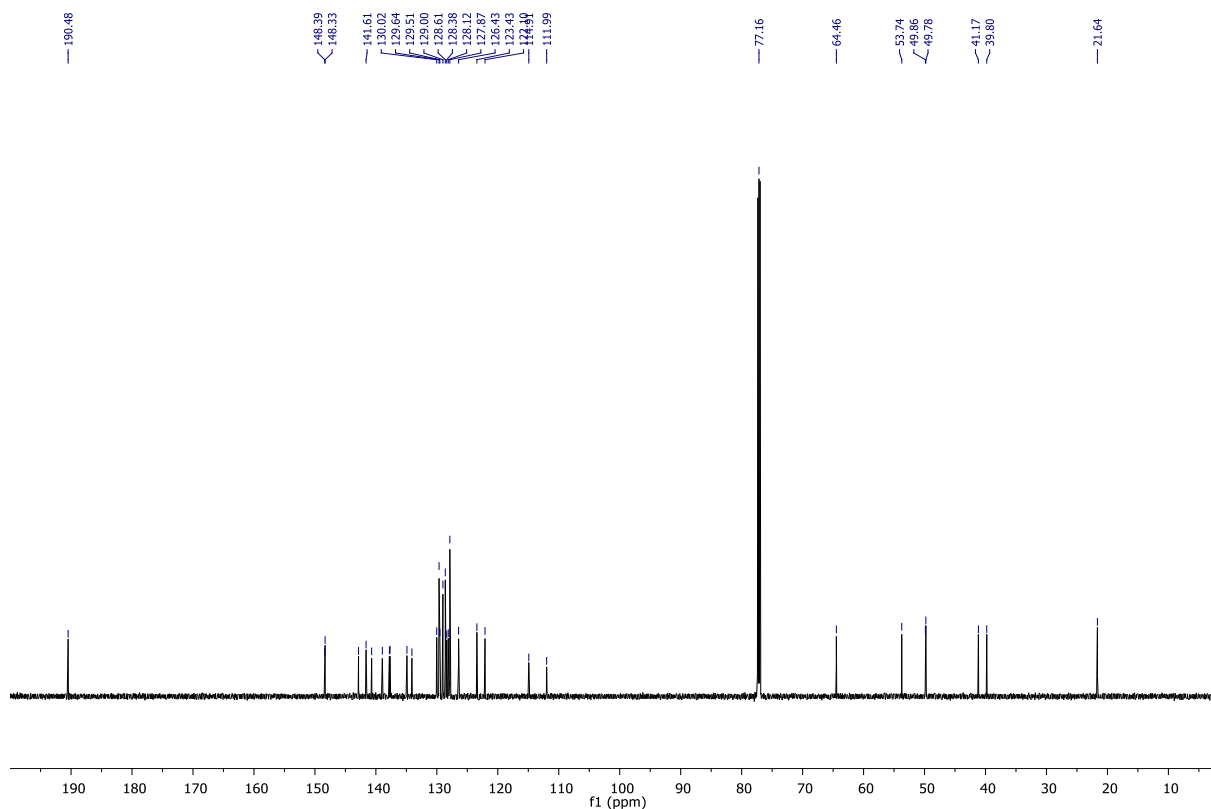

**(3S,4aS,9bR,10R,10aR)-8-bromo-2-formyl-3,5,10-triphenyl-4a,9b,10,10a-tetrahydroindeno[2,1-a]indene-4,4(3H)-dicarbonitrile 3l**

**$^1\text{H}$  NMR (700 MHz,  $\text{CDCl}_3$ )**

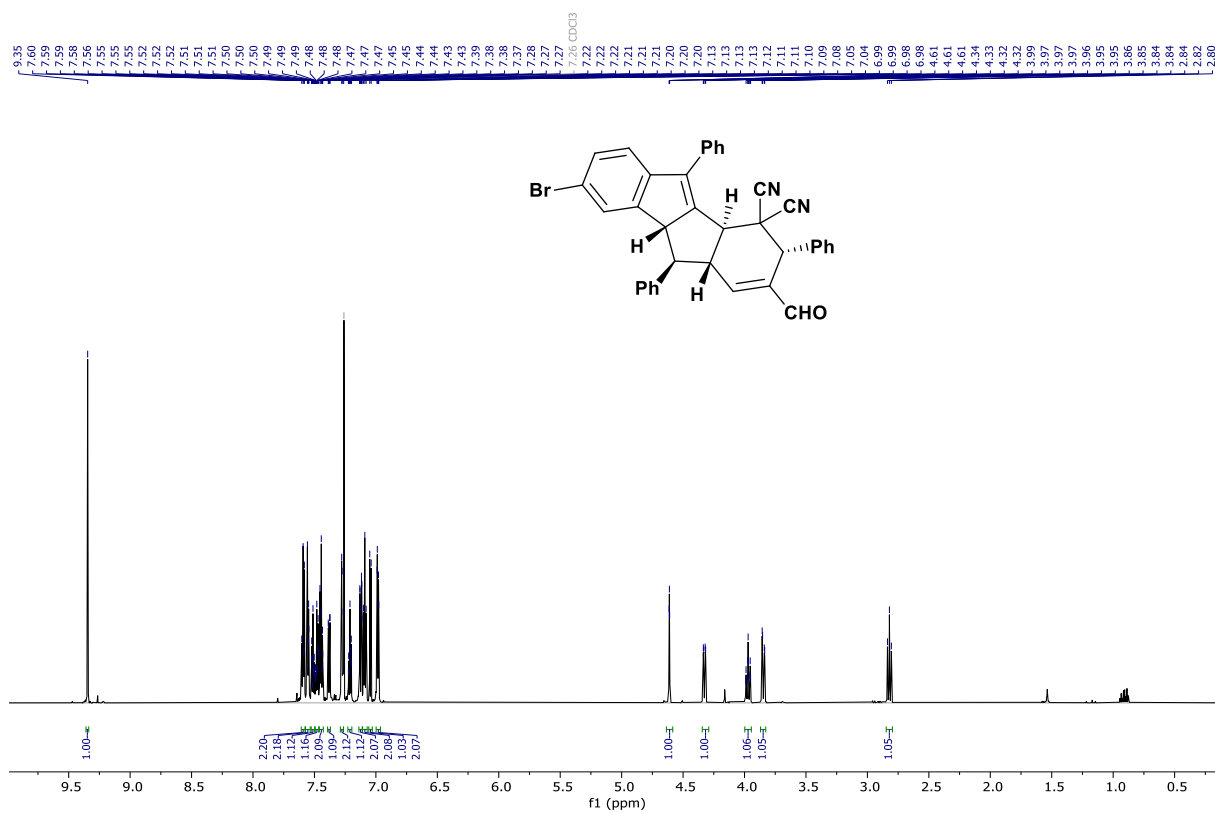

**$^{13}\text{C}$  NMR (176 MHz,  $\text{CDCl}_3$ )**

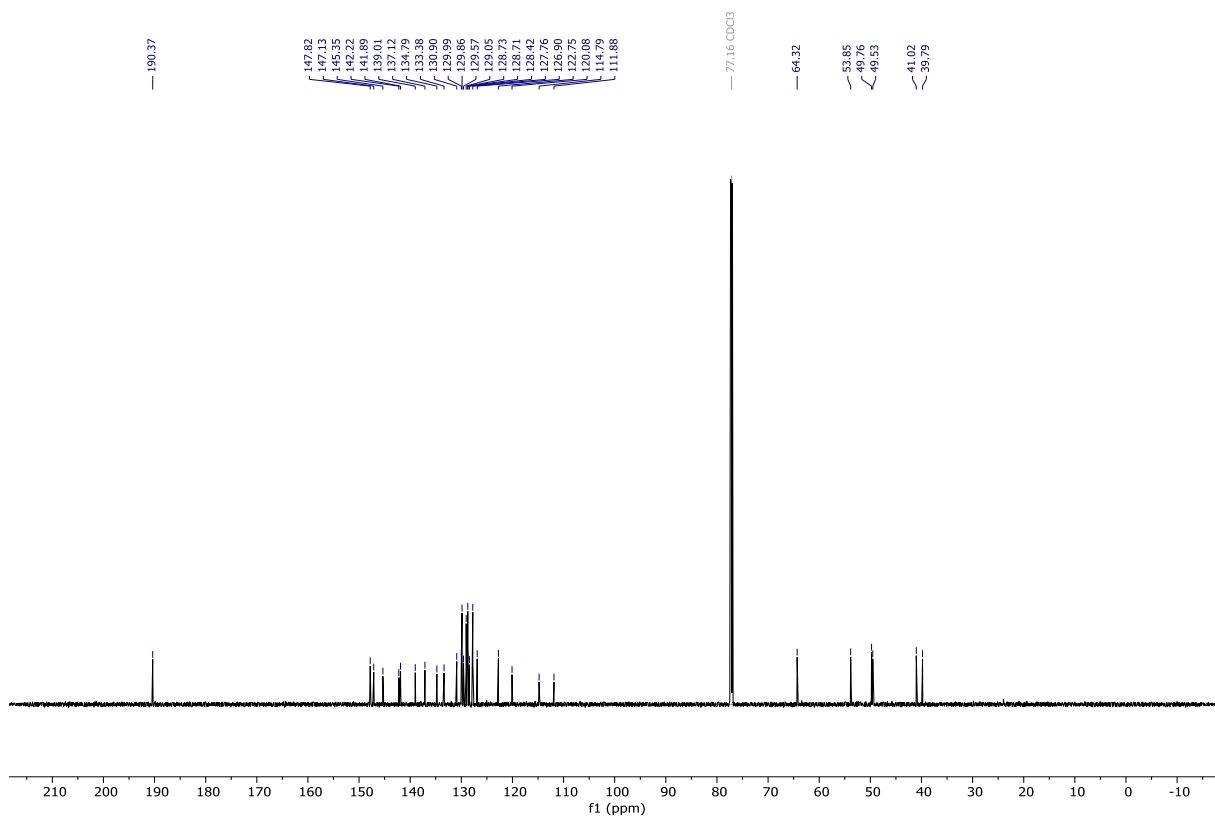

**(3S,4aS,9bS,10R,10aR)-9-bromo-2-formyl-3,5,10-triphenyl-4a,9b,10,10a-tetrahydroindeno[2,1-a]indene-4,4(3H)-dicarbonitrile 3m**

**$^1\text{H}$  NMR (700 MHz,  $\text{CDCl}_3$ )**

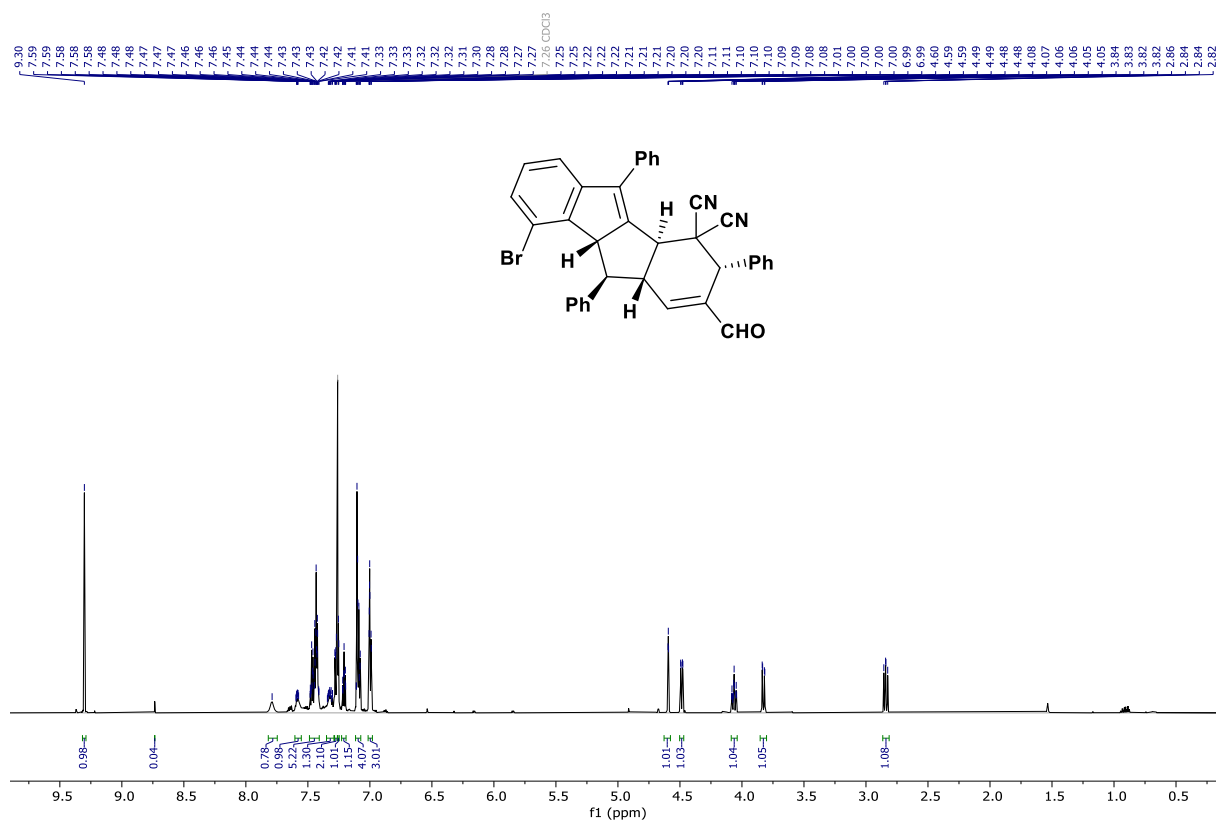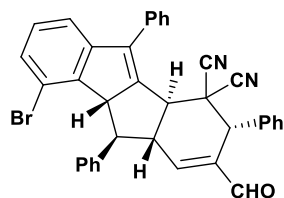

**$^{13}\text{C}$  NMR (176 MHz,  $\text{CDCl}_3$ )**

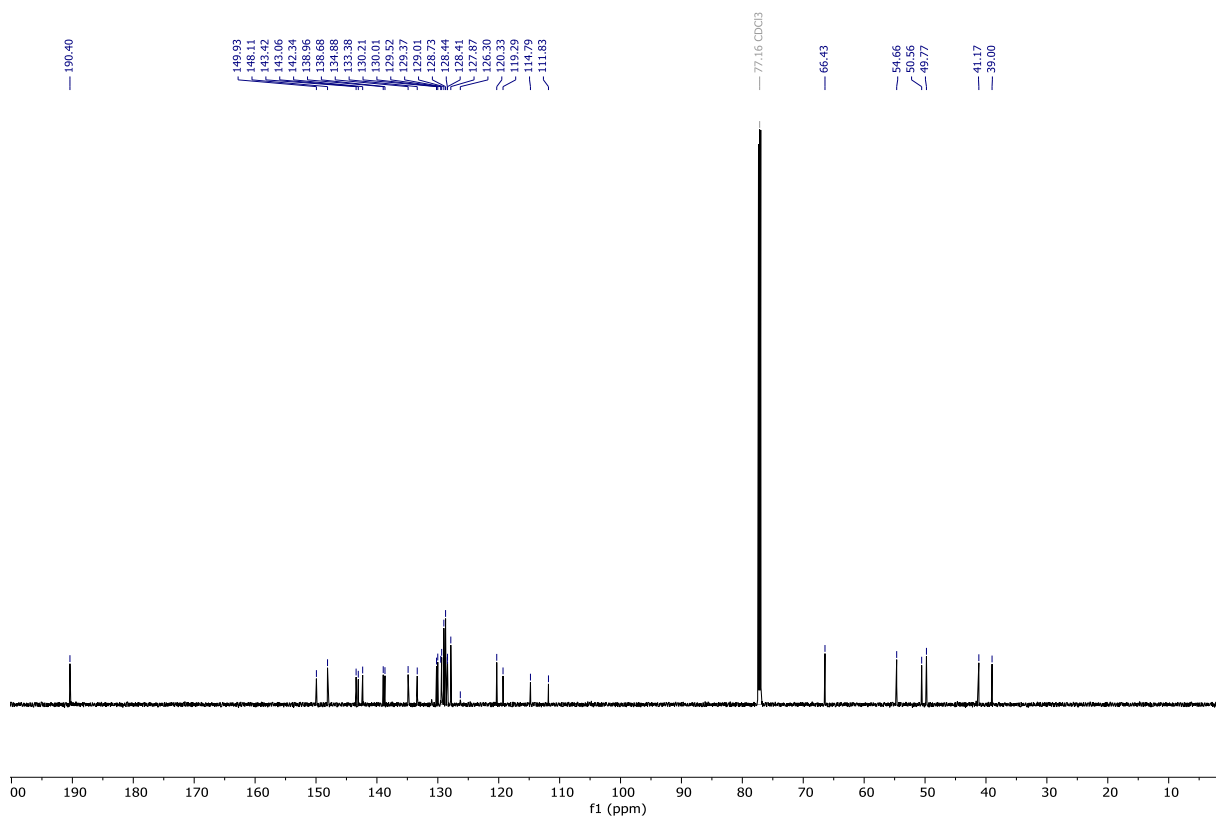



**(3S,4aS,9bR,10R,10aR)-2-formyl-5-(4-methoxyphenyl)-3,10-diphenyl-4a,9b,10,10a-tetrahydroindeno[2,1-a]indene-4,4(3H)-dicarbonitrile 3n**

**$^1\text{H NMR}$  (700 MHz,  $\text{CDCl}_3$ )**

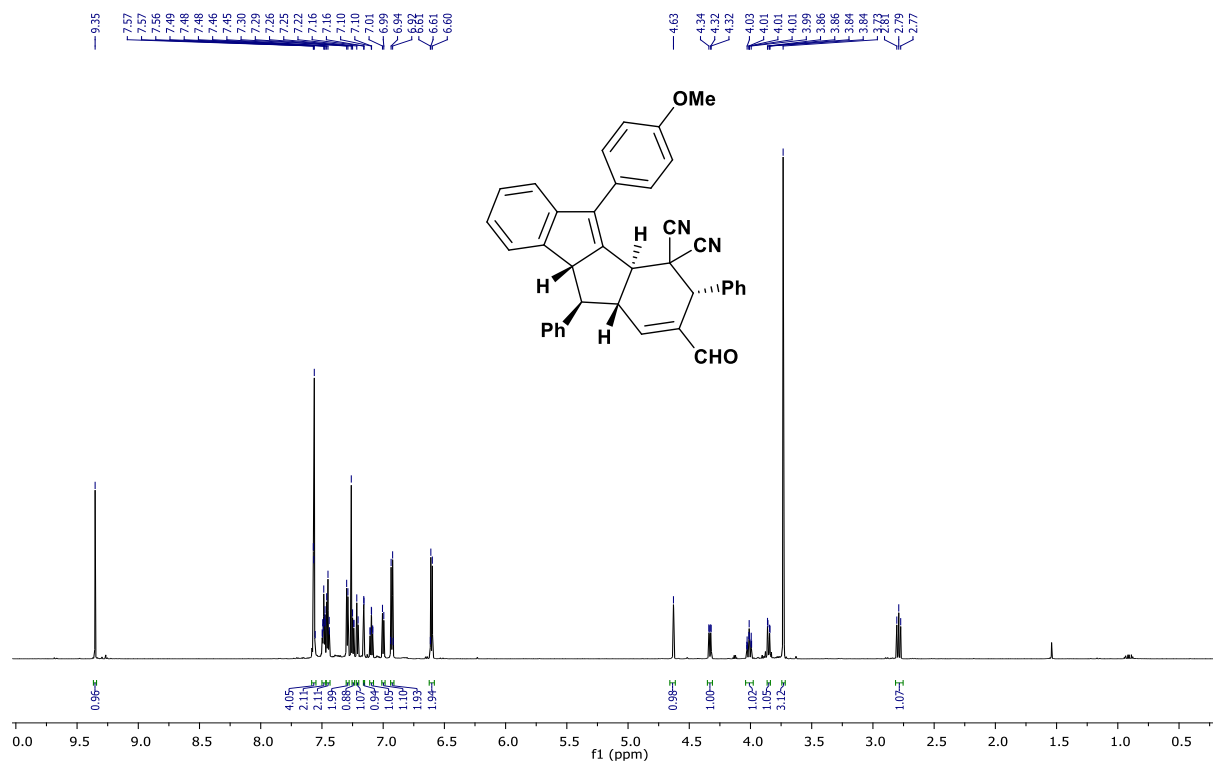

**$^{13}\text{C NMR}$  (176 MHz,  $\text{CDCl}_3$ )**

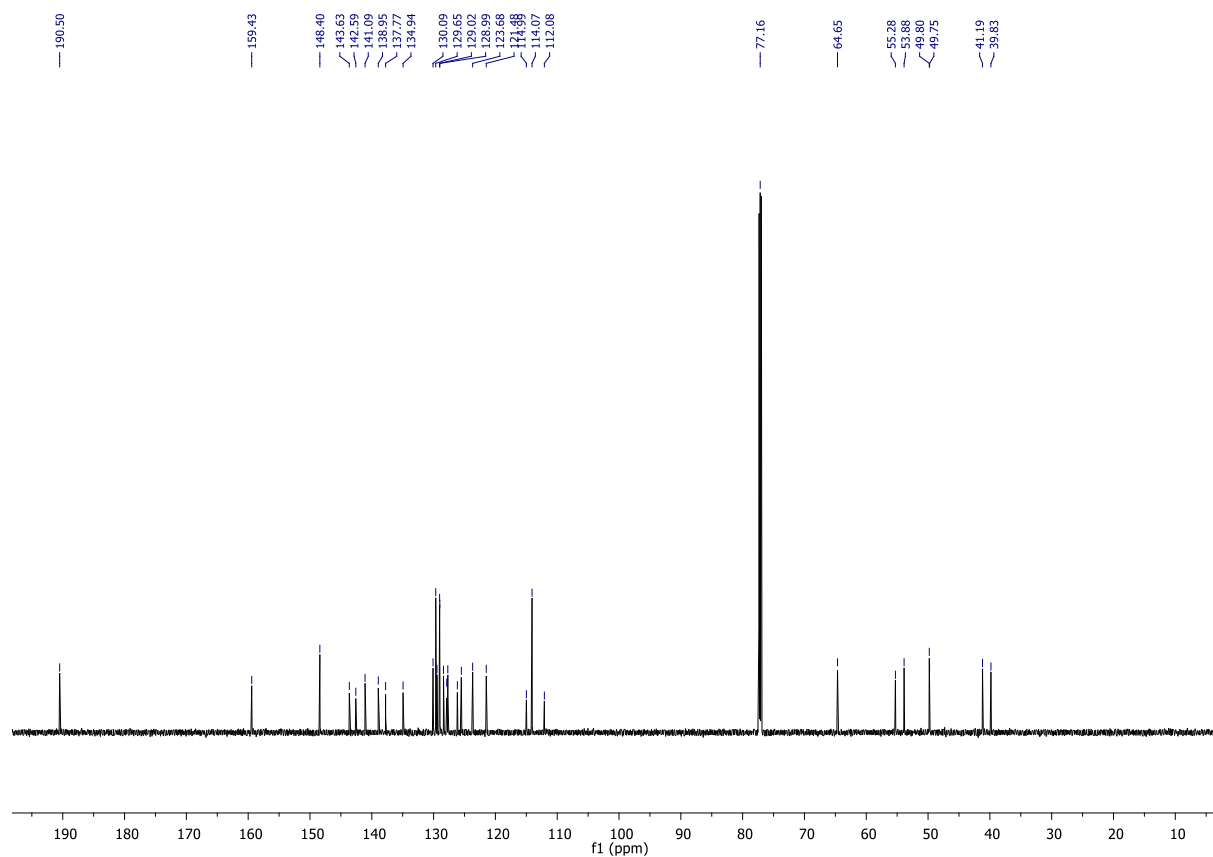

**(3*S*,4*aS*,9*bR*,10*R*,10*aR*)-5-(4-fluorophenyl)-2-formyl-3,10-diphenyl-4*a*,9*b*,10,10*a*-tetrahydroindeno[2,1-*a*]indene-4,4(3*H*)-dicarbonitrile 3o**

**<sup>1</sup>H NMR (700 MHz, CDCl<sub>3</sub>)**

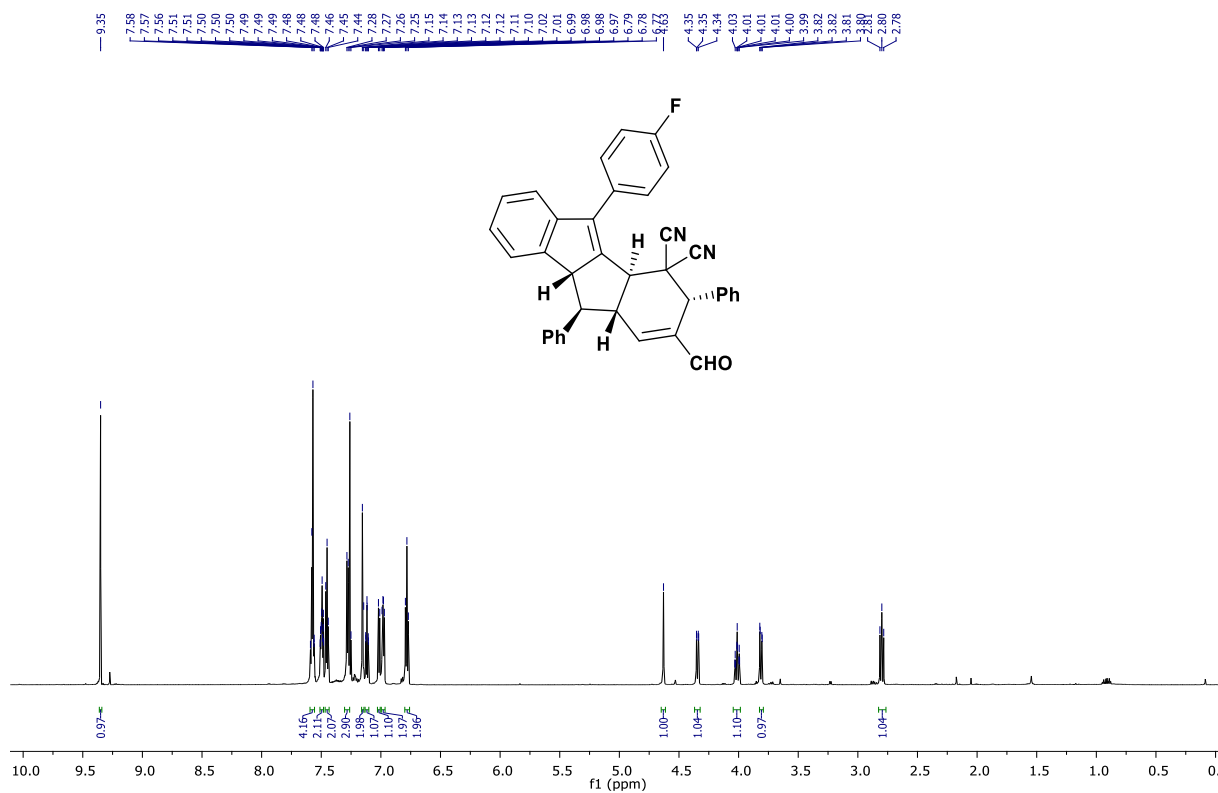

**<sup>13</sup>C NMR (176 MHz, CDCl<sub>3</sub>)**

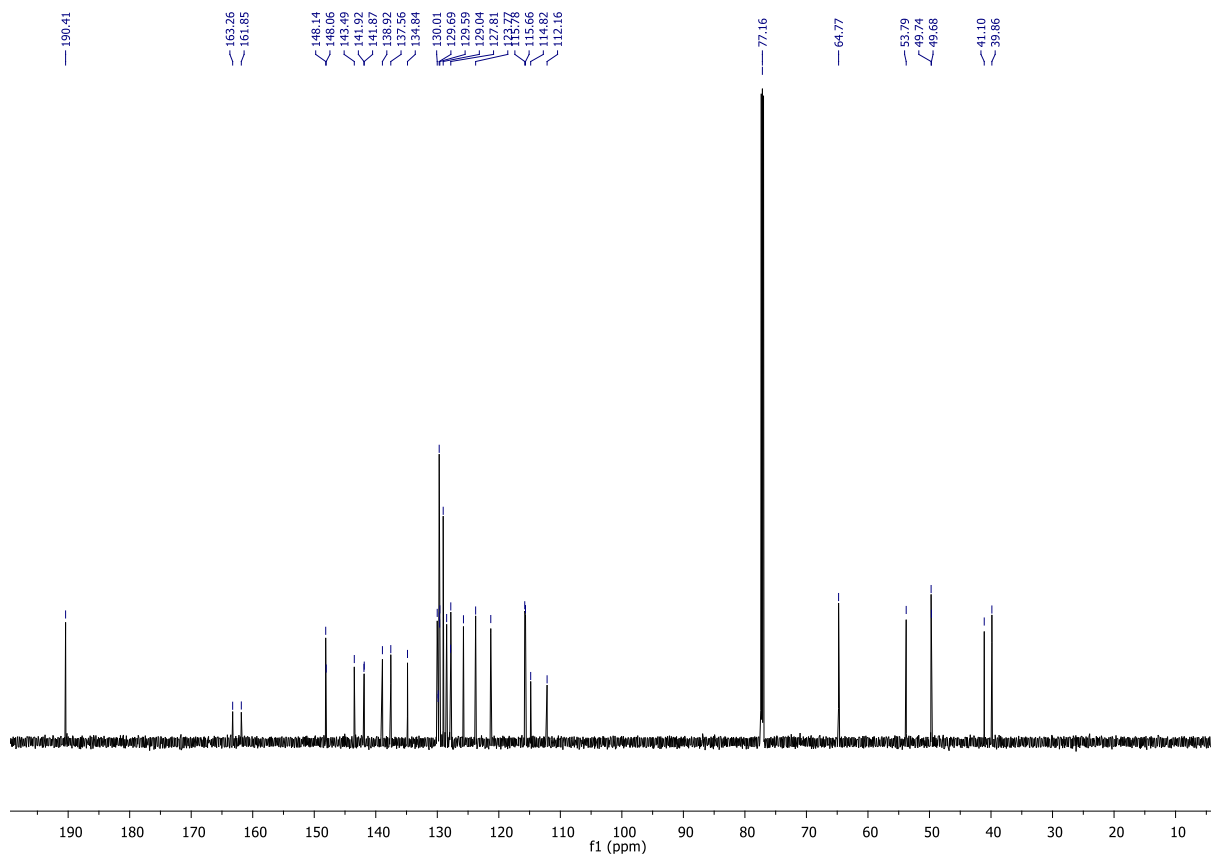

**$^{19}\text{F}$  NMR (376 MHz,  $\text{CDCl}_3$ )**

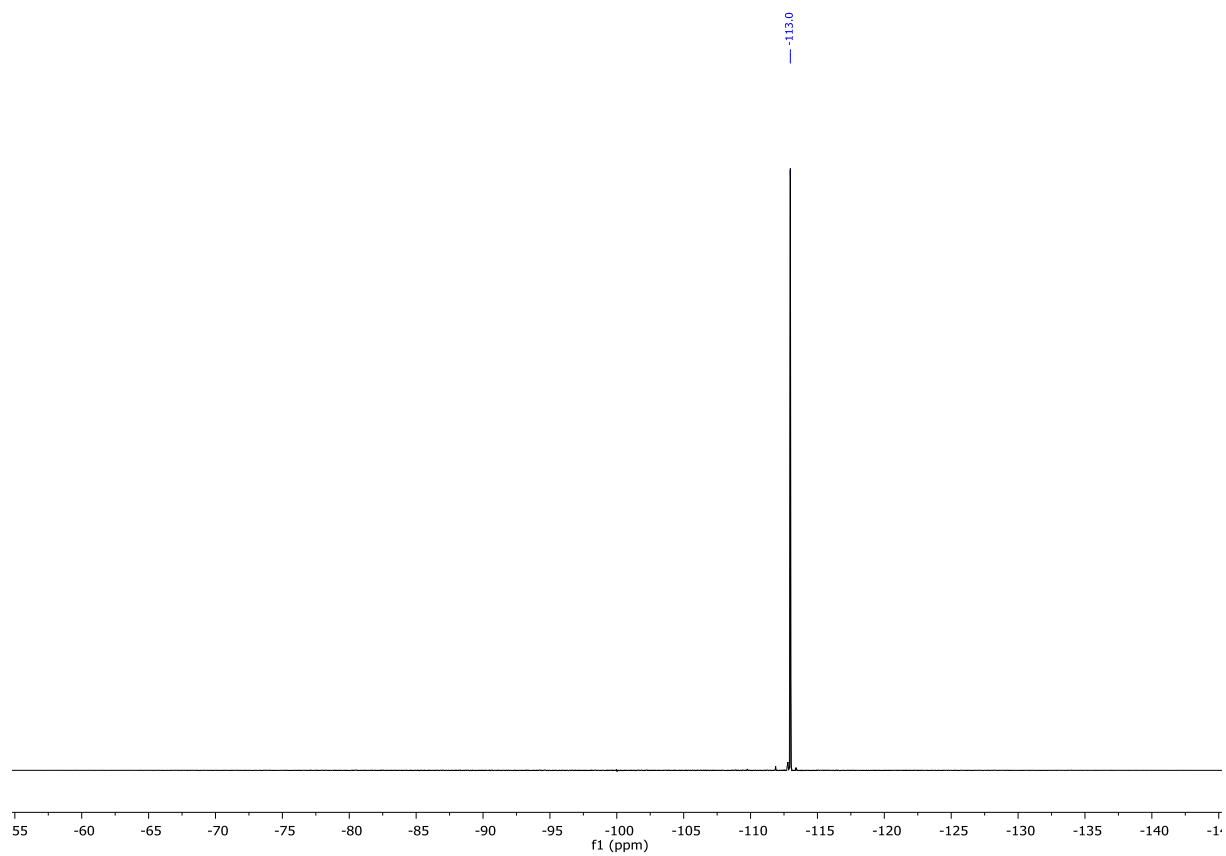

**(3*S*,4*aS*,9*bR*,10*R*,10*aR*)-5-([1,1'-biphenyl]-4-yl)-2-formyl-3,10-diphenyl-4*a*,9*b*,10,10*a*-tetrahydroindeno[2,1-*a*]indene-4,4(3*H*)-dicarbonitrile 3p**

**<sup>1</sup>H NMR (700 MHz, CDCl<sub>3</sub>)**

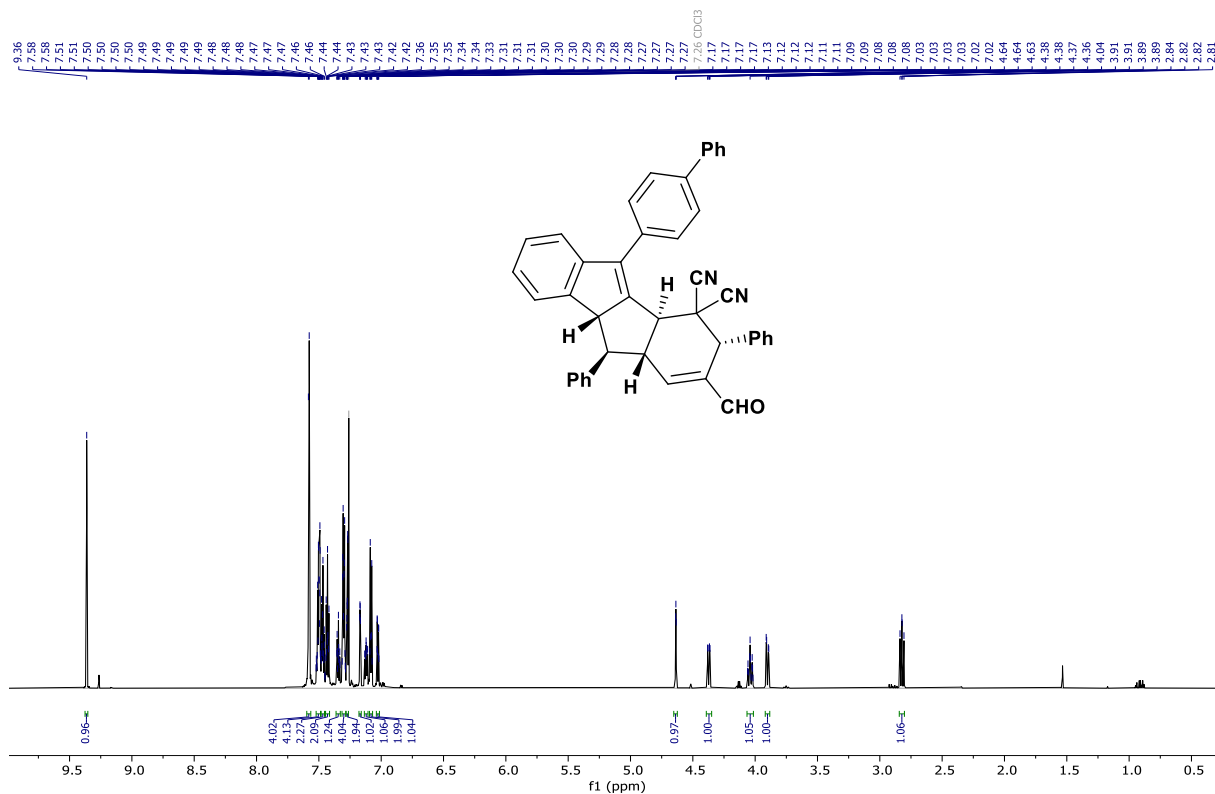

**<sup>13</sup>C NMR (176 MHz, CDCl<sub>3</sub>)**

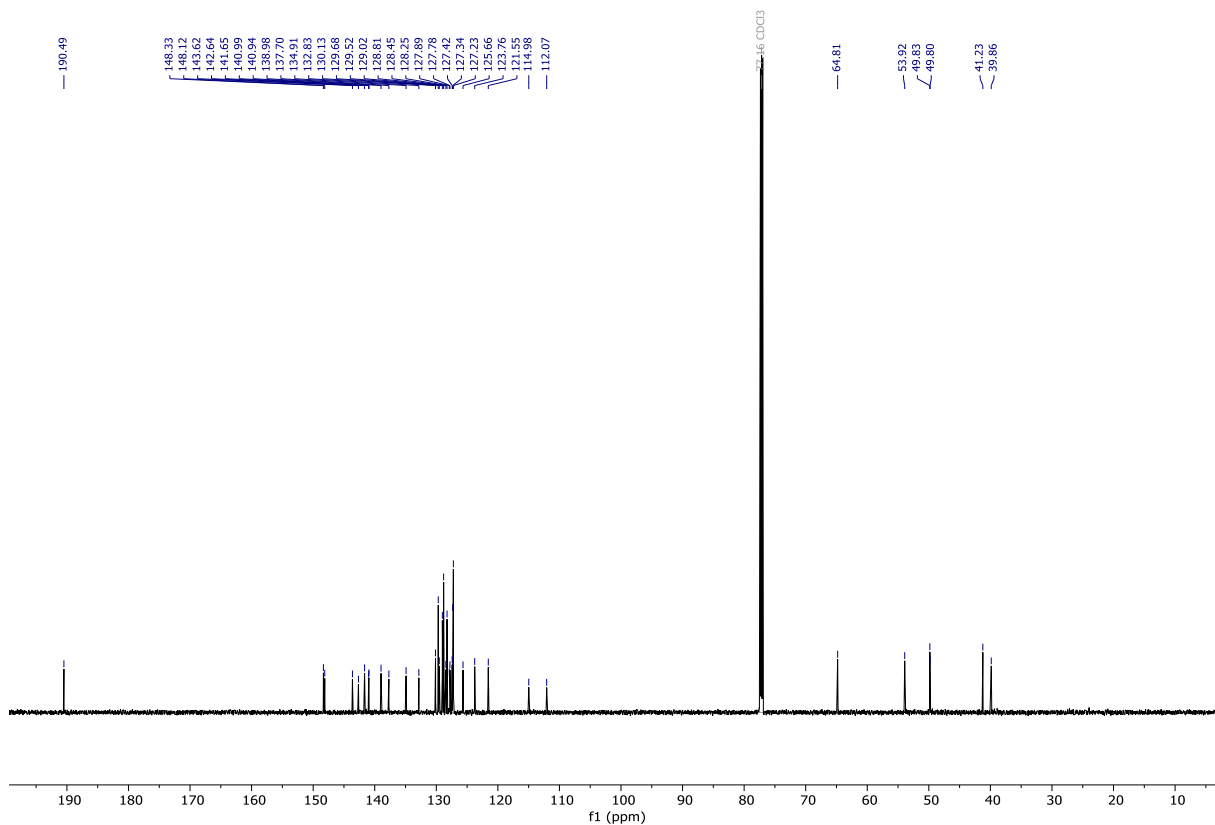

**(3*S*,4*aS*,9*bR*,10*R*,10*aR*)-2-formyl-5-(5-methylthiophen-2-yl)-3,10-diphenyl-4*a*,9*b*,10,10*a*-tetrahydroindeno[2,1-*a*]indene-4,4(3*H*)-dicarbonitrile 3q**

**$^1\text{H NMR}$  (700 MHz,  $\text{CDCl}_3$ )**

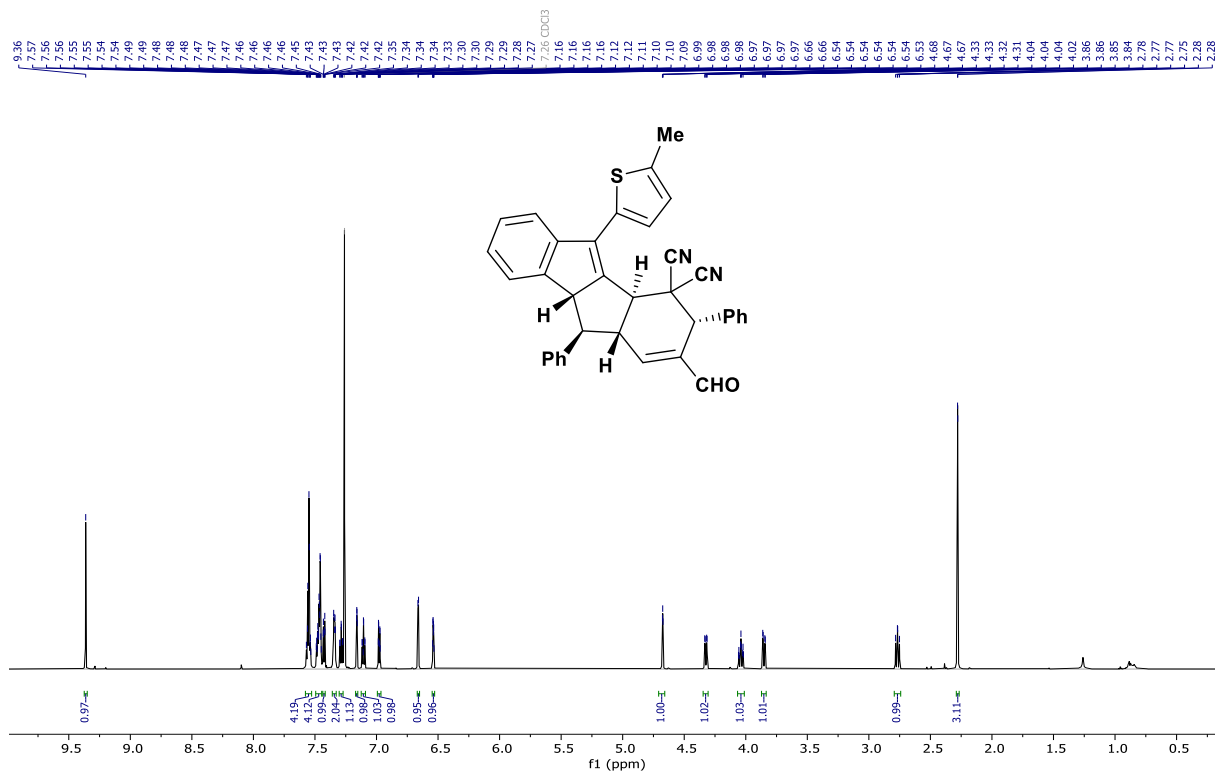

(3*S*,4*aS*,9*bS*,10*R*,10*aR*)-2-formyl-3,10-diphenyl-4*a*,9*b*,10,10*a*-tetrahydroindeno[2,1-  
a]indene-4,4(3*H*)-dicarbonitrile **3r**

<sup>1</sup>H NMR (700 MHz, CDCl<sub>3</sub>)

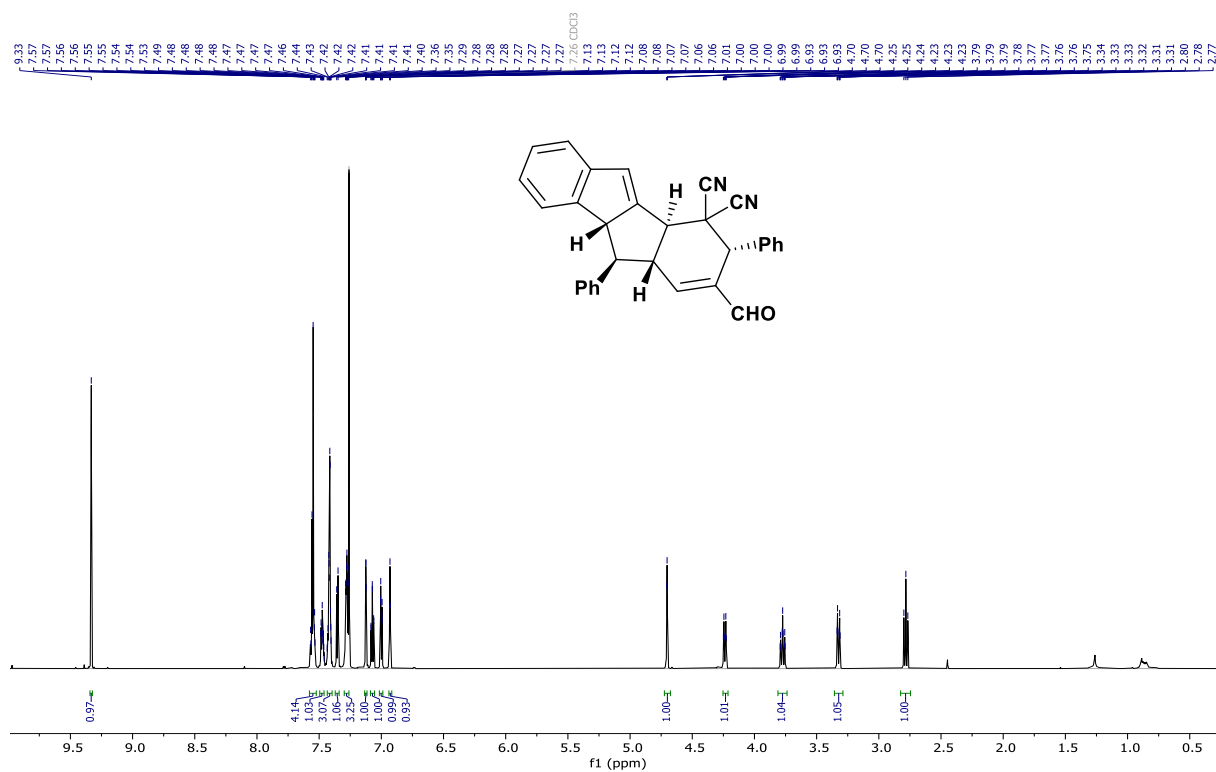

<sup>13</sup>C NMR (176 MHz, CDCl<sub>3</sub>)

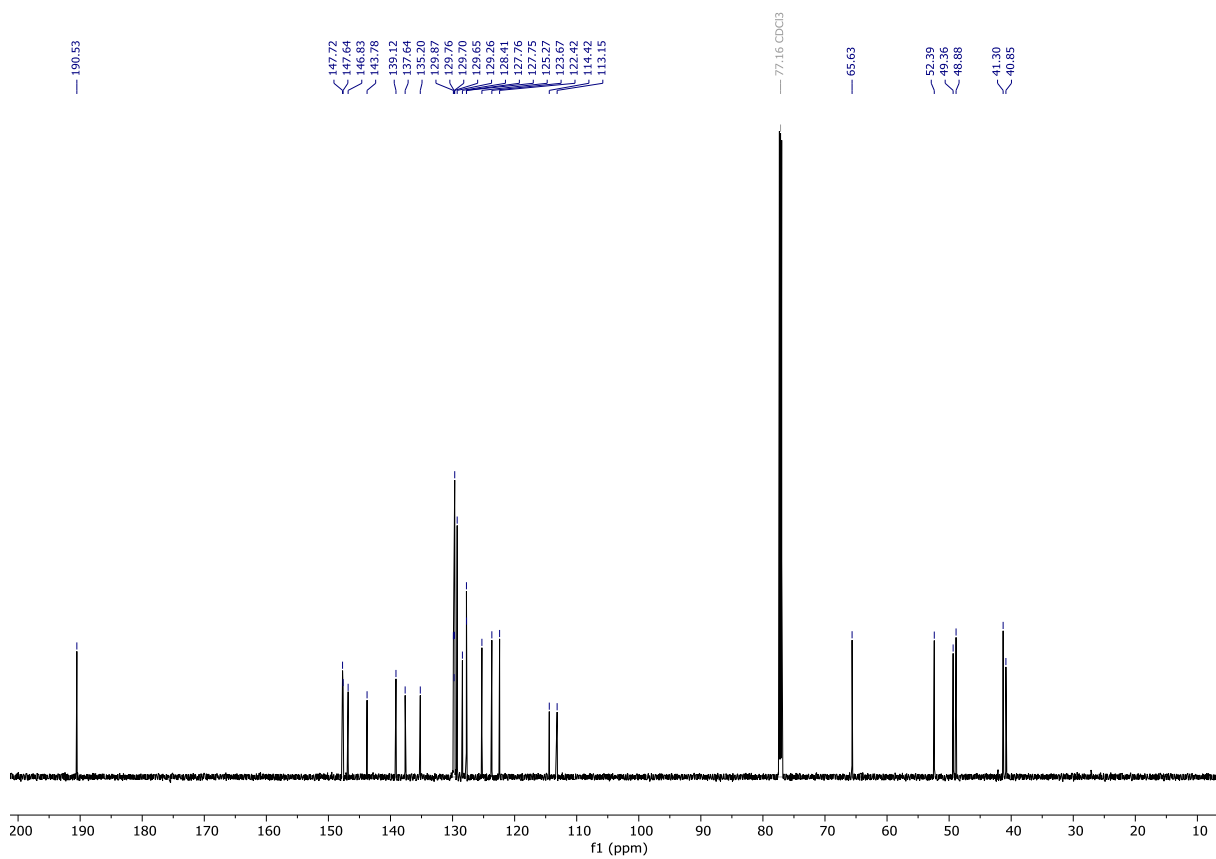

**(3*S*,4*aS*,9*bR*,10*R*,10*aR*)-2-(hydroxymethyl)-3,5,10-triphenyl-4*a*,9*b*,10,10*a*-tetrahydroindeno  
[2,1-*a*]indene-4,4(3*H*)-dicarbonitrile 10a**

**<sup>1</sup>H NMR (700 MHz, CDCl<sub>3</sub>)**

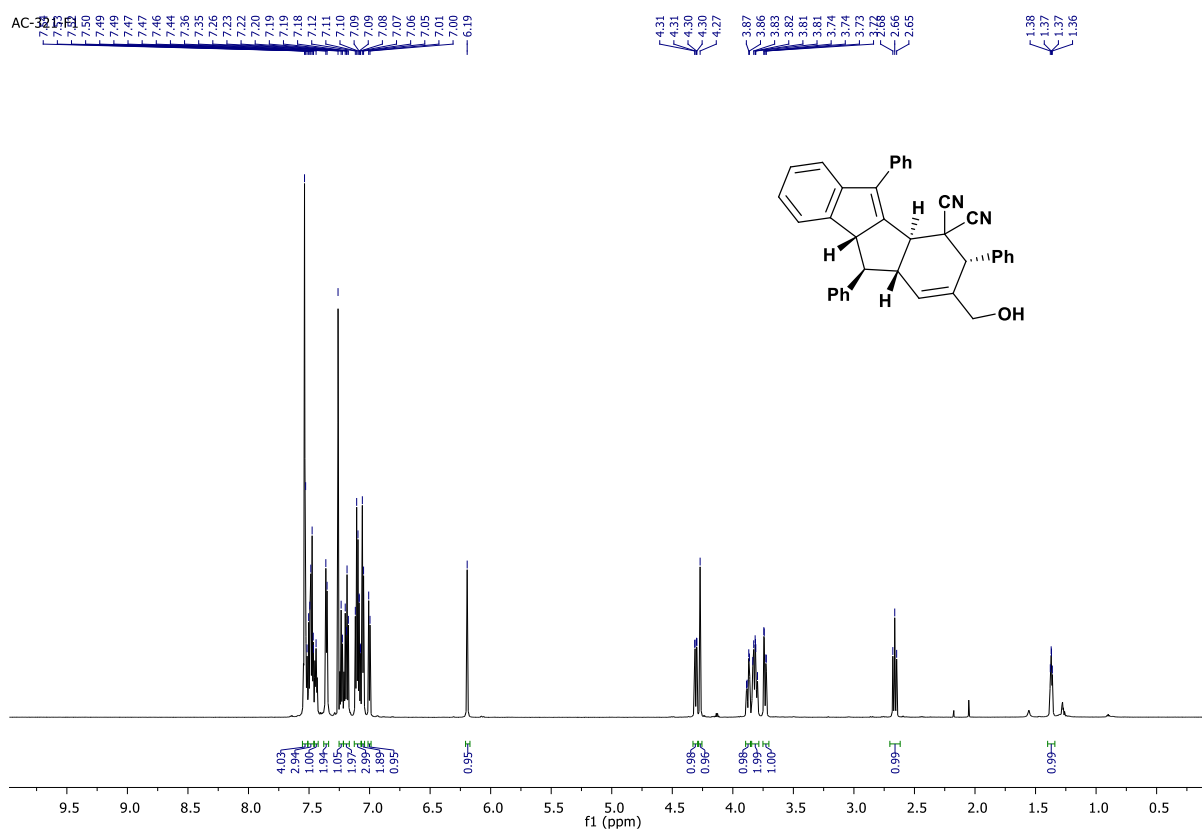

**<sup>13</sup>C NMR (176 MHz, CDCl<sub>3</sub>)**

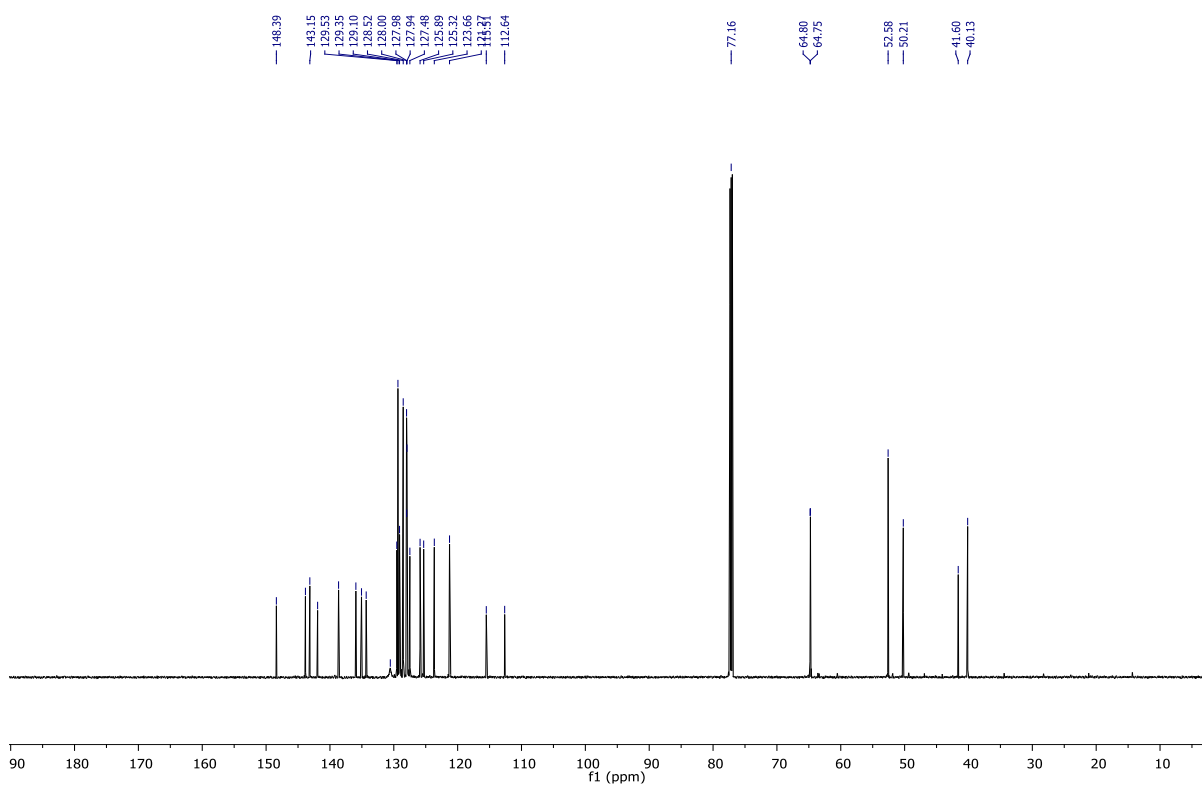

(3*S*,4*aS*,9*bR*,10*R*,10*aR*)-2-formyl-3,5,8,10-tetraphenyl-4*a*,9*b*,10,10*a*-tetrahydroindeno

[2,1-*a*]indene-4,4(3*H*)-dicyanitrile 12l

<sup>1</sup>H NMR (700 MHz, CDCl<sub>3</sub>)

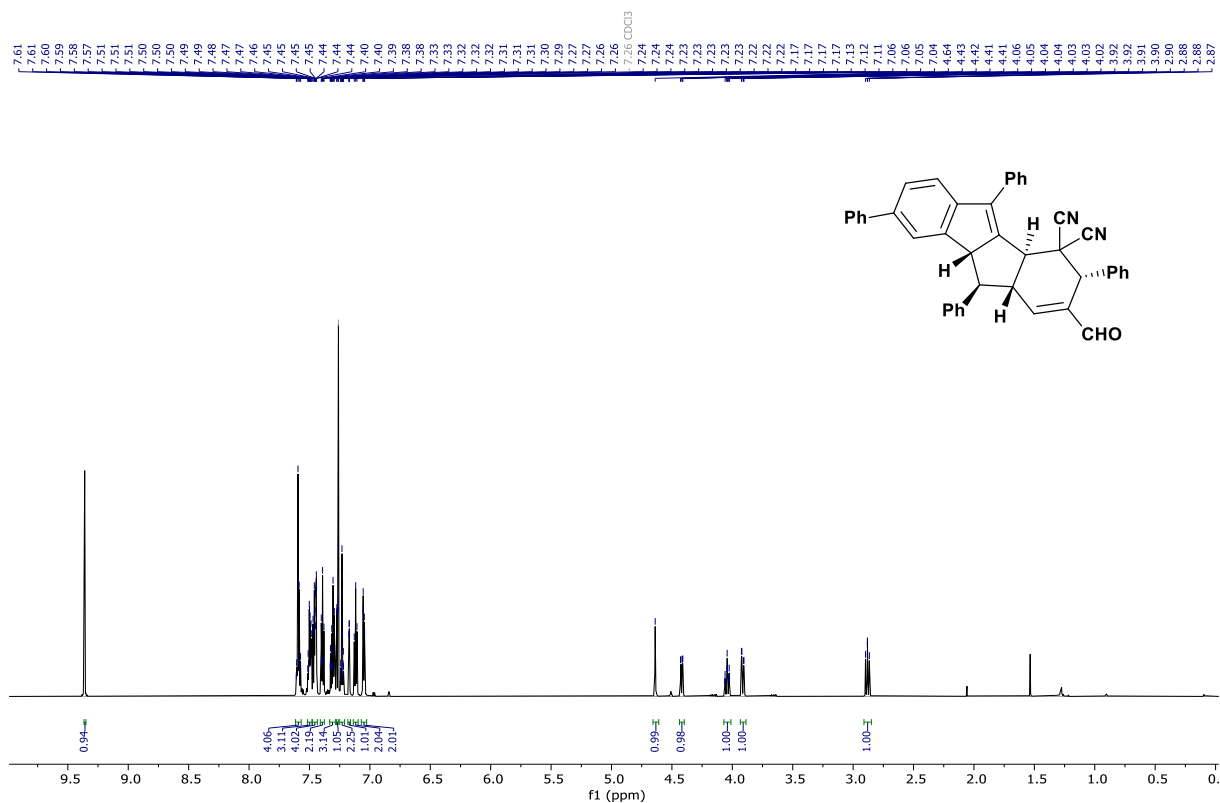

<sup>13</sup>C NMR (176 MHz, CDCl<sub>3</sub>)

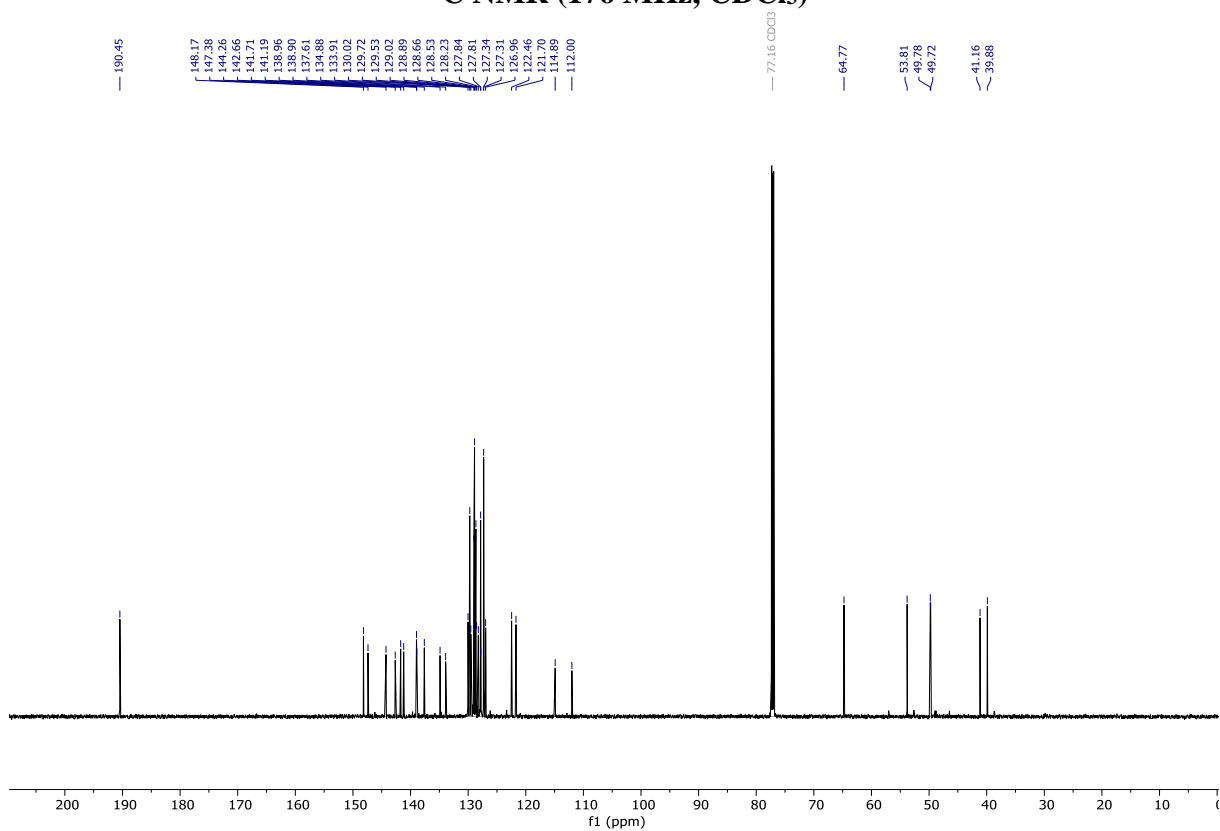



## 8. UPC<sup>2</sup> data

(3*S*,4*aS*,9*bR*,10*R*,10*aR*)-2-formyl-3,5,10-triphenyl-4*a*,9*b*,10,10*a*-tetrahydroindeno[2,1-*a*]indene-4,4(3*H*)-dicarbonitrile **3a**

Racemic sample

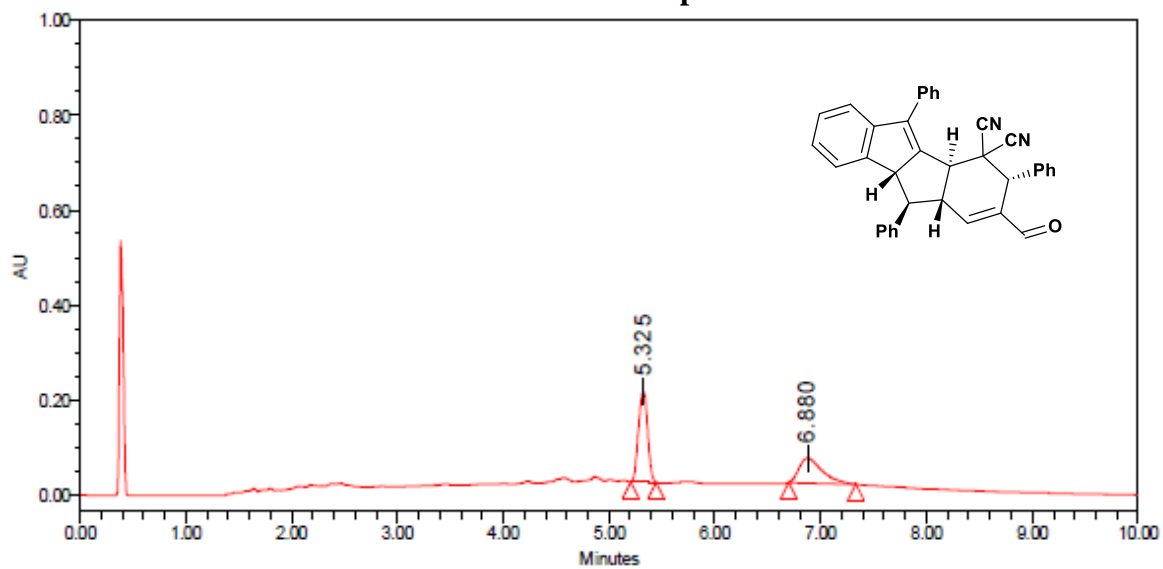

Peak Results

|   | RT    | % Area |
|---|-------|--------|
| 1 | 5.325 | 58.91  |
| 2 | 6.880 | 41.09  |

Enantiomerically enriched sample

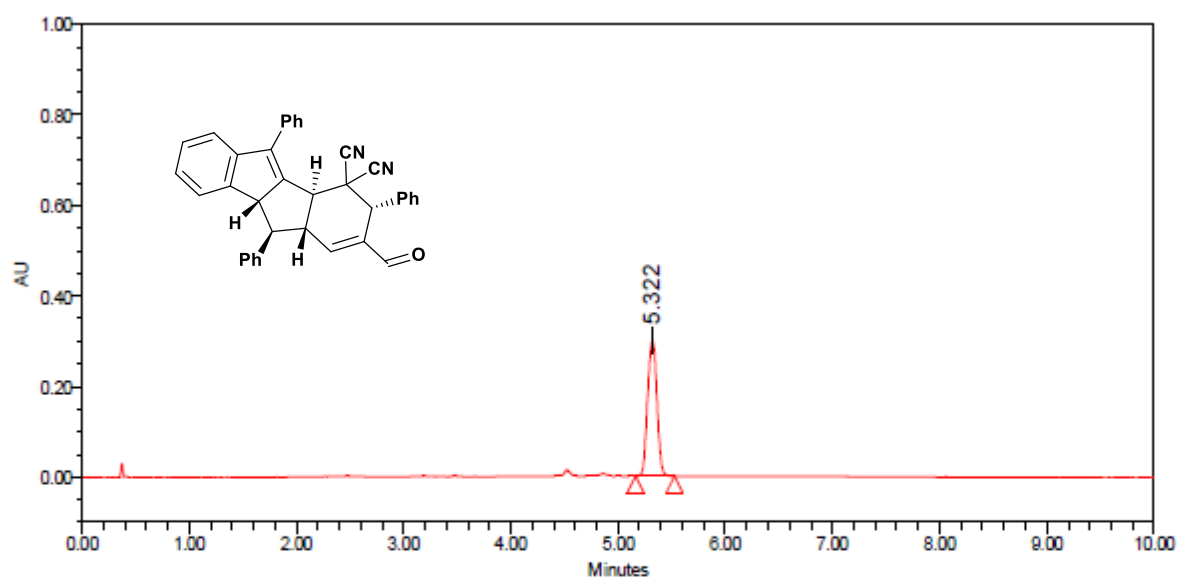

Peak Results

|   | RT    | % Area |
|---|-------|--------|
| 1 | 5.322 | 100.00 |

**(3*S*,4*aS*,9*bR*,10*R*,10*aR*)-2-formyl-3,10-bis(4-methoxyphenyl)-5-phenyl-4*a*,9*b*,10,10*a*-tetrahydroindeno[2,1-*a*]indene-4,4(3*H*)-dicyanitrile 3b**

**Racemic sample**

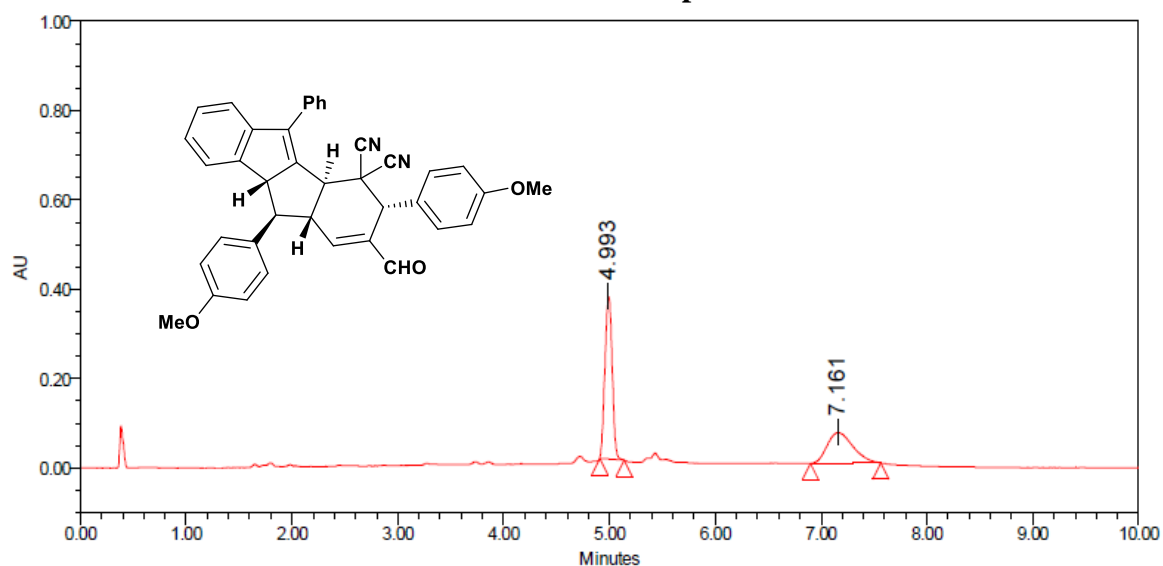

**Peak Results**

|   | RT    | % Area |
|---|-------|--------|
| 1 | 4.993 | 59.86  |
| 2 | 7.161 | 40.14  |

**Enantiomerically enriched sample**

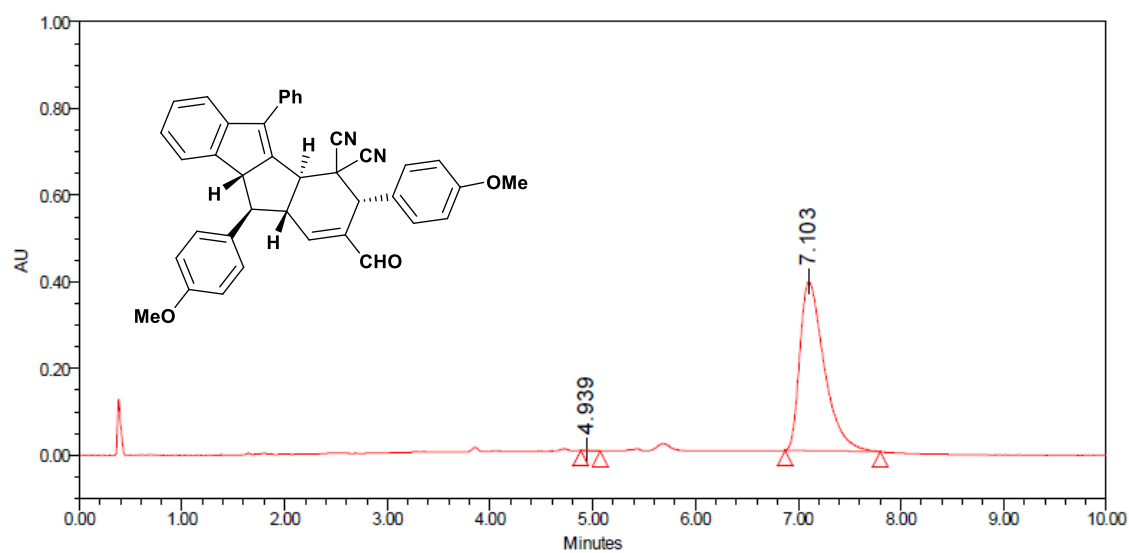

**Peak Results**

|   | RT    | % Area |
|---|-------|--------|
| 1 | 4.939 | 0.06   |
| 2 | 7.103 | 99.94  |

**(3*S*,4*aS*,9*bR*,10*R*,10*aR*)-2-formyl-3,10-bis(3-methoxyphenyl)-5-phenyl-4*a*,9*b*,10,10*a*-tetrahydroindeno[2,1-*a*]indene-4,4(3*H*)-dicarbonitrile 3c**

**Racemic sample**

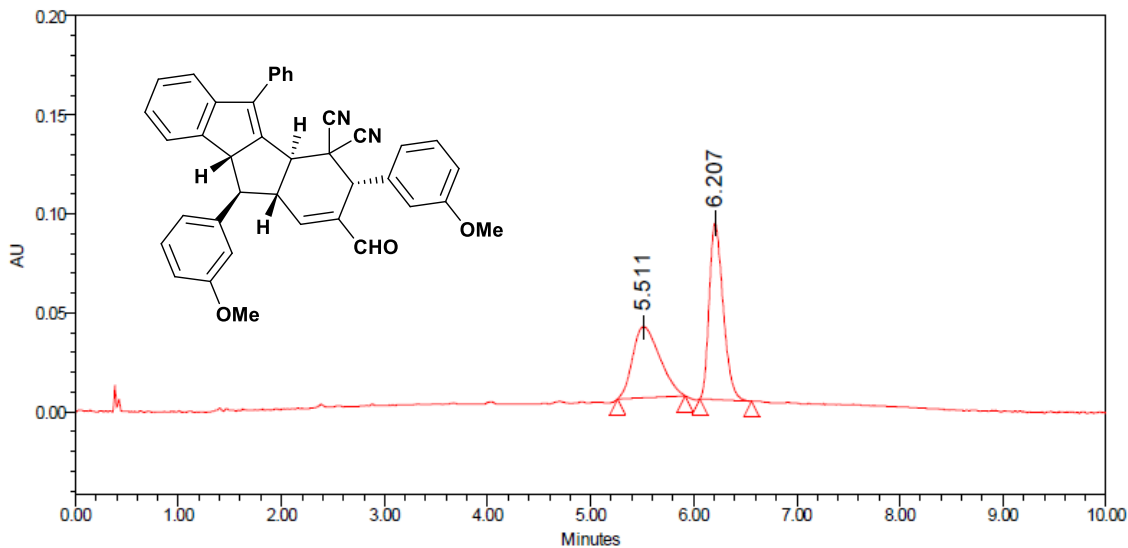

**Peak Results**

|   | RT    | % Area |
|---|-------|--------|
| 1 | 5.511 | 43.94  |
| 2 | 6.207 | 56.06  |

**Enantiomerically enriched sample**

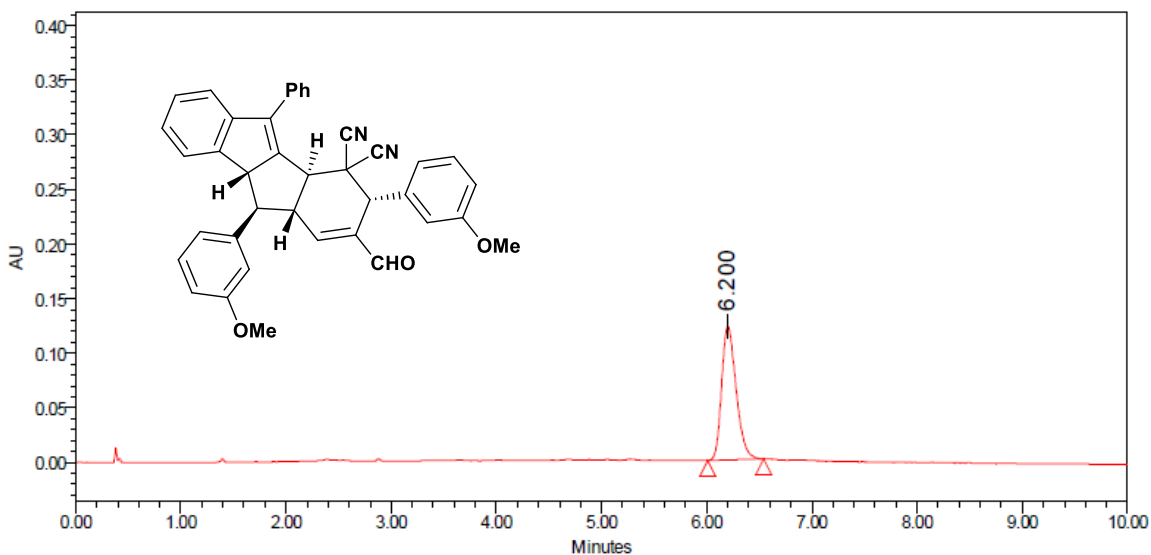

**Peak Results**

|   | RT    | % Area |
|---|-------|--------|
| 1 | 6.200 | 100.00 |

**(3*S*,4*aS*,9*bR*,10*R*,10*aR*)-2-formyl-5-phenyl-3,10-di-*p*-tolyl-4*a*,9*b*,10,10*a*-tetrahydroindeno  
[2,1-*a*]indene-4,4(3*H*)-dicyanitrile 3d**

**Racemic sample**

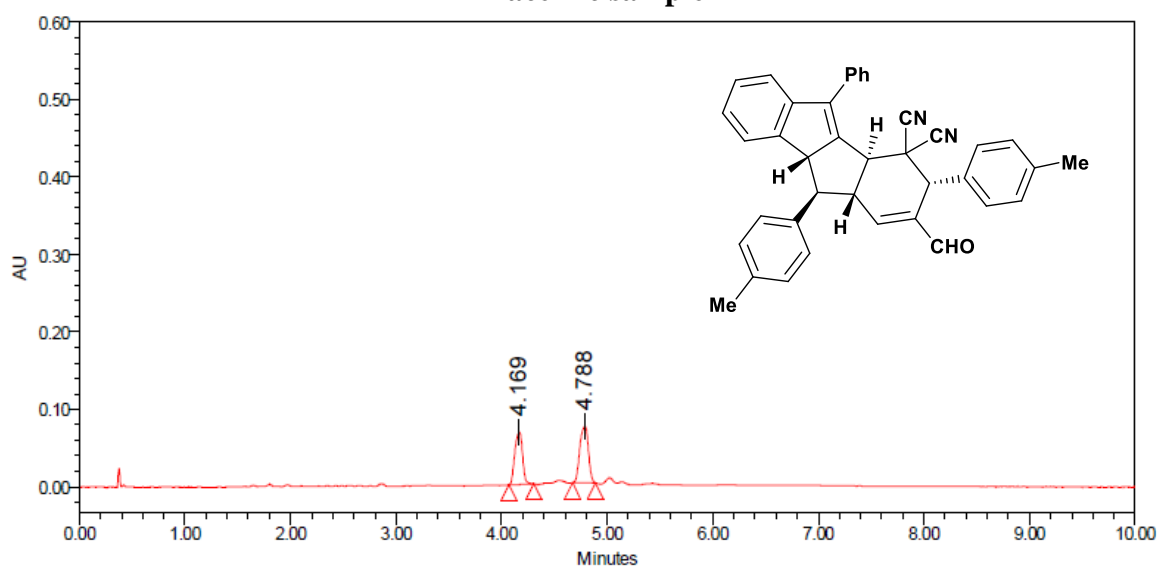

**Peak Results**

|   | RT    | % Area |
|---|-------|--------|
| 1 | 4.169 | 45.44  |
| 2 | 4.788 | 54.56  |

**Enantiomerically enriched sample**

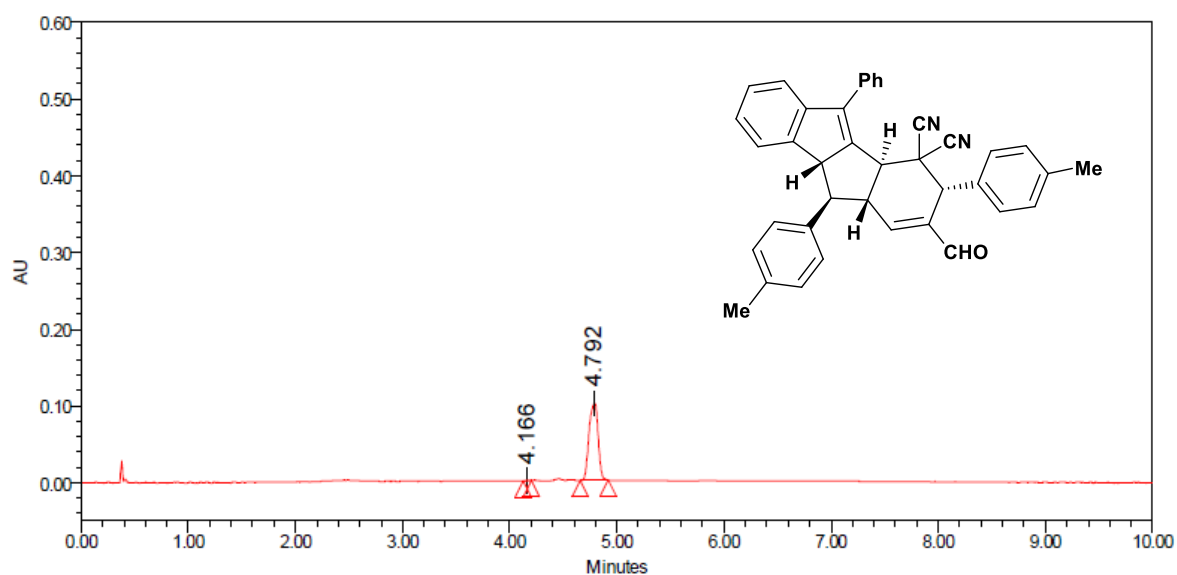

**Peak Results**

|   | RT    | % Area |
|---|-------|--------|
| 1 | 4.166 | 0.04   |
| 2 | 4.792 | 99.96  |

**(3*S*,4*aS*,9*bR*,10*R*,10*aR*)-3,10-bis(4-chlorophenyl)-2-formyl-5-phenyl-4*a*,9*b*,10,10*a*-tetrahydroindeno[2,1-*a*]indene-4,4(3*H*)-dicyanitrile 3e**  
**Racemic sample**

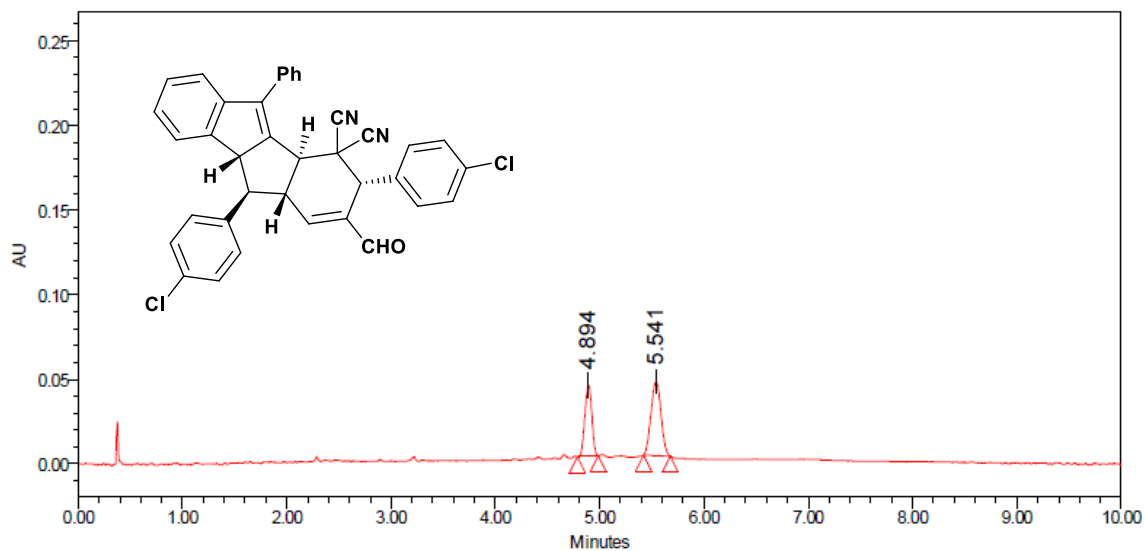

**Peak Results**

|   | RT    | % Area |
|---|-------|--------|
| 1 | 4.894 | 39.97  |
| 2 | 5.541 | 60.03  |

**Enantiomerically enriched sample**

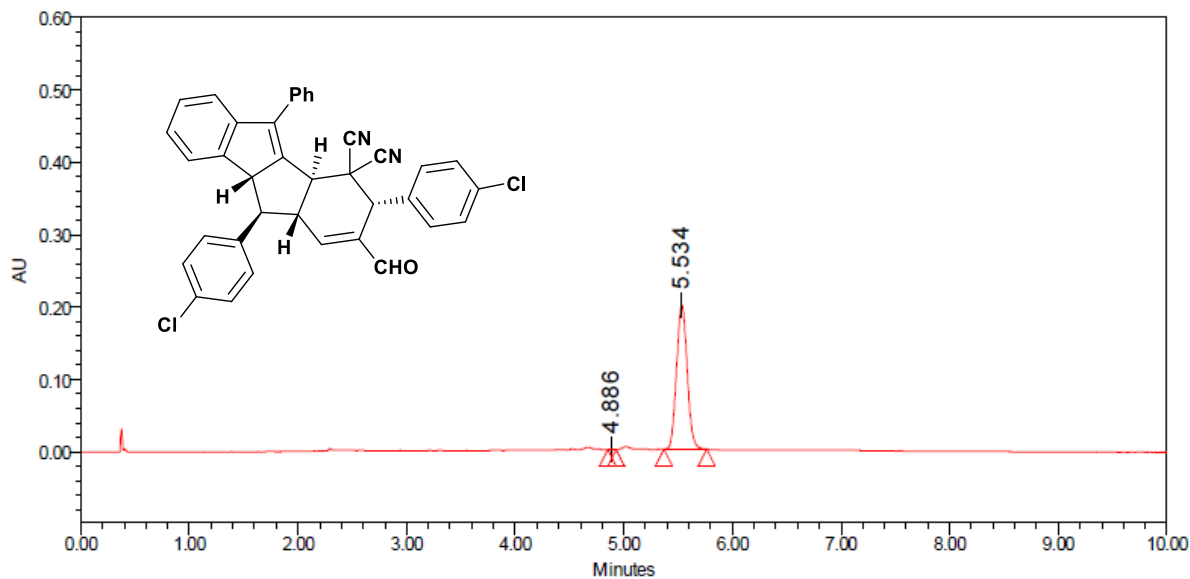

**Peak Results**

|   | RT    | % Area |
|---|-------|--------|
| 1 | 4.886 | 0.06   |
| 2 | 5.534 | 99.94  |

**(3*S*,4*aS*,9*bR*,10*R*,10*aR*)-2-formyl-5-phenyl-3,10-bis(4-(trifluoromethyl)phenyl)-4*a*,9*b*,10,10*a*-tetrahydroindeno[2,1-*a*]indene-4,4(3*H*)-dicarbonitrile 3f**

**Racemic sample**

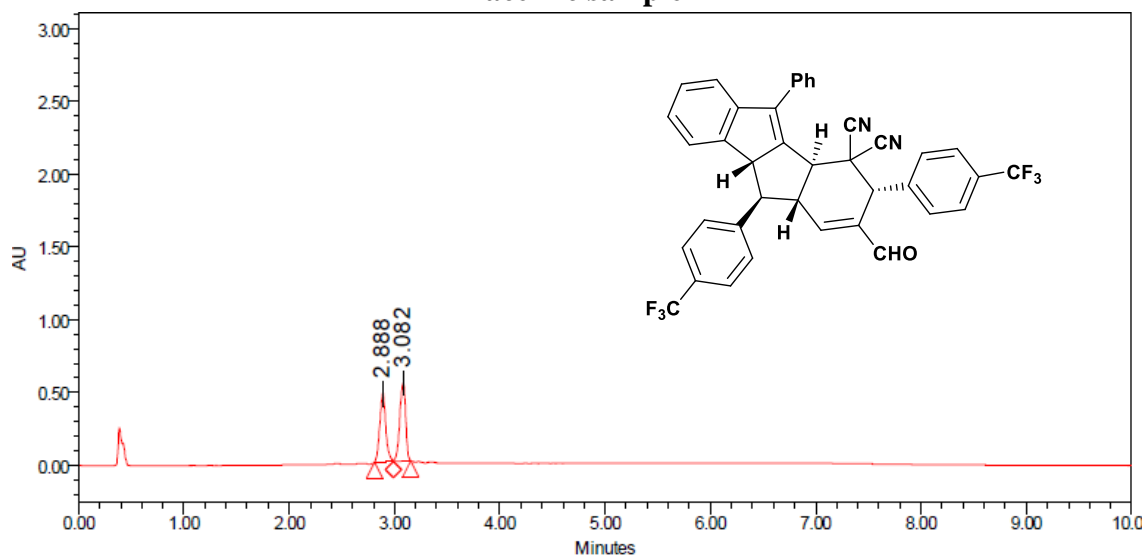

**Peak Results**

|   | RT    | % Area |
|---|-------|--------|
| 1 | 2.888 | 47.44  |
| 2 | 3.082 | 52.56  |

**Enantiomerically enriched sample**

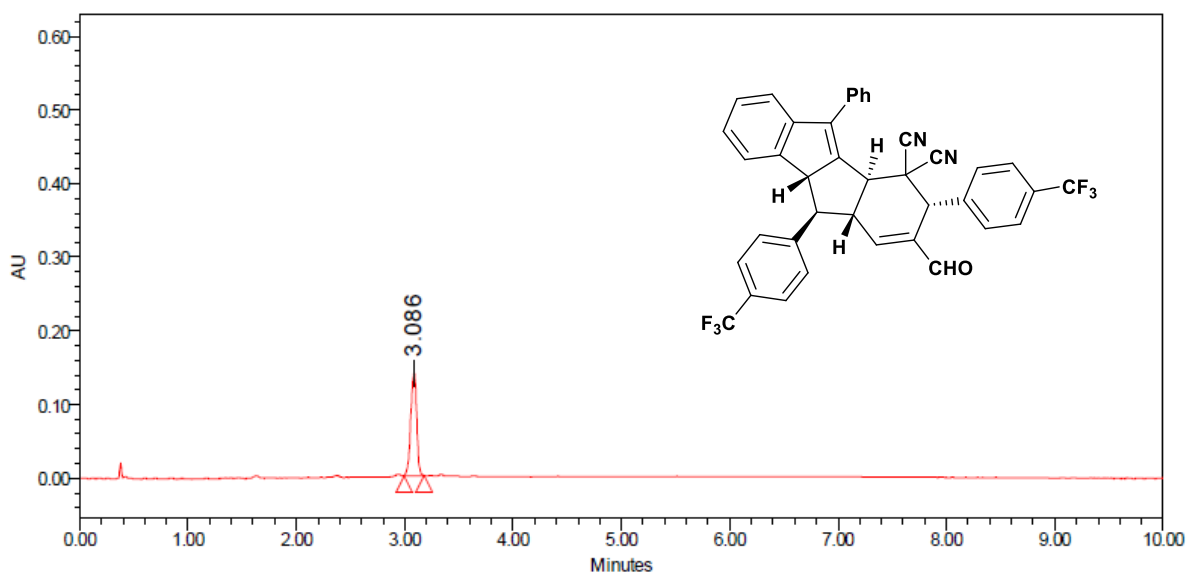

**Peak Results**

|   | RT    | % Area |
|---|-------|--------|
| 1 | 3.086 | 100.00 |

(3*S*,4*aS*,9*bR*,10*R*,10*aR*)-2-formyl-3,10-di(naphthalen-2-yl)-5-phenyl-4*a*,9*b*,10,10*a*-tetrahydroindeno[2,1-*a*]indene-4,4(3*H*)-dicyanonitrile **3g**

Racemic sample

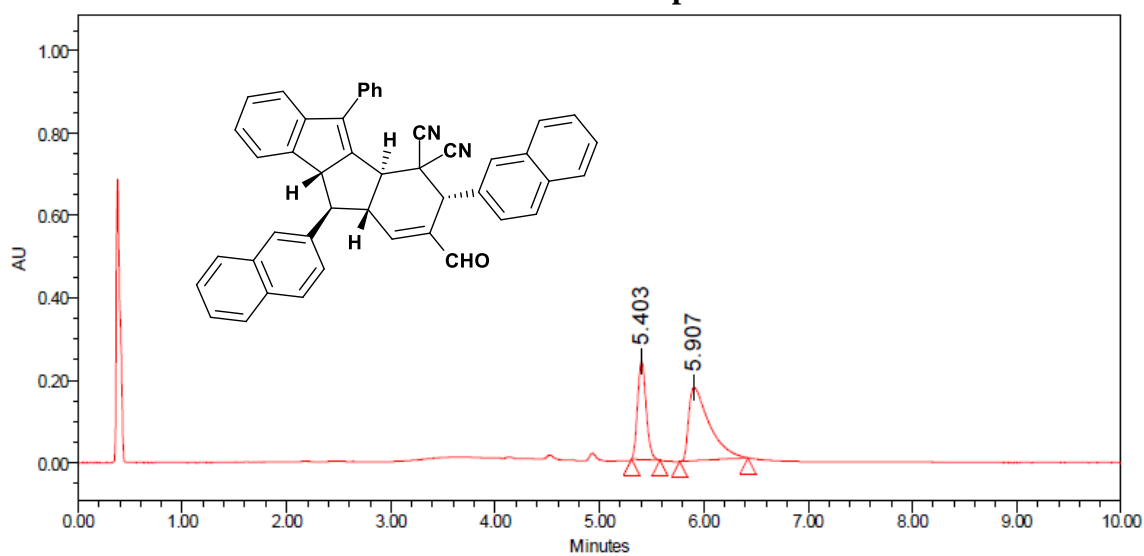

Peak Results

|   | RT    | % Area |
|---|-------|--------|
| 1 | 5.403 | 35.83  |
| 2 | 5.907 | 64.17  |

Enantiomerically enriched sample

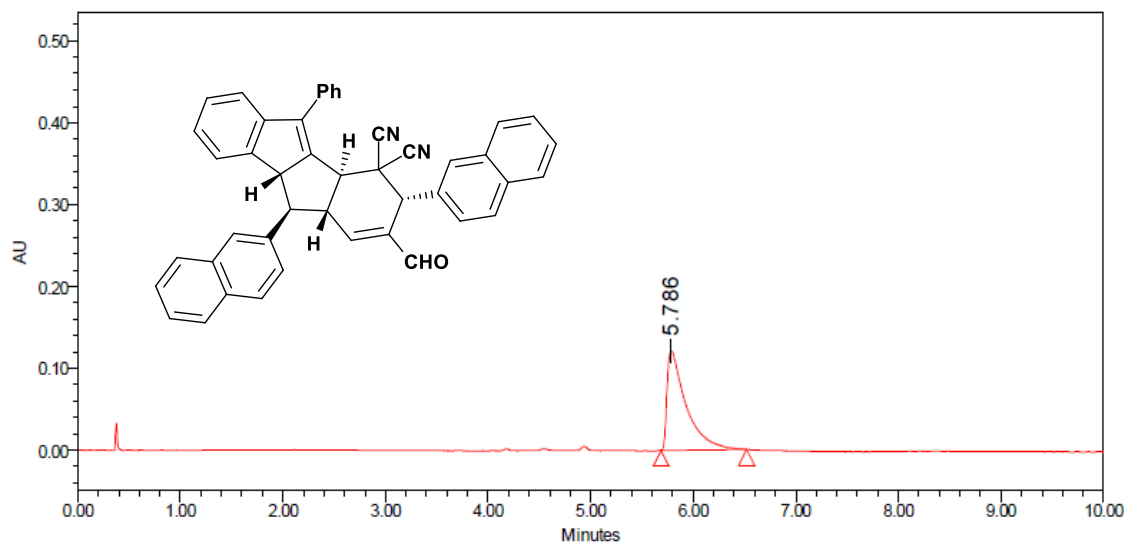

Peak Results

|   | RT    | % Area |
|---|-------|--------|
| 1 | 5.786 | 100.00 |

**(3S,4aS,9bR,10R,10aS)-2-formyl-3,10-di(furan-2-yl)-5-phenyl-4a,9b,10,10a-tetrahydroindeno[2,1-a]indene-4,4(3H)-dicarbonitrile 3h**

**Racemic sample**

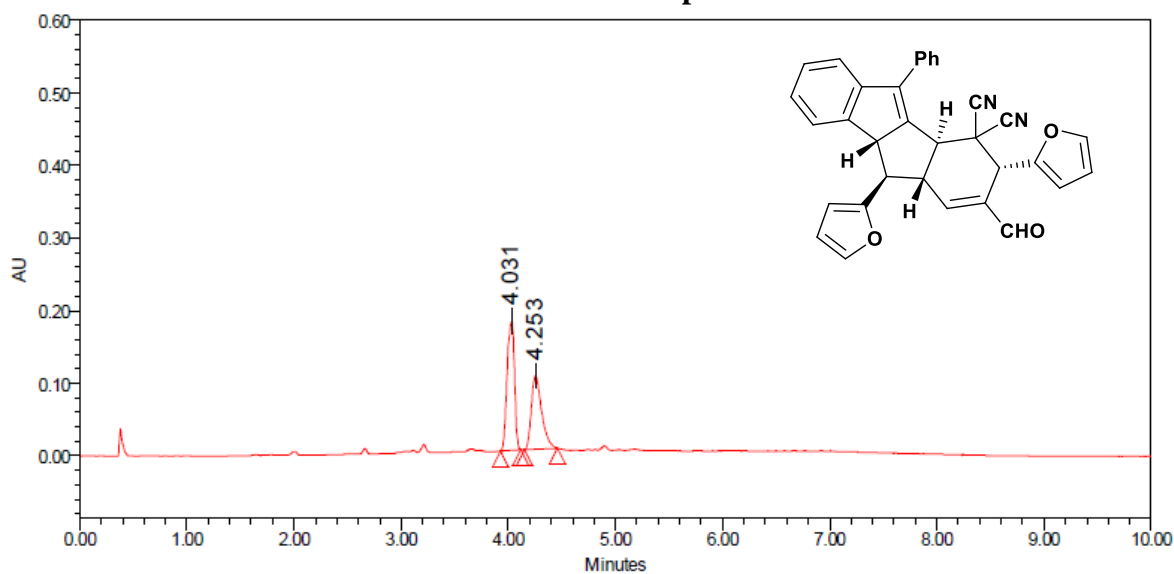

**Peak Results**

|   | RT    | % Area |
|---|-------|--------|
| 1 | 4.031 | 55.59  |
| 2 | 4.253 | 44.41  |

**Enantiomerically enriched sample**

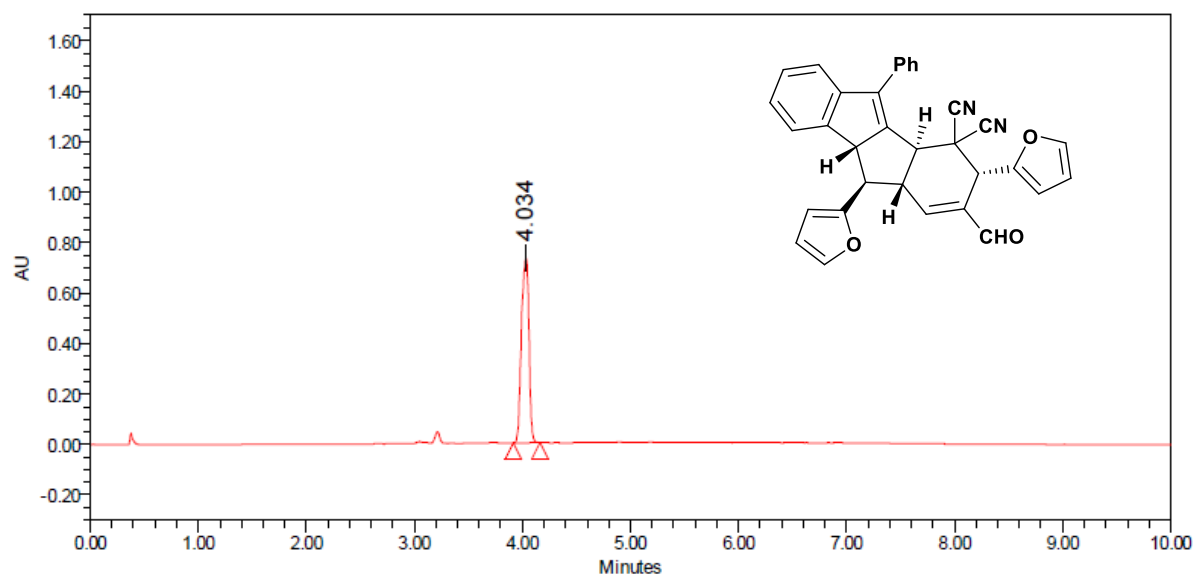

**Peak Results**

|   | RT    | % Area |
|---|-------|--------|
| 1 | 4.034 | 100.00 |



**(3*S*,4*aS*,9*bR*,10*R*,10*aR*)-2-formyl-7-methoxy-3,5,10-triphenyl-4*a*,9*b*,10,10*a*-  
tetrahydroindeno[2,1-*a*]indene-4,4(3*H*)-dicyanitrile 3i**

**Racemic sample**

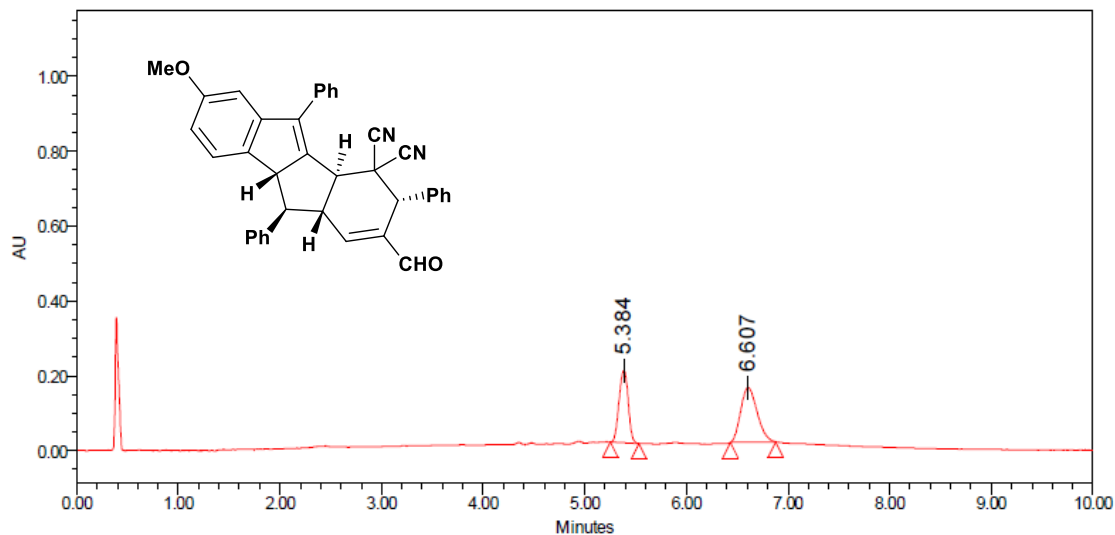

**Peak Results**

|   | RT    | % Area |
|---|-------|--------|
| 1 | 5.384 | 42.53  |
| 2 | 6.607 | 57.47  |

**Enantiomerically enriched sample**

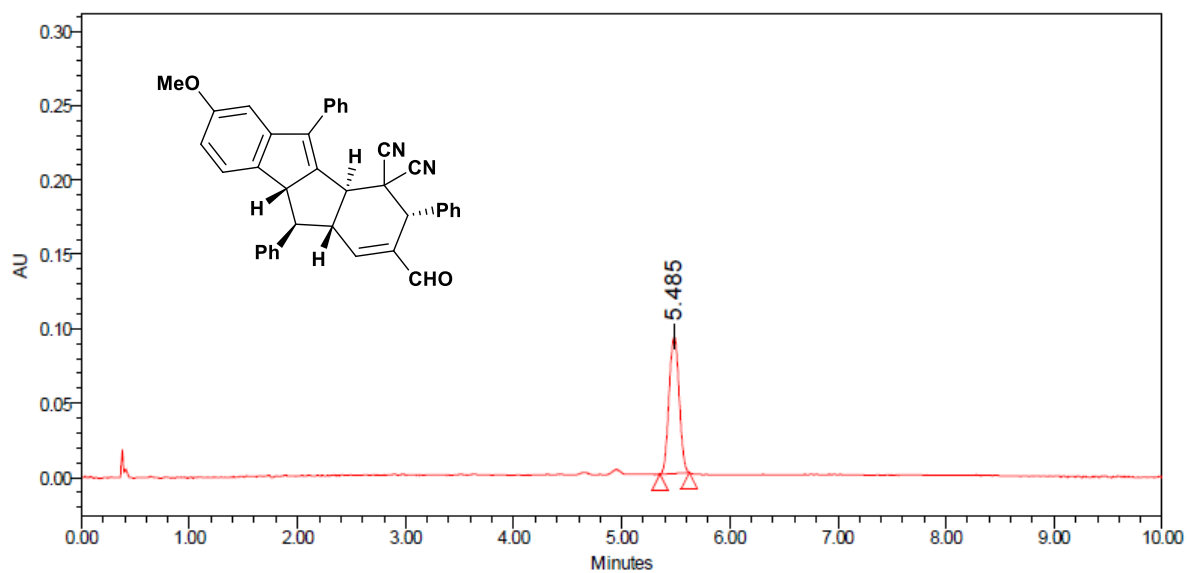

**Peak Results**

|   | RT    | % Area |
|---|-------|--------|
| 1 | 5.485 | 100.00 |

**(3S,4aS,9bR,10R,10aR)-2-formyl-8-methoxy-3,5,10-triphenyl-4a,9b,10,10a-tetrahydroindeno[2,1-a]indene-4,4(3H)-dicyanitrile 3j**

**Racemic sample**

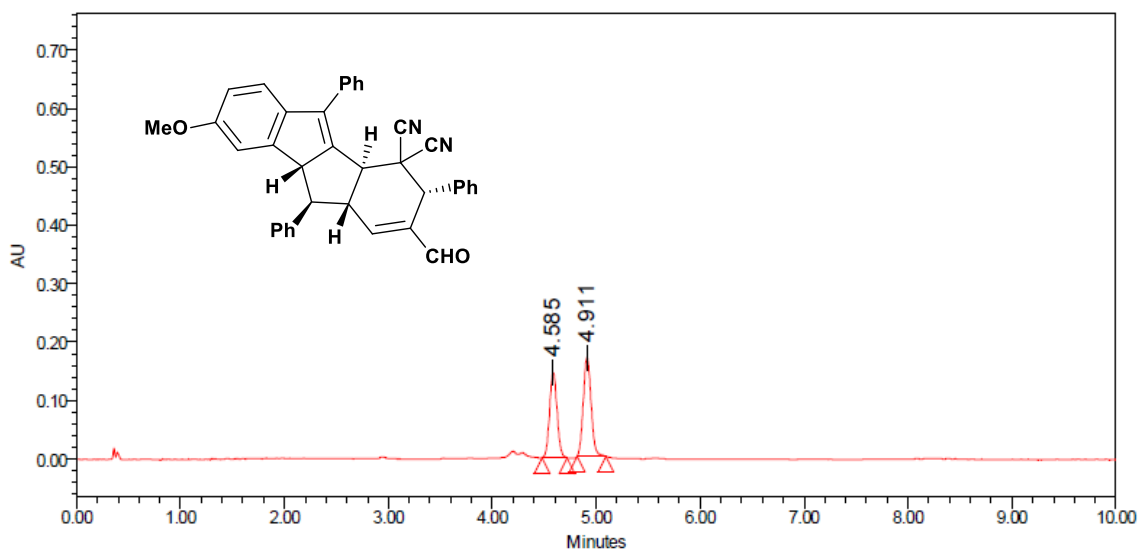

**Peak Results**

|   | RT    | % Area |
|---|-------|--------|
| 1 | 4.585 | 45.08  |
| 2 | 4.911 | 54.92  |

**Enantiomerically enriched sample**

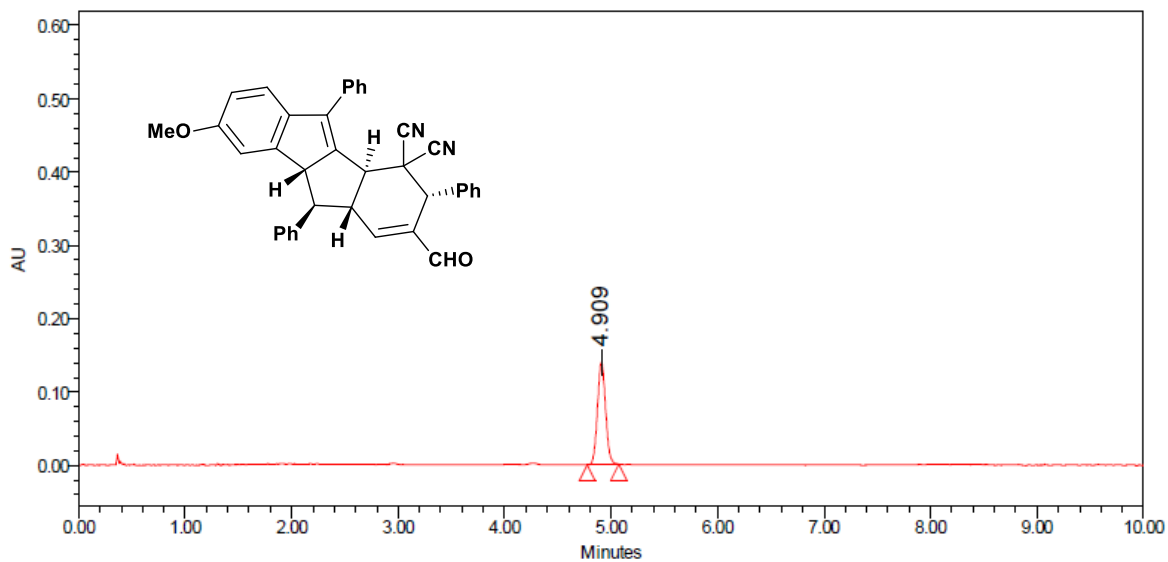

**Peak Results**

|   | RT    | % Area |
|---|-------|--------|
| 1 | 4.909 | 100.00 |

**(3*S*,4*aS*,9*bR*,10*R*,10*aR*)-2-formyl-7-methyl-3,5,10-triphenyl-4*a*,9*b*,10,10*a*-tetrahydroindeno[2,1-*a*]indene-4,4(3*H*)-dicarbonitrile 3k**

**Racemic sample**

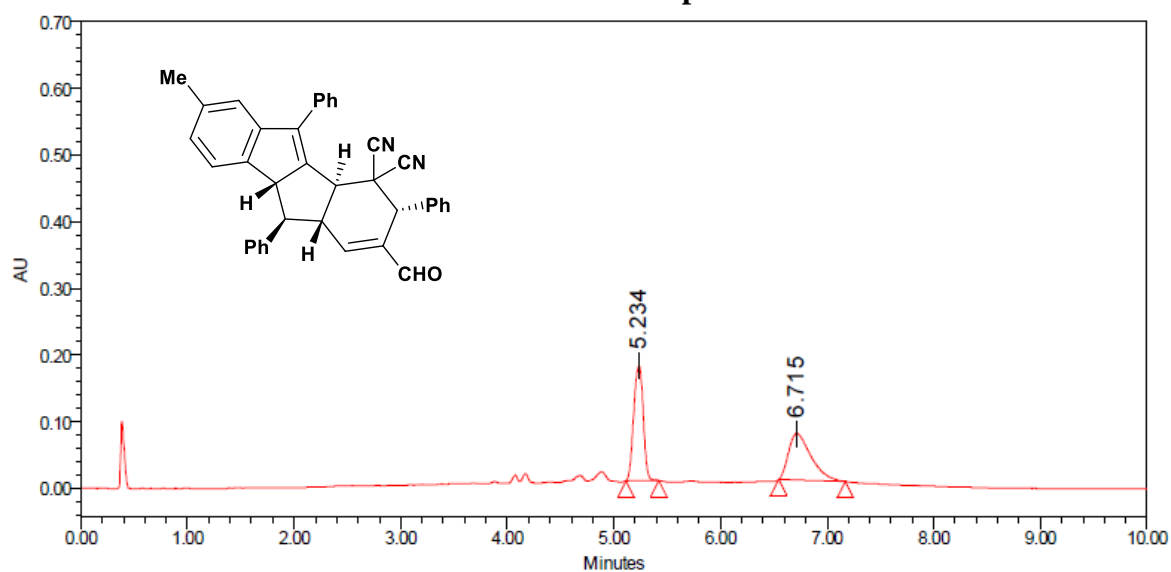

**Peak Results**

|   | RT    | % Area |
|---|-------|--------|
| 1 | 5.234 | 51.16  |
| 2 | 6.715 | 48.84  |

**Enantiomerically enriched sample**

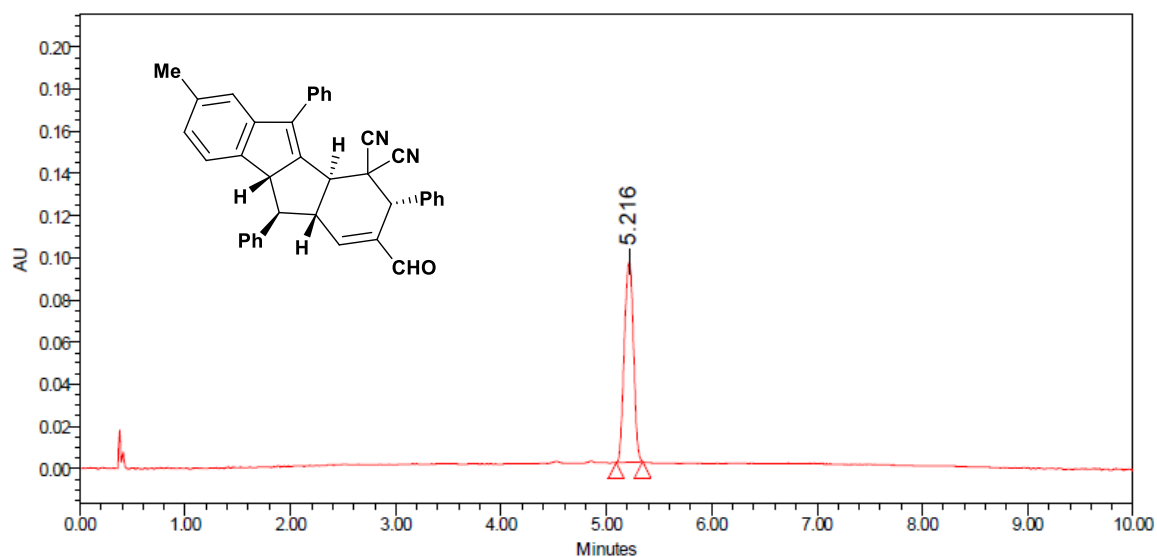

**Peak Results**

|   | RT    | % Area |
|---|-------|--------|
| 1 | 5.216 | 100.00 |

(3*S*,4*aS*,9*bR*,10*R*,10*aR*)-8-bromo-2-formyl-3,5,10-triphenyl-4*a*,9*b*,10,10*a*-  
tetrahydroindeno[2,1-*a*]indene-4,4(3*H*)-dicyanitrile **3l**

Racemic sample

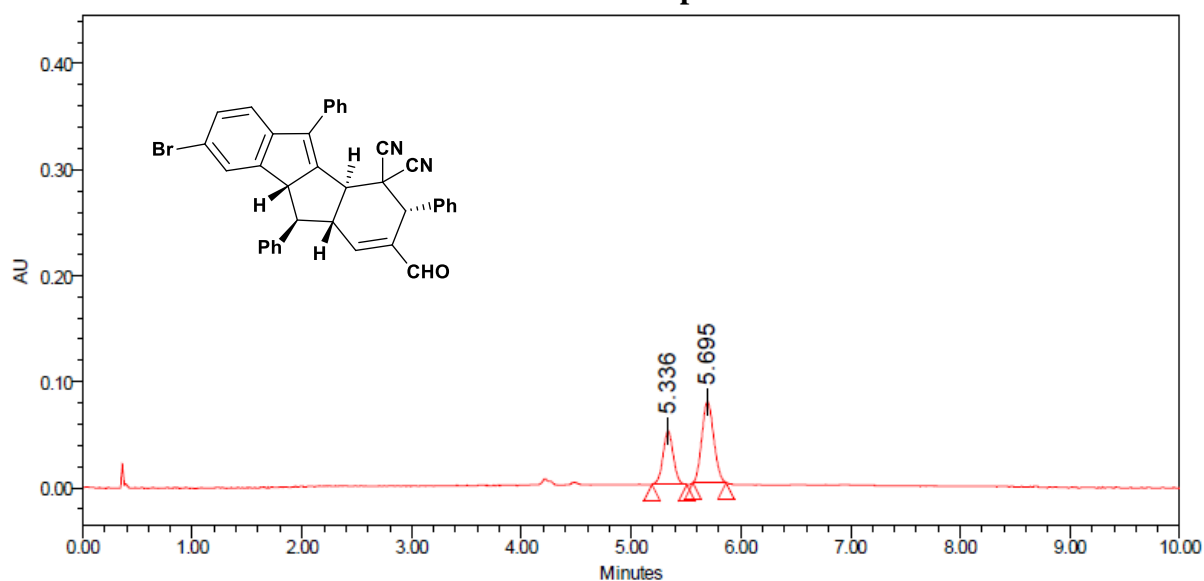

Peak Results

|   | RT    | % Area |
|---|-------|--------|
| 1 | 5.336 | 36.06  |
| 2 | 5.695 | 63.94  |

Enantiomerically enriched sample

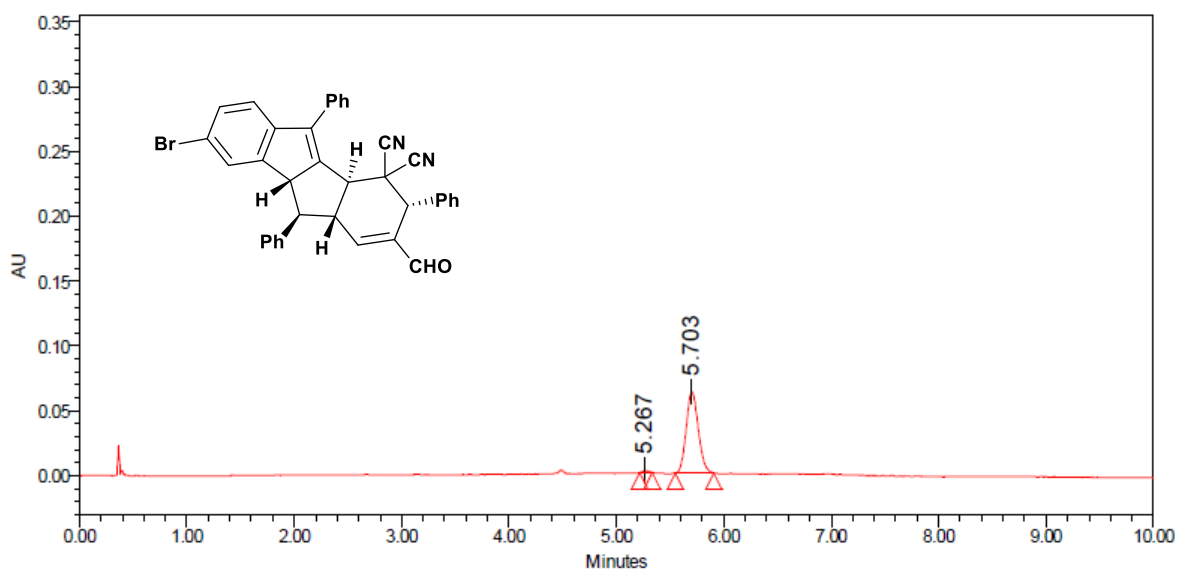

Peak Results

|   | RT    | % Area |
|---|-------|--------|
| 1 | 5.267 | 1.17   |
| 2 | 5.703 | 98.83  |

**(3*S*,4*aS*,9*bS*,10*R*,10*aR*)-9-bromo-2-formyl-3,5,10-triphenyl-4*a*,9*b*,10,10*a*-  
tetrahydroindeno[2,1-*a*]indene-4,4(3*H*)-dicyanitrile 3*m***

**Racemic sample**

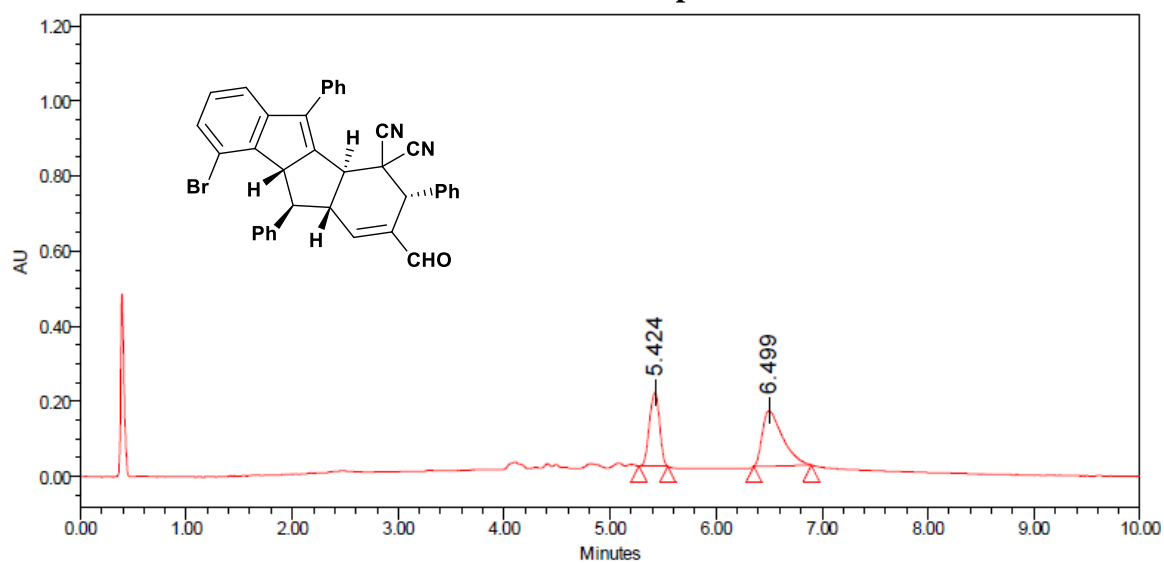

**Peak Results**

|   | RT    | % Area |
|---|-------|--------|
| 1 | 5.424 | 39.82  |
| 2 | 6.499 | 60.18  |

**Enantiomerically enriched sample**

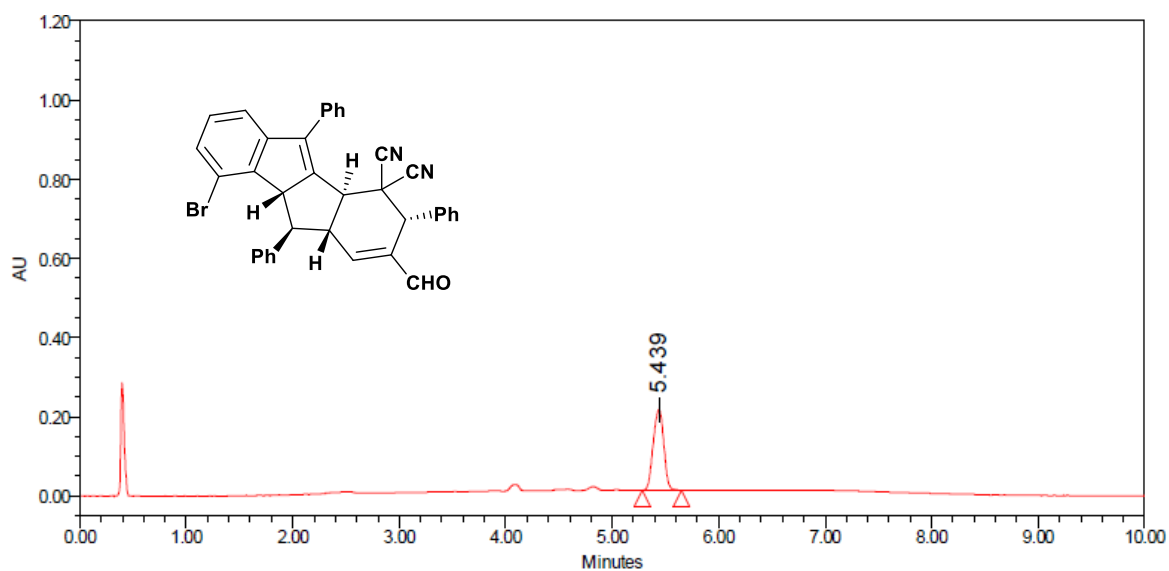

**Peak Results**

|   | RT    | % Area |
|---|-------|--------|
| 1 | 5.439 | 100.00 |

**(3S,4aS,9bR,10R,10aR)-2-formyl-5-(4-methoxyphenyl)-3,10-diphenyl-4a,9b,10,10a-tetrahydroindeno[2,1-a]indene-4,4(3H)-dicarbonitrile 3n**

**Racemic sample**

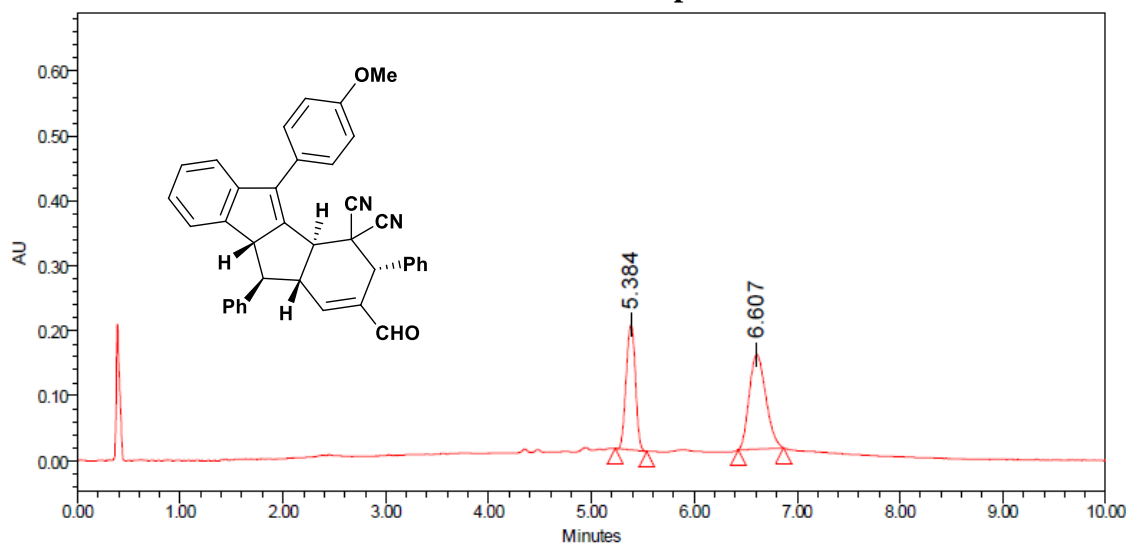

**Peak Results**

|   | RT    | % Area |
|---|-------|--------|
| 1 | 5.384 | 42.42  |
| 2 | 6.607 | 57.58  |

**Enantiomerically enriched sample**

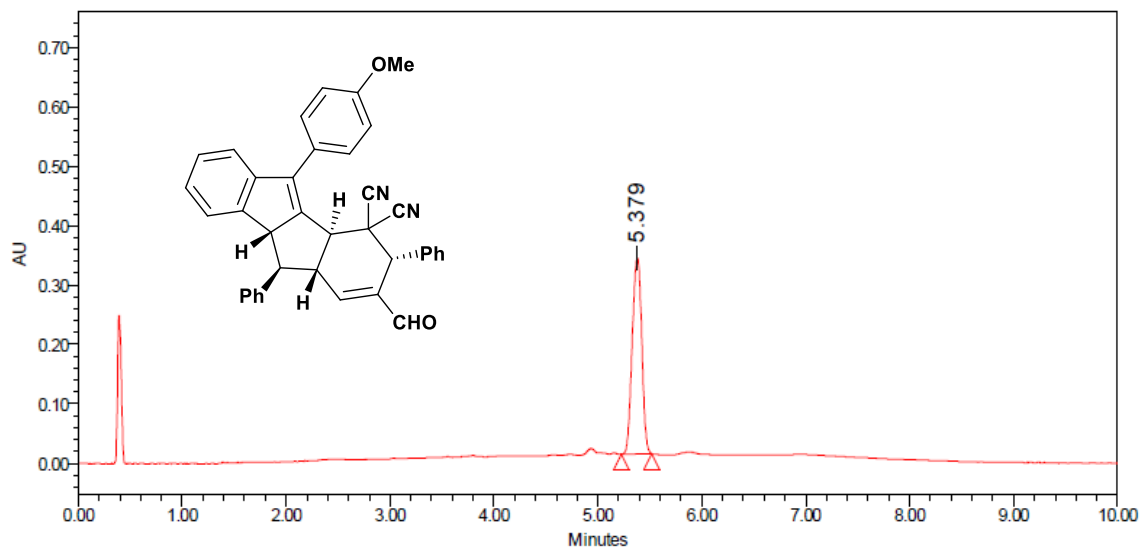

**Peak Results**

|   | RT    | % Area |
|---|-------|--------|
| 1 | 5.379 | 100.00 |

**(3S,4aS,9bR,10R,10aR)-5-(4-fluorophenyl)-2-formyl-3,10-diphenyl-4a,9b,10,10a-tetrahydroindeno[2,1-a]indene-4,4(3H)-dicarbonitrile 3o**

**Racemic sample**

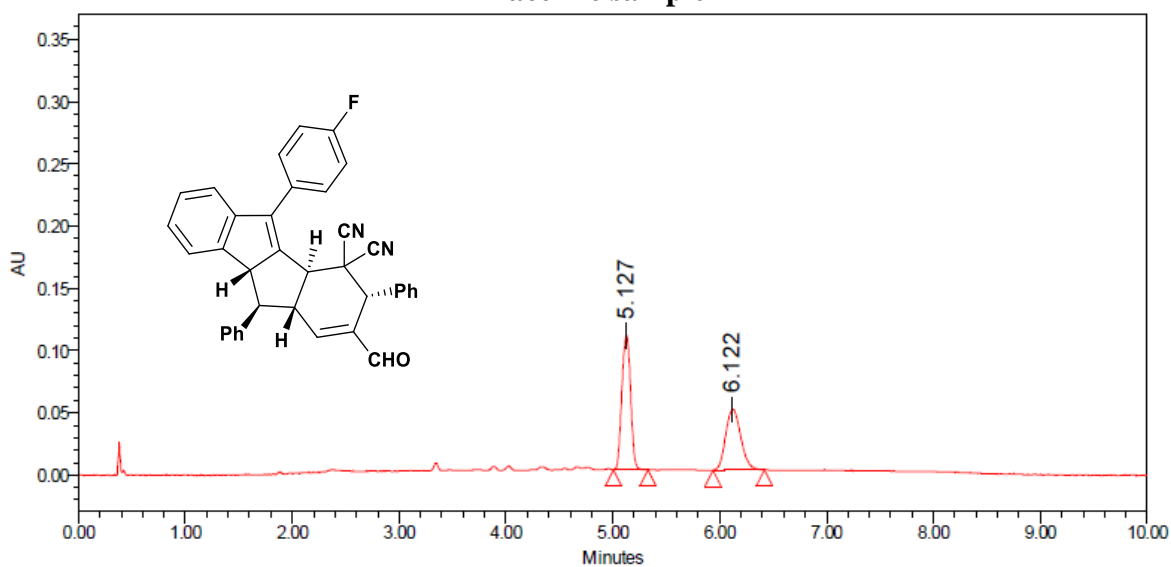

**Peak Results**

|   | RT    | % Area |
|---|-------|--------|
| 1 | 5.127 | 55.99  |
| 2 | 6.122 | 44.01  |

**Enantiomerically enriched sample**

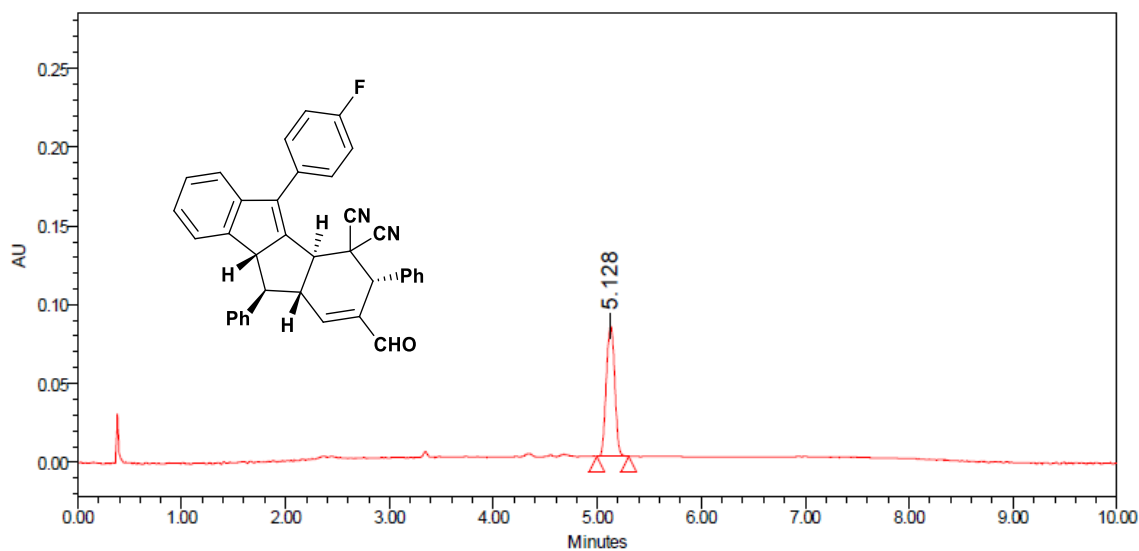

**Peak Results**

|   | RT    | % Area |
|---|-------|--------|
| 1 | 5.128 | 100.00 |

**(3*S*,4*aS*,9*bR*,10*R*,10*aR*)-5-([1,1'-biphenyl]-4-yl)-2-formyl-3,10-diphenyl-4*a*,9*b*,10,10*a*-tetrahydroindeno[2,1-*a*]indene-4,4(3*H*)-dicarbonitrile 3p**

**Racemic sample**

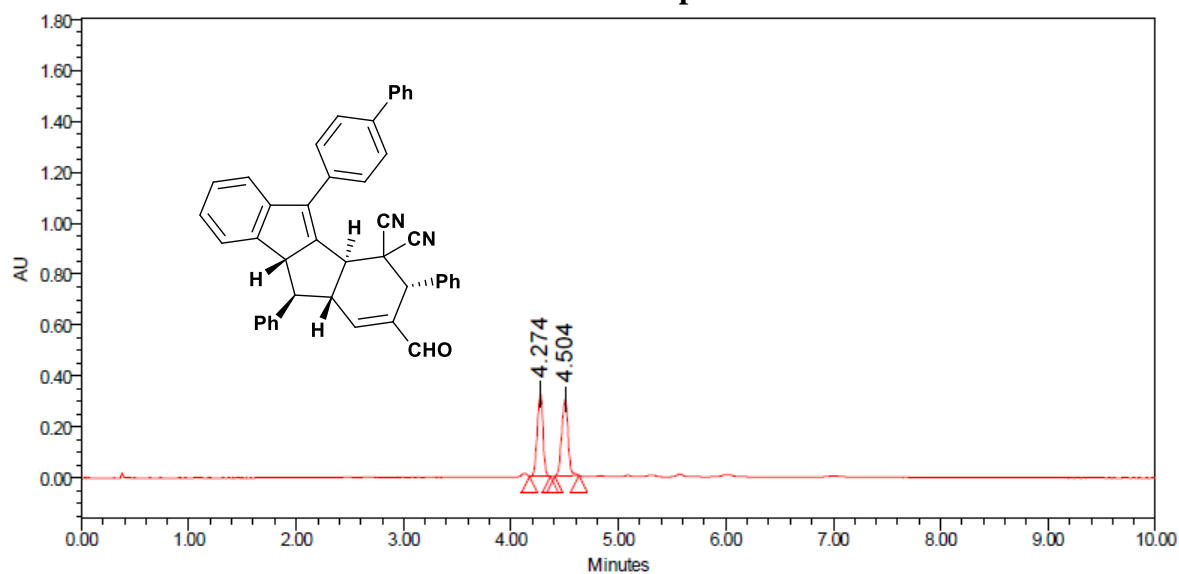

**Peak Results**

|   | RT    | % Area |
|---|-------|--------|
| 1 | 4.274 | 49.36  |
| 2 | 4.504 | 50.64  |

**Enantiomerically enriched sample**

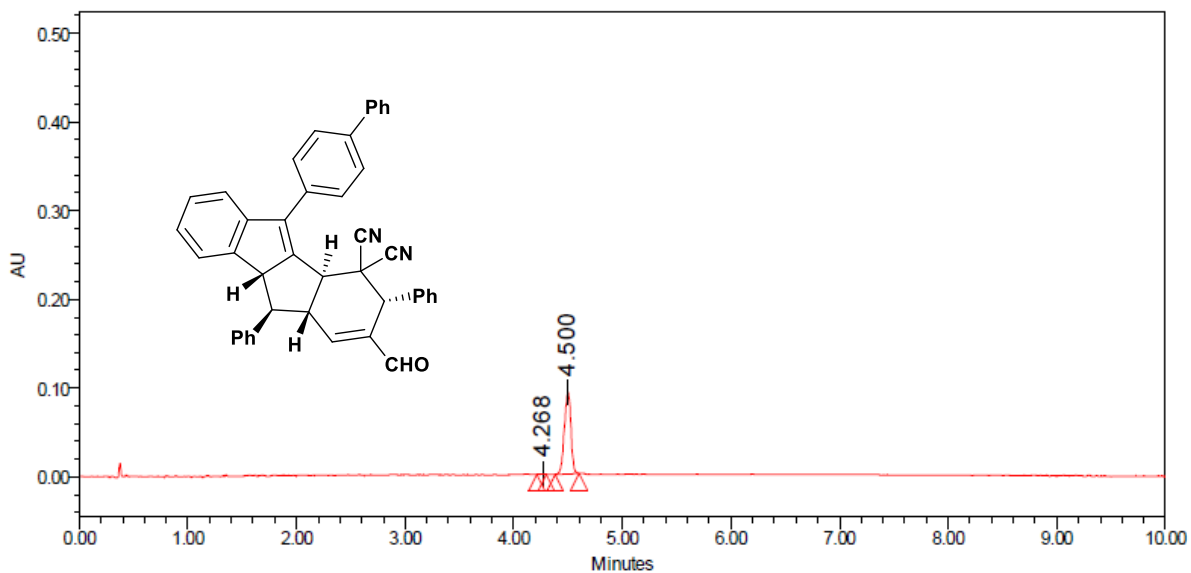

**Peak Results**

|   | RT    | % Area |
|---|-------|--------|
| 1 | 4.268 | 0.36   |
| 2 | 4.500 | 99.64  |



**(3*S*,4*aS*,9*bR*,10*R*,10*aR*)-2-formyl-5-(5-methylthiophen-2-yl)-3,10-diphenyl-4*a*,9*b*,10,10*a*-tetrahydroindeno[2,1-*a*]indene-4,4(3*H*)-dicarbonitrile 3q**

**Racemic sample**

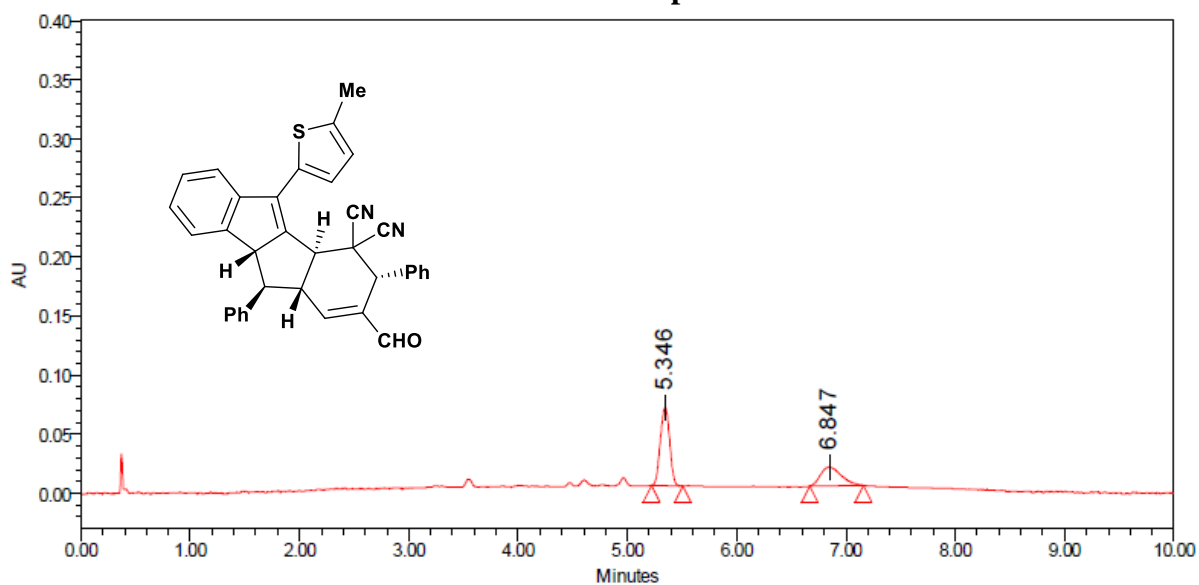

**Peak Results**

|   | RT    | % Area |
|---|-------|--------|
| 1 | 5.346 | 65.32  |
| 2 | 6.847 | 34.68  |

**Enantiomerically enriched sample**

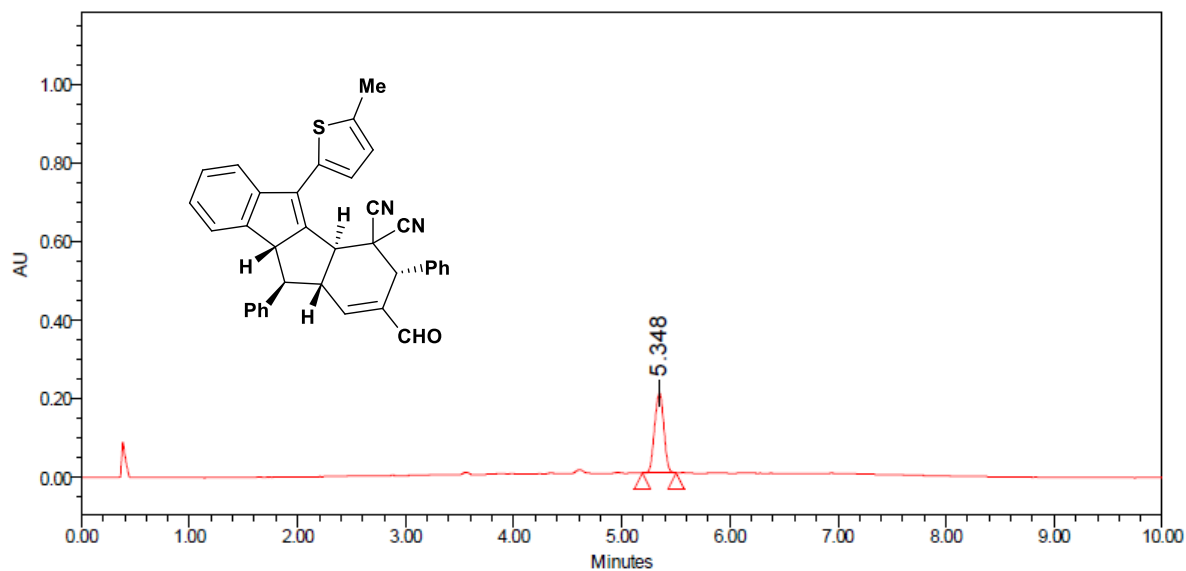

**Peak Results**

|   | RT    | % Area |
|---|-------|--------|
| 1 | 5.348 | 100.00 |

**(3S,4aS,9bS,10R,10aR)-2-formyl-3,10-diphenyl-4a,9b,10,10a-tetrahydroindeno[2,1-a]indene-4,4(3H)-dicarbonitrile 3r**

**Racemic sample**

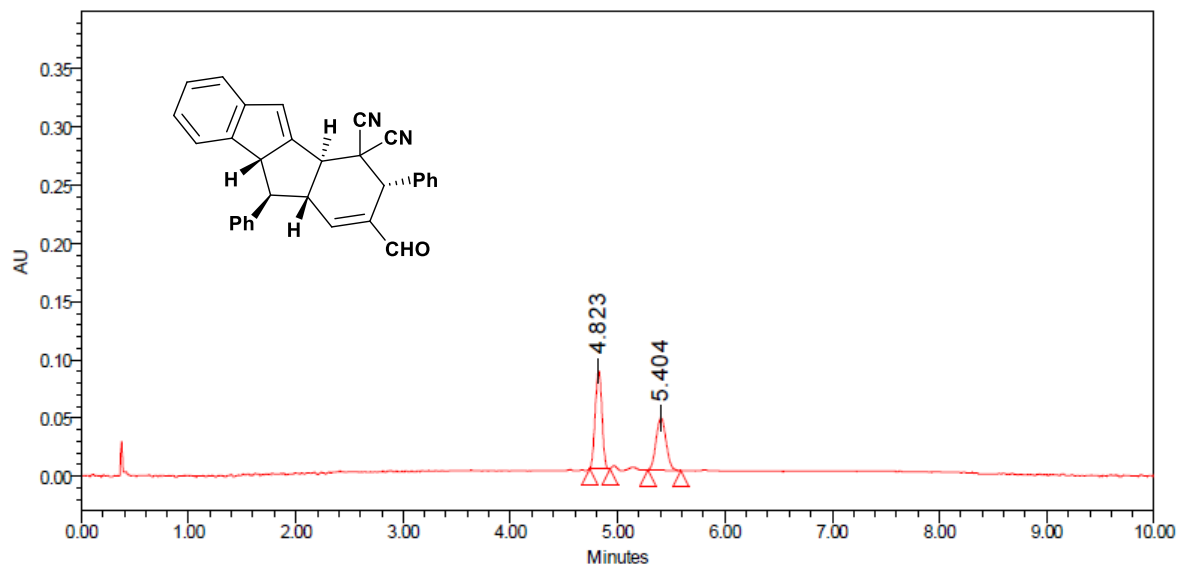

**Peak Results**

|   | RT    | % Area |
|---|-------|--------|
| 1 | 4.823 | 55.88  |
| 2 | 5.404 | 44.12  |

**Enantiomerically enriched sample**

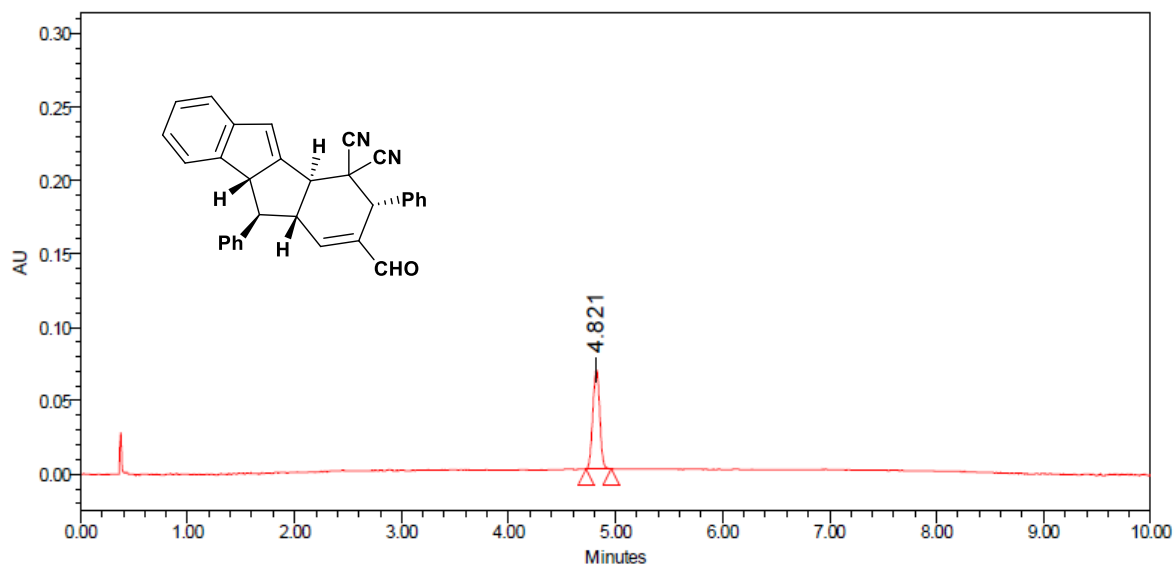

**Peak Results**

|   | RT    | % Area |
|---|-------|--------|
| 1 | 4.821 | 100.00 |
